# Supplementary material for: Proteomic profiling of serum exosomes reveals acute phase response and promotion of inflammatory and platelet activation pathways in patients with heat stroke
Source: PeerJ journal article supplement (doi:10.7717/peerj.16590), 2023-12-13
Supplement: Figure1CData.zip [file .xlsx]

## Sheet: Sheet1
CD9	CD63	Tsg-101	CD9	CD63	Tsg-101	CD9	CD63	Tsg-101
1.54	1.45	1.23	0.91	1.02	0.76	1.04	1.44	0.76
1.03	0.87	1.31	0.87	1.93	1.24	0.74	1.82	0.96
0.93	0.91	0.56	1.12	0.89	1.09	1.43	0.75	1.33
