# Supplementary material for: Proteomic profiling of serum exosomes reveals acute phase response and promotion of inflammatory and platelet activation pathways in patients with heat stroke
Source: PeerJ. 2023 Dec 13;11:e16590. doi: 10.7717/peerj.16590 (PMC10725172; doi:10.7717/peerj.16590)
Supplement: Supplemental Information 3 [file peerj-11-16590-s003.xlsx]

## Sheet: Sheet1
Ctrl	mild-HS	severe-HS
3.2	5.5	6.7
2.9	4.6	8.8
4.1	6.3	7.8
2.8	5.7	10.9
3.5		7.1
3.4		9
