# Supplementary material for: Proteomic profiling of serum exosomes reveals acute phase response and promotion of inflammatory and platelet activation pathways in patients with heat stroke
Source: PeerJ. 2023 Dec 13;11:e16590. doi: 10.7717/peerj.16590 (PMC10725172; doi:10.7717/peerj.16590)
Supplement: Supplemental Information 5 [file peerj-11-16590-s005.xlsx]

## Sheet: Sheet1
vWF-0	vWF-1	vWF-2	SAA-0	SAA-1	SAA-2	S100A8-0	S100A8-1	S100A8-2
43	478	246	30	523	915	80	415	1500
78	453	483	43	612	1167	12	667	2150
53	498	930	80	345	1435	10	935	4000
98	509	863	43	412	2334	12	324	2150
10	528	713	80	793	1149	14	649	4000
28	410	943	80	456	1300	21	800	4000
10	408	912	67	647	2078	11	587	3350
8	493	721	80	802	624	29	124	4000
39	390	697	80	821	1200	20	700	4000
10	429	973	23	502	1476	33	976	1150
29	447	1172	82	512	975	70	475	4100
47	430	1232	33	623	1735	33	235	1650
30	420	512	78	683	1015	70	515	3900
20	581	741	10	722	1244	70	744	500
81	534	812	8	740	1315	57	815	400
34	464	664	10	345	1433	70	933	500
64	500	932	12	265	2366	70	668	600
30	498	831	19	871	1726	13	1226	950
98	200	646	9	827	2446	72	946	450
50	463	797	27	757	3415	23	915	1350
63	500	1575	10	793	1224	68	724	500
100	463		0	401		17	512
63	643		61	423		35	741
100	318		14	412		18	812
100	487		44	409		8	930
87	164		10	756		69	863
100	500		78	793		22	300
100	443		14	793		52	300
43	354		66	780		18	300
102			34			22
