# Supplementary material for: Proteomic profiling of serum exosomes reveals acute phase response and promotion of inflammatory and platelet activation pathways in patients with heat stroke
Source: PeerJ. 2023 Dec 13;11:e16590. doi: 10.7717/peerj.16590 (PMC10725172; doi:10.7717/peerj.16590)
Supplement: Supplemental Information 6 [file peerj-11-16590-s006.xlsx]

## Sheet: Sheet1
478	246	523	915	415	1500
453	943	612	1300	667	4000
498	721	345	624	935	4000
509	697	412	1200	324	4000
528	973	793	1476	649	1150
410	741	456	1244	800	500
408	664	647	1433	587	500
493	797	802	3415	124	1350
390		821		700
429		502		976
447		512		475
430		623		235
420		683		515
581		722		744
534		740		815
464		345		933
500		265		668
498		871		1226
200		827		946
463		757		915
500		793		724
463		401		512
643		423		741
318		412		812
487		409		930
164		756		863
500		793		300
443		793		300
354		780		300
483		1167		2150
930		1435		4000
863		2334		2150
713		1149		4000
912		2078		3350
1172		975		4100
1232		1735		1650
512		1015		3900
812		1315		400
932		2366		600
831		1726		950
646		2446		450
1575		1224		500
