# Supplementary material for: Proteomic profiling of serum exosomes reveals acute phase response and promotion of inflammatory and platelet activation pathways in patients with heat stroke
Source: PeerJ. 2023 Dec 13;11:e16590. doi: 10.7717/peerj.16590 (PMC10725172; doi:10.7717/peerj.16590)
Supplement: Supplemental Information 7 [file peerj-11-16590-s007.xlsx]

## Sheet: Sheet1
WBC-0	WBC-1	WBC-2	PLT-0	PLT-1	PLT-2	AST-0	AST-1	AST-2	ALT-0	ALT-1	ALT-2	Tbil-0	Tbil-1	Tbil-2	Cr-0	Cr-1	Cr-2	BUN-0	BUN-1	BUN-2	ALB-0	ALB-1	ALB-2	PT-0	PT-1	PT-2	INR-0	INR-1	INR-2	Fib-0	Fib-1	Fib-2	D-Dimer-0	D-Dimer-1	D-Dimer-2	FDP-0	FDP-1	FDP-2	GCS-0	GCS-1	GCS-2	CK-0	CK-1	CK-2	MYO-0	MYO-1	MYO-2	CKMB-0	CKMB-1
10.64	10.76	6.98	296	152	118	23	50	190	27	31	61	4.1	13.2	20.6	82	85	84	4.5	4.9	6	51.8	33.4	41	12.3	15.7	17.6	0.93	1.16	1.39	2.8	2.2	2.1	0.23	1.48	20	4	3.5	135	15	15	4	71	127	4804	27	159	396.4	1.63	10.18
7.72	17.56	5.35	254	132	176	22	57	220	39	123	153	6.8	9.6	44	61	129	185	3.5	10.8	4.2	38.9	40.4	36	12	14.9	12.9	0.9	1.57	2.01	3.2	3.1	1.7	3.9	0.7	20	12.5	110.4	135	15	15	15	67	237	123	34.8	1928	3000	1.78	4.03
6.85	6.56	9.43	260	27	106	23	42	613	36.6	64	94	18.1	19	26.1	59	135	195	2.3	4.7	4.8	38.1	34.9	43.1	13.7	14.3	13.7	1.06	1.46	1.43	4.4	2.4	2.5	2.99	0.55	20	7.7	4	135	15	13	15	28	66	1510	38.8	2618	2028	1.96	12.27
6.62	19.94	10.65	276	123	143	14	82	7939	13	23	53	16.3	17.8	32.7	73	123	84	4.3	4.2	3	39.7	36.7	38.7	13.6	15.2	18.1	1.06	1.86	1.3	3.9	2.4	2.8	1.27	0.37	20	4.8	4	135	15	9	6	42	134	1227	52	1953	262.3	2.6	3.36
7.35	16.71	11.87	301	133	255	14	52	206	15	47	77	7.2	9.9	77	66	129	138	2.6	4.1	11.8	39.6	40.6	36	13.4	15.8	28.9	1.04	2.21	2.49	2.5	1.5	2.86	0.2	1.32	20	4	4	64.7	15	15	4	90	132	1254	46.2	75.54	212.6	3.78	1.87
10.95	22.27	9.22	134	128	49	16	56	1979	14	186	216	6.9	16.8	40.6	60	149	147	5.3	2.9	6.8	44.8	38.4	36	12.9	12.8	16.8	0.94	2.07	2.45	2.7	2.4	2.6	3.44	0.22	10.27	10.5	4	135	15	15	7	80	154	2752	34	665.6	538.8	4.25	2.85
11.77	7.18	7.47	115	105	198	15	64	228	12	170	200	8	9	74.6	110	143	88	5	4.5	4.3	43.7	41.4	36.7	12.1	17.7	19.6	0.91	1.19	1.33	3.6	1.9	2.5	2.87	2.41	10.11	7.1	4	53.5	15	7	3	26	534	8669	23	279.2	1318	1.35	1.25
17.75	9.46	7.75	116	175	91	13	375	837	13	50	80	13.4	26.6	37.9	87	84	121	4	5.3	8.8	47.1	32.2	38.4	12.1	14.6	26.6	0.9	1.43	1.61	3.8	2	2.2	1.9	0.47	20	6.8	4	13.4	15	15	5	74	219	1264	65.1	40.39	1666	0.26	11.2
9.7	16.15	13.67	155	186	144	32	107	7024	30	113	143	6.6	12.7	14.5	117	132	69	6.2	7.7	2.5	35.8	46.9	38.8	14.1	17.4	16	1.1	1.23	1.52	3.9	2.3	2.3	2.2	0.77	20	10.2	7.1	15.3	15	15	4	24	383	21106	45.2	327.2	1227	2.96	5.09
10.83	9.36	13.41	220	166	115	23	63	85	35	100	130	6.3	15.8	27.6	131	76	201	6.7	5	5.4	40.1	43.5	34	13.7	14.9	27	1.06	1.09	2.86	3.4	2.3	2.2	0.09	5.42	20	9.4	4	48.6	15	15	15	73	329	3414	28.9	49.03	1254	2.96	3.88
6.07	10.28	11.89	213	143	59	45	113	164	46	23	53	9.1	9.7	18.5	130	87	82	8.6	8.9	7.5	49.2	36.9	37.7	13.5	16.1	16.9	1.04	1.18	0.97	4.3	1.8	1.9	0.72	3.46	20	3.4	4	30.1	15	15	15	25	582	317	37.1	23.96	146	2.52	6.29
7.6	4.78	13.6	227	173	138	57	49	120	53	20	50	7	14.8	14.8	118	115	105	5.8	7.1	7.6	35.6	40.7	38.1	14.5	13.3	23	1.13	1.29	1.05	3.6	3	2.1	1.02	3.86	2.21	7.5	4	15.6	15	12	7	64	252	1994	42.1	241.2	2567	5.74	4.45
11.34	3.52	8.43	301	137	55	8	60	112	20	19	49	6.8	35.6	33.9	94	85	119	5.8	3.1	6.3	35.8	38.9	40.6	14.9	15	17.3	1.18	1.01	1.42	4.4	3.2	3	0.45	2.7	20	7.1	7.3	17	15	15	7	53	148	2908	63.9	31.95	3000	1.24	23.7
10.61	4.77	24.33	233	126	33	17	151	14593	18	19	49	16.5	12	103.6	118	70	186	7.7	3.2	11.2	37.6	39.9	31.1	13.5	15.7	38.8	1.02	1.18	1.35	2.5	1.9	1.4	0.23	4.08	14.55	4	4	23.9	15	15	7	26	408	5483	32	20	557.3	4.63	6.22
5.44	4.36	18.02	193	239	76	14	100	446	11	14	44	6.3	12.1	64.7	125	64	153	10.3	3.7	7	34.1	36.5	41.4	14.5	17.7	84	1.09	1.25	2.4	4	2	0.7	0.41	2.88	7.64	3.5	4	135	15	15	8	72	154	8235	52.1	75.49	641	4.78	3.2
10.68	25.93	5.84	223	210	92	33	150	3	37	30	60	14.1	5.8	21.2	77	85	108	5.5	8.1	6.8	52.8	40.1	30.5	13.3	15.3	28.6	1.43	0.96	2.42	3.3	3.3	1	0.33	0.44	20	4.1	10.2	7.7	15	15	7	81	896	19705	37	77.49	1746	4.96	5.24
7.76	9.85	7.78	237	168	24	32	203	64	49	20	50	16.8	9.2	95.6	56	135	222	4.5	5.7	8.7	39.9	39.7	36.6	13	13.9	38.4	1.4	1.47	2.82	3.7	2	0.9	1	0.37	13.35	12.6	4	12.2	15	15	10	77	136	9000	44.8	1806	1970	5.6	5.09
6.89	21.72	9.51	311	171	29	33	104	167	46.6	64	94	28.1	8.7	443.7	54	69	206	3.3	9.6	34.8	39.1	38.5	44.1	14.7	21.4	16.9	1.56	1.14	4.18	4.9	1.7	3.2	1.09	0.53	20	7.8	10	11.8	15	15	7	38	2918	3212	48.8	22.05	935.1	6.78	3.78
6.66	11.44	8.47	243	166	84	24	95	1367	23	56	86	26.3	17.9	12.4	68	153	345	5.3	5.8	6.4	40.7	43	34.7	14.6	24.5	25.8	1.56	1.45	11.09	4.4	1.7	0.7	0.37	0.48	13.01	4.9	5	11.3	15	7	5	52	205	653	62	788.5	3000	7.25	4.25
7.39	11.32	12.56	203	220	39	24	81	6527	25	78	108	17.2	9.4	52.5	61	75	383	3.6	6.6	6.6	40.6	41.5	37.7	14.4	23.3	26.4	1.54	1.2	3.81	3	2.1	2.3	0.3	0.24	4.29	4.1	7	13	15	15	15	100	853	5460	56.2	186.2	1017	4.35	3.35
10.99	15.29	14.43	306	85	75	26	160	63	24	8	38	16.9	14.3	54.1	55	123	231	6.3	5.3	12.3	45.8	39.9	32.1	13.9	14.9	22.3	1.44	1.26	4.46	3.2	3.2	1.2	0.54	0.34	15.6	10.6	4	6.2	15	15	7	90	159	234	44	1084	453	3.26	5.26
11.81	8.99		264	306		25	102		22	18	48	18	10.1		105	101		6	3		44.7	42.8		13.1	14.6		1.41	1.25		4.1	2.6		0.97	6.32		7.2	4.5		15	15		36	3139		33	136		5.96	2.96
17.79	12.31		270	264		23	128		23	18	48	23.4	41.4		82	163		5	7.7		48.1	48.6		13.1	18.8		1.4	1.17		4.3	2.1		1	0.43		6.9	4		15	13		84	4493		75.1	264.9		5.96	2.52
9.74	5.26		286	270		42	198		40	6	36	16.6	16.5		112	73		7.2	8.1		36.8	34.2		15.1	18		1.6	1.11		4.4	2.3		1.3	6.54		10.3	4		15	15		34	1174		55.2	20		5.52	5.74
10.87	10.32		311	286		33	105		45	66	96	16.3	19.4		126	70		7.7	7.6		41.1	42.5		14.7	24.3		1.56	1.7		3.9	2.6		0.19	0.34		9.5	7.1		15	8		83	863		38.9	196.2		8.74	6.35
6.11	16.29		144	311		55	91		56	88	118	19.1	24.3		125	118		9.6	6.3		50.2	40.9		14.5	15.9		1.54	1.76		4.8	3.7		0.82	0.44		3.5	4.6		15	7		35	169		47.1	1094		4.24	8.26
7.64	9.99		125	144		47	170		63	18	48	17	20.1		113	96		6.8	4		36.6	43.8		15.5	15.6		1.63	1.75		4.1	3.1		1.12	6.42		7.6	5.1		15	13		74	3149		52.1	146		2.12	5.96
11.38	4.31		126	125		18	112		30	28	58	16.8	51.4		89	158		6.8	8.7		36.8	49.6		15.9	19.8		1.68	1.67		4.9	2.6		0.55	0.53		7.2	4.1		15	12		63	4503		73.9	274.9		2.54	5.52
10.65	5.26		165	126		27	138		28	28	58	26.5	26.5		113	68		8.7	9.1		38.6	35.2		14.5	19		1.52	1.61		3	2.8		0.33	6.64		4.1	12.3		15	10		36	1184		42	30		1.23	8.74
5.48			304			24			21			16.3			120			11.3			35.1			15.5			1.59			4.5			0.51			3.6			15			82			62.1			1.98
[truncated: 31 more columns]
