# Supplementary material for: Proteomic profiling of serum exosomes reveals acute phase response and promotion of inflammatory and platelet activation pathways in patients with heat stroke
Source: PeerJ. 2023 Dec 13;11:e16590. doi: 10.7717/peerj.16590 (PMC10725172; doi:10.7717/peerj.16590)
Supplement: Supplemental Information 8 [file peerj-11-16590-s008.xlsx]

## Sheet: Sheet1
vWF	SAA-1	S100A8	WBC	PLT	AST	ALT	Tbil	Cr	BUN	ALB	PT	INR	Fib	D-Dimer	FDP	GCS	CK	MYO	CKMB	CTnI	UO	HR	MAP	Lac	PaO2/FiO2	PCT	APACHE II	SOFA	ISTH	MELD
43	30	80	10.64	296	23	27	4.1	82	4.5	51.8	12.3	0.93	2.8	0.23	4	15	71	27	1.63	6.92	3000	85	82	1.2	345	0.33	2	0	0	-0.500189
78	43	12	7.72	254	22	39	6.8	61	3.5	38.9	12	0.9	3.2	3.9	12.5	15	67	34.8	1.78	1.45	2300	71	79	1.3	342	0.21	0	1	0	-1.78624
53	80	10	6.85	260	23	36.6	18.1	59	2.3	38.1	13.7	1.06	4.4	2.99	7.7	15	28	38.8	1.96	5.43	4200	61	92	0.9	308	0.2	2	1	0	3.42796
98	43	12	6.62	276	14	13	16.3	73	4.3	39.7	13.6	1.06	3.9	1.27	4.8	15	42	52	2.6	8.37	3500	73	81	1.3	432	0.05	0	0	0	5.06968
10	80	14	7.35	301	14	15	7.2	66	2.6	39.6	13.4	1.04	2.5	0.2	4	15	90	46.2	3.78	21.33	2100	71	78	2	346	1.02	0	1	0	0.803063
28	80	21	10.95	134	16	14	6.9	60	5.3	44.8	12.9	0.94	2.7	3.44	10.5	15	80	34	4.25	28.5	2000	67	83	0.2	432	0.05	0	0	0	-1.40221
10	67	11	11.77	115	15	12	8	110	5	43.7	12.1	0.91	3.6	2.87	7.1	15	26	23	1.35	11.46	1900	67	69	1.6	256	0.88	0	1	0	4.59438
8	80	29	17.75	116	13	13	13.4	87	4	47.1	12.1	0.9	3.8	1.9	6.8	15	74	65.1	0.26	30.79	2900	77	70	0.9	342	0.7	1	0	0	4.17553
39	80	20	9.7	155	32	30	6.6	117	6.2	35.8	14.1	1.1	3.9	2.2	10.2	15	24	45.2	2.96	29	1900	78	81	0.8	342	0.8	0	1	0	6.58137
10	23	33	10.83	220	23	35	6.3	131	6.7	40.1	13.7	1.06	3.4	0.09	9.4	15	73	28.9	2.96	10.98	2400	85	67	1.2	375	0.33	0	1	0	7.0723
29	82	70	6.07	213	45	46	9.1	130	8.6	49.2	13.5	1.04	4.3	0.72	3.4	15	25	37.1	2.52	15.75	3900	90	78	1.3	342	0.21	0	1	0	8.17562
47	33	33	7.6	227	57	53	7	118	5.8	35.6	14.5	1.13	3.6	1.02	7.5	15	64	42.1	5.74	4.03	2900	73	81	0.9	308	0.2	0	0	0	7.1866
30	78	70	11.34	301	8	20	6.8	94	5.8	35.8	14.9	1.18	4.4	0.45	7.1	15	53	63.9	1.24	5.12	2100	72	69	1.3	332	0.05	2	0	0	5.38583
20	10	70	10.61	233	17	18	16.5	118	7.7	37.6	13.5	1.02	2.5	0.23	4	15	26	32	4.63	6.92	2300	71	71	1	346	0.08	0	2	0	9.28071
81	8	57	5.44	193	14	11	6.3	125	10.3	34.1	14.5	1.09	4	0.41	3.5	15	72	52.1	4.78	5.35	2800	87	83	0.2	332	0.05	0	0	0	6.9362
34	10	70	10.68	223	33	37	14.1	77	5.5	52.8	13.3	1.43	3.3	0.33	4.1	15	81	37	4.96	9.92	2900	67	87	1.1	351	0.3	2	0	0	8.38548
64	12	70	7.76	237	32	49	16.8	56	4.5	39.9	13	1.4	3.7	1	12.6	15	77	44.8	5.6	4.45	2200	77	84	1.2	348	0.18	0	1	0	5.76269
30	19	13	6.89	311	33	46.6	28.1	54	3.3	39.1	14.7	1.56	4.9	1.09	7.8	15	38	48.8	6.78	8.43	4100	78	97	0.8	314	0.17	2	1	0	8.57104
98	9	72	6.66	243	24	23	26.3	68	5.3	40.7	14.6	1.56	4.4	0.37	4.9	15	52	62	7.25	11.37	3400	67	86	1.2	338	0.02	0	0	0	10.5269
50	27	23	7.39	203	24	25	17.2	61	3.6	40.6	14.4	1.54	3	0.3	4.1	15	100	56.2	4.35	24.33	2000	69	83	1.9	352	0.99	0	1	0	7.73755
63	10	68	10.99	306	26	24	16.9	55	6.3	45.8	13.9	1.44	3.2	0.54	10.6	15	90	44	3.26	31.5	1900	90	88	0.1	338	0.02	0	0	0	5.92819
100	0	17	11.81	264	25	22	18	105	6	44.7	13.1	1.41	4.1	0.97	7.2	15	36	33	5.96	14.46	1800	76	74	1.5	262	0.85	0	1	0	12.119
63	61	35	17.79	270	23	23	23.4	82	5	48.1	13.1	1.4	4.3	1	6.9	15	84	75.1	5.96	33.79	2800	66	75	0.8	348	0.67	1	0	0	10.6649
100	14	18	9.74	286	42	40	16.6	112	7.2	36.8	15.1	1.6	4.4	1.3	10.3	15	34	55.2	5.52	32	1800	78	86	0.7	348	0.77	0	1	0	13.8464
100	44	8	10.87	311	33	45	16.3	126	7.7	41.1	14.7	1.56	3.9	0.19	9.5	15	83	38.9	8.74	13.98	2300	76	72	1.1	381	0.3	0	1	0	14.6211
87	10	69	6.11	144	55	56	19.1	125	9.6	50.2	14.5	1.54	4.8	0.82	3.5	15	35	47.1	4.24	18.75	3800	72	83	1.2	348	0.18	0	1	0	14.9995
100	78	22	7.64	125	47	63	17	113	6.8	36.6	15.5	1.63	4.1	1.12	7.6	15	74	52.1	2.12	7.03	2800	72	86	0.8	314	0.17	0	0	0	14.2295
100	14	52	11.38	126	18	30	16.8	89	6.8	36.8	15.9	1.68	4.9	0.55	7.2	15	63	73.9	2.54	8.12	2000	82	74	1.2	338	0.02	2	0	0	12.2383
43	66	18	10.65	165	27	28	26.5	113	8.7	38.6	14.5	1.52	3	0.33	4.1	15	36	42	1.23	9.92	2200	83	76	0.9	352	0.05	0	2	0	15.125
102	34	22	5.48	304	24	21	16.3	120	11.3	35.1	15.5	1.59	4.5	0.51	3.6	15	82	62.1	1.98	8.35	2700	90	88	0.1	338	0.02	0	0	0	14.3675
478	523	415	10.76	152	50	31	13.2	85	4.9	33.4	15.7	1.16	2.2	1.48	3.5	15	127	159	10.18	5.43	3000	85	60	1.2	345	1.21	2	5	2	6.73846
453	612	667	17.56	132	57	123	9.6	129	10.8	40.4	14.9	1.57	3.1	0.7	110.4	15	237	1928	4.03	13.43	2356	90	66	1.3	342	2.52	7	7	2	12.9167
498	345	935	6.56	27	42	64	19	135	4.7	34.9	14.3	1.46	2.4	0.55	4	13	66	2618	12.27	1.45	4321	45	86	0.9	308	0.88	10	6	2	15.1187
509	412	324	19.94	123	82	23	17.8	123	4.2	36.7	15.2	1.86	2.4	0.37	4	9	134	1953	3.36	16.75	5322	52	70	2.3	432	1.3	13	5	2	16.6932
528	793	649	16.71	133	52	47	9.9	129	4.1	40.6	15.8	2.21	1.5	1.32	4	15	132	75.54	1.87	76.97	2342	71	73	2	346	0.56	6	3	2	16.8625
410	456	800	22.27	128	56	186	16.8	149	2.9	38.4	12.8	2.07	2.4	0.22	4	15	154	665.6	2.85	11.09	2643	94	83	3.2	432	2.05	4	2	2	19.5079
408	647	587	7.18	105	64	170	9	143	4.5	41.4	17.7	1.19	1.9	2.41	4	7	534	279.2	1.25	42.49	2356	67	83	1.6	256	2.87	13	7	2	10.555
493	802	124	9.46	175	375	50	26.6	84	5.3	32.2	14.6	1.43	2	0.47	4	15	219	40.39	11.2	66.7	1345	77	83	1.9	342	2.72	3	2	2	11.6175
390	821	700	16.15	186	107	113	12.7	132	7.7	46.9	17.4	1.23	2.3	0.77	7.1	15	383	327.2	5.09	4.03	2643	134	63	1.8	342	0.37	8	6	2	11.461
429	502	976	9.36	166	63	100	15.8	76	5	43.5	14.9	1.09	2.3	5.42	4	15	329	49.03	3.88	5.12	2467	72	76	2.3	330	0.82	3	1	2	5.64991
447	512	475	10.28	143	113	23	9.7	87	8.9	36.9	16.1	1.18	1.8	3.46	4	15	582	23.96	6.29	119.9	3532	94	76	0.3	243	2.42	1	3	2	5.98791
430	623	235	4.78	173	49	20	14.8	115	7.1	40.7	13.3	1.29	3	3.86	4	12	252	241.2	4.45	228	2356	79	83	0.5	286	0.33	0	3	2	11.2535
420	683	515	3.52	137	60	19	35.6	85	3.1	38.9	15	1.01	3.2	2.7	7.3	15	148	31.95	23.7	6.92	2453	76	66	1.2	264	0.79	5	8	4	8.93785
581	722	744	4.77	126	151	19	12	70	3.2	39.9	15.7	1.18	1.9	4.08	4	15	408	20	6.22	38.89	2456	48	86	0.9	312	1.87	3	2	2	4.71158
534	740	815	4.36	239	100	14	12.1	64	3.7	36.5	17.7	1.25	2	2.88	4	15	154	75.49	3.2	5.35	2754	86	100	0.4	234	4.1	0	1	3	4.5308
464	345	933	25.93	210	150	30	5.8	85	8.1	40.1	15.3	0.96	3.3	0.44	10.2	15	896	77.49	5.24	82.07	2400	78	93	0.6	309	0.93	5	1	2	1.51044
500	265	668	9.85	168	203	20	9.2	135	5.7	39.7	13.9	1.47	2	0.37	4	15	136	1806	5.09	71.15	2400	55	86	2.3	271	1.62	7	2	4	12.4538
498	871	1226	21.72	171	104	64	8.7	69	9.6	38.5	21.4	1.14	1.7	0.53	10	15	2918	22.05	3.78	64.22	3532	89	70	1.2	231	1.52	2	1	3	2.97205
200	827	946	11.44	166	95	56	17.9	153	5.8	43	24.5	1.45	1.7	0.48	5	7	205	788.5	4.25	54.74	2400	65	73	1.4	215	12.12	15	5	2	16.0141
463	757	915	11.32	220	81	78	9.4	75	6.6	41.5	23.3	1.2	2.1	0.24	7	15	853	186.2	3.35	176.7	2400	129	83	1.3	212	3.26	2	1	2	4.63701
500	793	724	15.29	85	160	8	14.3	123	5.3	39.9	14.9	1.26	3.2	0.34	4	15	159	1084	5.26	68.37	3456	84	90	0.4	312	0.19	1	2	3	11.5036
463	401	512	8.99	306	102	18	10.1	101	3	42.8	14.6	1.25	2.6	6.32	4.5	15	3139	136	2.96	176.8	2400	68	80	0.2	298	1.26	0	2	3	8.21406
643	423	741	12.31	264	128	18	41.4	163	7.7	48.6	18.8	1.17	2.1	0.43	4	13	4493	264.9	2.52	112.1	2400	100	70	3.2	261	1.35	4	6	2	17.3864
318	412	812	5.26	270	198	6	16.5	73	8.1	34.2	18	1.11	2.3	6.54	4	15	1174	20	5.74	40.79	2400	76	86	1.2	245	1.43	0	1	4	5.632
487	409	930	10.32	286	105	66	19.4	70	7.6	42.5	24.3	1.7	2.6	0.34	7.1	8	863	196.2	6.35	179.7	3000	134	88	2.3	294	2.43	5	4	3	10.6166
164	756	863	16.29	311	91	88	24.3	118	6.3	40.9	15.9	1.76	3.7	0.44	4.6	7	169	1094	8.26	71.37	2356	89	75	2.4	312	3.65	4	5	2	16.8537
500	793	300	9.99	144	170	18	20.1	96	4	43.8	15.6	1.75	3.1	6.42	5.1	13	3149	146	5.96	179.8	4321	73	85	3.2	341	1.98	3	5	2	14.098
443	793	300	4.31	125	112	28	51.4	158	8.7	49.6	19.8	1.67	2.6	0.53	4.1	12	4503	274.9	5.52	115.1	5322	105	75	3.2	276	4.12	7	9	3	21.8913
354	780	300	5.26	126	138	28	26.5	68	9.1	35.2	19	1.61	2.8	6.64	12.3	10	1184	30	8.74	43.79	2342	81	71	1.2	201	0.24	3	4	2	10.9089
246	915	1500	6.98	118	190	61	20.6	84	6	41	17.6	1.39	2.1	20	135	4	4804	396.4	239	45.3	2364	76	65	2.4	245	1.5	16	11	5	10.3335
483	1167	2150	5.35	176	220	153	44	185	4.2	36	12.9	2.01	1.7	20	135	15	123	3000	30.61	135.32	2635	90	80	2.5	342	1.7	18	5	6	24.8889
930	1435	4000	9.43	106	613	94	26.1	195	4.8	43.1	13.7	1.43	2.5	20	135	15	1510	2028	52.9	2813	2575	90	80	1.5	308	19.94	20	5	5	19.6054
863	2334	2150	10.65	143	7939	53	32.7	84	3	38.7	18.1	1.3	2.8	20	135	6	1227	262.3	49.8	4916	3462	65	86	2.3	232	3.23	18	5	7	11.3304
713	1149	4000	11.87	255	206	77	77	138	11.8	36	28.9	2.49	2.86	20	64.7	4	1254	212.6	15.89	1019	4632	78	80	2	346	4.77	16	8	7	26.5977
943	1300	4000	9.22	49	1979	216	40.6	147	6.8	36	16.8	2.45	2.6	10.27	135	7	2752	538.8	20.6	1097	2477	60	53	3.2	132	6.77	16	13	5	24.6016
912	2078	3350	7.47	198	228	200	74.6	88	4.3	36.7	19.6	1.33	2.5	10.11	53.5	3	8669	1318	16.12	280.4	3522	94	53	2.7	256	4.84	19	12	6	15.1488
721	624	4000	7.75	91	837	80	37.9	121	8.8	38.4	26.6	1.61	2.2	20	13.4	5	1264	1666	46.47	628.6	2364	126	106	1.9	242	7.05	23	10	6	17.7764
697	1200	4000	13.67	144	7024	143	14.5	69	2.5	38.8	16	1.52	2.3	20	15.3	4	21106	1227	28.1	117	2356	52	80	1.8	342	2.03	8	6	6	8.12501
973	1476	1150	13.41	115	85	130	27.6	201	5.4	34	27	2.86	2.2	20	48.6	15	3414	1254	38.23	506.3	2677	66	80	2.3	230	3.11	9	5	6	27.8699
1172	975	4100	11.89	59	164	53	18.5	82	7.5	37.7	16.9	0.97	1.9	20	30.1	15	317	146	7.08	439.8	2695	67	76	1.2	243	3	14	4	7	5.6671
1232	1735	1650	13.6	138	120	50	14.8	105	7.6	38.1	23	1.05	2.1	2.21	15.6	7	1994	2567	87.18	505.7	2468	99	120	1.5	386	3.26	15	5	6	8.07731
512	1015	3900	8.43	55	112	49	33.9	119	6.3	40.6	17.3	1.42	3	20	17	7	2908	3000	18.86	800.6	3562	110	50	1.2	164	4.53	17	12	6	15.7889
741	1244	500	24.33	33	14593	49	103.6	186	11.2	31.1	38.8	1.35	1.4	14.55	23.9	7	5483	557.3	12.81	895.6	296	80	100	4.3	206	1.21	17	16	7	23.7196
812	1315	400	18.02	76	446	44	64.7	153	7	41.4	84	2.4	0.7	7.64	135	8	8235	641	20.41	920.3	357	138	60	2.6	142	0.98	17	17	6	26.515
664	1433	500	5.84	92	3	60	21.2	108	6.8	30.5	28.6	2.42	1	20	7.7	7	19705	1746	14.77	352.4	2744	138	73	3.4	265	2.34	21	9	8	19.0571
932	2366	600	7.78	24	64	50	95.6	222	8.7	36.6	38.4	2.82	0.9	13.35	12.2	10	9000	1970	37.55	106.6	132	110	43	2	203	1.23	19	19	6	33.3593
831	1726	950	9.51	29	167	94	443.7	206	34.8	44.1	16.9	4.18	3.2	20	11.8	7	3212	935.1	23.46	870	0	87	63	12	265	5.21	27	22	7	42.8537
646	2446	450	8.47	84	1367	86	12.4	345	6.4	34.7	25.8	11.09	0.7	13.01	11.3	5	653	3000	24.34	1000.3	357	178	43	3.5	254	2.34	14	18	5	45.1941
797	3415	1350	12.56	39	6527	108	52.5	383	6.6	37.7	26.4	3.81	2.3	4.29	13	15	5460	1017	12.45	34.21	234	133	52	7.8	243	2.13	17	17	6	39.6828
1575	1224	500	14.43	75	63	38	54.1	231	12.3	32.1	22.3	4.46	1.2	15.6	6.2	7	234	453	23.4	43.1	252	97	61	13.2	198	3.43	13	18	6	36.7217
