# Supplementary material for: Proteomic profiling of serum exosomes reveals acute phase response and promotion of inflammatory and platelet activation pathways in patients with heat stroke
Source: PeerJ. 2023 Dec 13;11:e16590. doi: 10.7717/peerj.16590 (PMC10725172; doi:10.7717/peerj.16590)
Supplement: Supplemental Information 9 [file peerj-11-16590-s009.xlsx]

## Sheet: Proteins
Protein IDs	Gene Name	Fasta headers	Number of proteins	Peptides	Razor + unique peptides	Unique peptides	Sequence coverage [%]	Mol. weight [kDa]	LFQ intensity YZQ	LFQ intensity PTJ	LFQ intensity GXJ	LFQ intensity SW	LFQ intensity CJQ	LFQ intensity CWK	LFQ intensity C	LFQ intensity D	LFQ intensity Y	LFQ intensity H	LFQ intensity NC1	LFQ intensity NC2	LFQ intensity NC3	LFQ intensity NC4	LFQ intensity NC5	LFQ intensity NC6
A0A075B6H7	IGKV3-7	sp|A0A075B6H7|KV37_HUMAN Probable non-functional immunoglobulin kappa variable 3-7 OS=Homo sapiens OX=9606 GN=IGKV3-7 PE=1 SV=1	1	4	3	3	42.2	12.783				1435800									1147600
A0A075B6H9	IGLV4-69	sp|A0A075B6H9|LV469_HUMAN Immunoglobulin lambda variable 4-69 OS=Homo sapiens OX=9606 GN=IGLV4-69 PE=1 SV=1	1	2	2	2	27.7	12.773	77434	580100	1351800	871280	835550	734430	847930	829160	1840200	996610	468620	1686500	648870	1285500	644850	827790
A0A075B6I0	IGLV8-61	sp|A0A075B6I0|LV861_HUMAN Immunoglobulin lambda variable 8-61 OS=Homo sapiens OX=9606 GN=IGLV8-61 PE=3 SV=7	1	2	2	2	14.8	12.814	448360	1575000	951860	1731200	1699600	1879900	1680400	238170	1463200	1439200	1295400	1555500	1207800		1283100	297330
A0A075B6I1	IGLV4-60	sp|A0A075B6I1|LV460_HUMAN Immunoglobulin lambda variable 4-60 OS=Homo sapiens OX=9606 GN=IGLV4-60 PE=3 SV=1	1	3	3	3	35	12.987	132130	47432		163350			147860		49699	25423	25934			115840	18404
A0A075B6I9	IGLV7-46	sp|A0A075B6I9|LV746_HUMAN Immunoglobulin lambda variable 7-46 OS=Homo sapiens OX=9606 GN=IGLV7-46 PE=3 SV=4	1	3	3	1	21.4	12.468	1109000	1518300	1456700	1902100	1465700	1376600	1192300	679230	1999800	2232100	1109700	1621000	832150	1878500	697720	1583700
A0A075B6J1	IGLV5-37	sp|A0A075B6J1|LV537_HUMAN Immunoglobulin lambda variable 5-37 OS=Homo sapiens OX=9606 GN=IGLV5-37 PE=3 SV=1	1	1	1	1	8.9	13.277
A0A075B6J9	IGLV2-18	sp|A0A075B6J9|LV218_HUMAN Immunoglobulin lambda variable 2-18 OS=Homo sapiens OX=9606 GN=IGLV2-18 PE=3 SV=2	1	3	3	2	24.6	12.412	316100	295580	403510	234960	154970	103980	103390	100810	298260	397630	408600	165100	144840	171290	207980	368380
A0A075B6K2	IGLV3-12	sp|A0A075B6K2|LV312_HUMAN Immunoglobulin lambda variable 3-12 OS=Homo sapiens OX=9606 GN=IGLV3-12 PE=3 SV=2	1	3	2	2	30.4	12.387							25481				48120
A0A075B6K4	IGLV3-10	sp|A0A075B6K4|LV310_HUMAN Immunoglobulin lambda variable 3-10 OS=Homo sapiens OX=9606 GN=IGLV3-10 PE=3 SV=2	1	5	4	1	35.7	12.441	3877300	3550700	1981100	4817600	4701500	1526800	3376200	5529400	4094700	3088500	781510	4913100	3931000	3524800	2329800	3138300
A0A075B6K5	IGLV3-9	sp|A0A075B6K5|LV39_HUMAN Immunoglobulin lambda variable 3-9 OS=Homo sapiens OX=9606 GN=IGLV3-9 PE=3 SV=1	1	5	3	3	40	12.332	310860	350140		306750	199710	125560		381530	298640	192460	123200	308220	225140	286030	209710	289360
A0A075B6K6	IGLV4-3	sp|A0A075B6K6|LV403_HUMAN Immunoglobulin lambda variable 4-3 OS=Homo sapiens OX=9606 GN=IGLV4-3 PE=3 SV=1	1	2	2	2	24.6	13.33		20001				17237			18013	16611	10679	39609		91215
A0A075B6P5;P01615	IGKV2-28; IGKV2D-28	sp|A0A075B6P5|KV228_HUMAN Immunoglobulin kappa variable 2-28 OS=Homo sapiens OX=9606 GN=IGKV2-28 PE=3 SV=1;sp|P01615|KVD28_HUMAN Immunoglobulin kappa variable 2D-28 OS=Homo sapiens OX=9606 GN=IGKV2D-28 PE=1 SV=2	2	3	2	2	40	12.957	93283	227910	221270	237030	168680	85181	103050	134410	410170	236370	219480	246520	286820	387580	178030	417390
A0A075B6Q5	IGHV3-64	sp|A0A075B6Q5|HV364_HUMAN Immunoglobulin heavy variable 3-64 OS=Homo sapiens OX=9606 GN=IGHV3-64 PE=3 SV=1	1	4	3	2	53.4	12.891	137710	258860	494710		226470			434940	414180	167160	226200	393540	89371	135450	111780	653020
A0A075B6R2	IGHV4-4	sp|A0A075B6R2|HV404_HUMAN Immunoglobulin heavy variable 4-4 OS=Homo sapiens OX=9606 GN=IGHV4-4 PE=3 SV=2	1	2	1	1	31.6	12.848
A0A0C4DH68;A0A075B6R9	IGKV2-24; IGKV2D-24	sp|A0A0C4DH68|KV224_HUMAN Immunoglobulin kappa variable 2-24 OS=Homo sapiens OX=9606 GN=IGKV2-24 PE=3 SV=1;sp|A0A075B6R9|KVD24_HUMAN Probable non-functional immunoglobulin kappa variable 2D-24 OS=Homo sapiens OX=9606 GN=IGKV2D-24 PE=1 SV=1	2	2	2	2	27.5	13.079	1027900	1065800	1409500	2395500	1335100		696630	1248300	1474000	1674200	1109900	2001600	1014500	1982500	1639600	1317900
A0A075B6S2;A0A0A0MRZ7	IGKV2D-29	sp|A0A075B6S2|KVD29_HUMAN Immunoglobulin kappa variable 2D-29 OS=Homo sapiens OX=9606 GN=IGKV2D-29 PE=3 SV=1	2	4	1	1	40	13.143		54376		94377				57932
A0A075B6S5	IGKV1-27	sp|A0A075B6S5|KV127_HUMAN Immunoglobulin kappa variable 1-27 OS=Homo sapiens OX=9606 GN=IGKV1-27 PE=3 SV=1	1	3	2	2	29.1	12.711	57835	96867	133010	131340	312300	120540	100050	85604	197820	164710	157400	89728	138140	144700	144990	115480
A0A075B6S6;P06310	IGKV2D-30; IGKV2-30	sp|A0A075B6S6|KVD30_HUMAN Immunoglobulin kappa variable 2D-30 OS=Homo sapiens OX=9606 GN=IGKV2D-30 PE=3 SV=1;sp|P06310|KV230_HUMAN Immunoglobulin kappa variable 2-30 OS=Homo sapiens OX=9606 GN=IGKV2-30 PE=3 SV=2	2	3	2	2	36.7	13.215		81214	29488	98696	137260	37455			158160	70862		358900	77734	275370	74362	59761
P0DSN7;A0A075B6S9	IGKV1D-37; IGKV1-37	sp|P0DSN7|KVD37_HUMAN Probable non-functional immunoglobulinn kappa variable 1D-37 OS=Homo sapiens OX=9606 GN=IGKV1D-37 PE=1 SV=1;sp|A0A075B6S9|KV137_HUMAN Probable non-functional immunoglobulinn kappa variable 1-37 OS=Homo sapiens OX=9606 GN=IGKV1-37 PE=1	2	1	1	1	13.7	12.688
A0A087WSX0;A0A075B6I7	IGLV5-45	sp|A0A087WSX0|LV545_HUMAN Immunoglobulin lambda variable 5-45 OS=Homo sapiens OX=9606 GN=IGLV5-45 PE=3 SV=1	2	4	4	2	21.1	13.162	191680	255310	279250	454410	205250	202220	170430	190080	342880	222500	174320	194140	364290	334170	155690	206800
A0A087WSY6	IGKV3D-15	sp|A0A087WSY6|KVD15_HUMAN Immunoglobulin kappa variable 3D-15 OS=Homo sapiens OX=9606 GN=IGKV3D-15 PE=3 SV=6	1	3	1	1	26.1	12.534
A0A087WSZ0	IGKV1D-8	sp|A0A087WSZ0|KVD08_HUMAN Immunoglobulin kappa variable 1D-8 OS=Homo sapiens OX=9606 GN=IGKV1D-8 PE=3 SV=6	1	1	1	1	16.2	12.837		22278		46228	64749		91630		37999	25786	19861	52003	24808	31150	29383	75771
P01614;A0A087WW87	IGKV2D-40; IGKV2-40	sp|P01614|KVD40_HUMAN Immunoglobulin kappa variable 2D-40 OS=Homo sapiens OX=9606 GN=IGKV2D-40 PE=1 SV=2;sp|A0A087WW87|KV240_HUMAN Immunoglobulin kappa variable 2-40 OS=Homo sapiens OX=9606 GN=IGKV2-40 PE=3 SV=2	2	3	2	2	34.7	13.31		224890				219350	377560	273410	288690		560820		255310	339400	143580
A0A0A0MRZ8;P04433	IGKV3D-11; IGKV3-11	sp|A0A0A0MRZ8|KVD11_HUMAN Immunoglobulin kappa variable 3D-11 OS=Homo sapiens OX=9606 GN=IGKV3D-11 PE=3 SV=6;sp|P04433|KV311_HUMAN Immunoglobulin kappa variable 3-11 OS=Homo sapiens OX=9606 GN=IGKV3-11 PE=1 SV=1	2	3	3	3	26.1	12.625	3675300	4649900	4894800	3099800	5787600	4582600	3151800	4529100	6570400	7226300	5662800	5777100	4392800	5810800	5254600	6401800
A0A0A0MS14	IGHV1-45	sp|A0A0A0MS14|HV145_HUMAN Immunoglobulin heavy variable 1-45 OS=Homo sapiens OX=9606 GN=IGHV1-45 PE=3 SV=1	1	2	2	2	17.1	13.508					302170			215690	194330			175270
A0A0A0MS15	IGHV3-49	sp|A0A0A0MS15|HV349_HUMAN Immunoglobulin heavy variable 3-49 OS=Homo sapiens OX=9606 GN=IGHV3-49 PE=3 SV=1	1	5	4	4	52.9	13.056	412510	659410	1036800	645530	1027800	526350	889780	653170	692540	458920	941770	652850	667320	405920	273750	1087600
A0A0A0MT36;A0A0C4DH26	IGKV6D-21	sp|A0A0A0MT36|KVD21_HUMAN Immunoglobulin kappa variable 6D-21 OS=Homo sapiens OX=9606 GN=IGKV6D-21 PE=3 SV=1	2	4	4	1	36	12.34	287100	331800	390990	213990	392180	475050	537270	512750	711820	689720	356480	345330	483980	296630	236830	606600
A0A0B4J1U3	IGLV1-36	sp|A0A0B4J1U3|LV136_HUMAN Immunoglobulin lambda variable 1-36 OS=Homo sapiens OX=9606 GN=IGLV1-36 PE=1 SV=5	1	1	1	1	13.7	12.478			179510	109990	102780	72065		123360			76871	112580	81460	204310	78082	79326
A0A0B4J1U7	IGHV6-1	sp|A0A0B4J1U7|HV601_HUMAN Immunoglobulin heavy variable 6-1 OS=Homo sapiens OX=9606 GN=IGHV6-1 PE=3 SV=1	1	4	4	4	39.7	13.481	886520	870530	1473000	706200	810760	961550	976390	1574200	2734200	1912200	902500	1480200	982220	1262000	2220400	1286300
A0A0B4J1V0	IGHV3-15	sp|A0A0B4J1V0|HV315_HUMAN Immunoglobulin heavy variable 3-15 OS=Homo sapiens OX=9606 GN=IGHV3-15 PE=3 SV=1	1	5	4	4	43.7	12.926	521440	662040	783540	875780	1073600	709560	979360	1391100	1055500	912720	929040	842420	893690	899130	706880	678300
A0A0B4J1V1	IGHV3-21	sp|A0A0B4J1V1|HV321_HUMAN Immunoglobulin heavy variable 3-21 OS=Homo sapiens OX=9606 GN=IGHV3-21 PE=1 SV=1	1	4	2	2	53.8	12.839							6157.7		24778
A0A0B4J1V2	IGHV2-26	sp|A0A0B4J1V2|HV226_HUMAN Immunoglobulin heavy variable 2-26 OS=Homo sapiens OX=9606 GN=IGHV2-26 PE=3 SV=1	1	3	3	3	36.1	13.182	76653	69058		65687	174170	158080	202040		135810	144860	93689	182820	51632	126860	126170	103990
A0A0B4J1V6	IGHV3-73	sp|A0A0B4J1V6|HV373_HUMAN Immunoglobulin heavy variable 3-73 OS=Homo sapiens OX=9606 GN=IGHV3-73 PE=3 SV=1	1	6	6	4	51.3	12.858	1271800	1339500	1379900	1530900	2076700	1142400	1052700	993240	1221700	3185300	1116800	1120300	1488600	1050500	1193600	1477100
A0A0B4J1X5;A0A0J9YVY3	IGHV3-74	sp|A0A0B4J1X5|HV374_HUMAN Immunoglobulin heavy variable 3-74 OS=Homo sapiens OX=9606 GN=IGHV3-74 PE=3 SV=1	2	4	2	2	37.6	12.839	160180		442890	366280	695540	396140	312720	266800	504570	738450	556420	509850	632890	410200	347690	469720
A0A0B4J1X8	IGHV3-43	sp|A0A0B4J1X8|HV343_HUMAN Immunoglobulin heavy variable 3-43 OS=Homo sapiens OX=9606 GN=IGHV3-43 PE=3 SV=1	1	4	3	3	35.6	13.077	317570	327920	263510	236660	413500	300170	283630	919500	379670	678080	226780	553820	685510	490000	292790	618050
A0A0B4J1Y8	IGLV9-49	sp|A0A0B4J1Y8|LV949_HUMAN Immunoglobulin lambda variable 9-49 OS=Homo sapiens OX=9606 GN=IGLV9-49 PE=1 SV=1	1	3	3	3	22	13.024	74388	196850	335950	338370	184540	123390		191380	193570	212840	190220	119180	231300	260350	97414	221770
A0A0B4J1Y9	IGHV3-72	sp|A0A0B4J1Y9|HV372_HUMAN Immunoglobulin heavy variable 3-72 OS=Homo sapiens OX=9606 GN=IGHV3-72 PE=3 SV=1	1	5	4	4	51.3	13.203	1016300	1337300	1851100	1769800	1454700	1330600	1163000	1577900	1825900	1591800	1333800	1558700	1566800	1467000	1423000	1887200
P0DP09;A0A0B4J2D9	IGKV1-13; IGKV1D-13	sp|P0DP09|KV113_HUMAN Immunoglobulin kappa variable 1-13 OS=Homo sapiens OX=9606 GN=IGKV1-13 PE=3 SV=1;sp|A0A0B4J2D9|KVD13_HUMAN Immunoglobulin kappa variable 1D-13 OS=Homo sapiens OX=9606 GN=IGKV1D-13 PE=3 SV=1	2	2	2	2	29.1	12.569		115670	82480		364610		141920			142470	272220	42803		95855	70388	109700
A0A0B4J2H0	IGHV1-69D	sp|A0A0B4J2H0|HV69D_HUMAN Immunoglobulin heavy variable 1-69D OS=Homo sapiens OX=9606 GN=IGHV1-69D PE=1 SV=1	1	3	3	1	39.3	12.66	2285200	1235500		9627700	5455200	6130800	4780600	3838800		4461900	2056700	3435000	4986900	4357200	3618700	3105300
A0A0C4DH24	IGKV6-21	sp|A0A0C4DH24|KV621_HUMAN Immunoglobulin kappa variable 6-21 OS=Homo sapiens OX=9606 GN=IGKV6-21 PE=3 SV=1	1	4	1	1	36	12.43
A0A0C4DH25	IGKV3D-20	sp|A0A0C4DH25|KVD20_HUMAN Immunoglobulin kappa variable 3D-20 OS=Homo sapiens OX=9606 GN=IGKV3D-20 PE=3 SV=1	1	3	2	2	40.5	12.515
A0A0C4DH29	IGHV1-3	sp|A0A0C4DH29|HV103_HUMAN Immunoglobulin heavy variable 1-3 OS=Homo sapiens OX=9606 GN=IGHV1-3 PE=3 SV=1	1	3	2	2	35	13.008												807740		776870
A0A0C4DH31	IGHV1-18	sp|A0A0C4DH31|HV118_HUMAN Immunoglobulin heavy variable 1-18 OS=Homo sapiens OX=9606 GN=IGHV1-18 PE=3 SV=1	1	3	2	2	36.8	12.82	423580	644540	733690	610380	1006700	763800	1056200	821410	1011700	1212200	1575800	1237900	670040	974120	606300	745860
A0A0C4DH32	IGHV3-20	sp|A0A0C4DH32|HV320_HUMAN Immunoglobulin heavy variable 3-20 OS=Homo sapiens OX=9606 GN=IGHV3-20 PE=3 SV=2	1	3	2	2	35	12.673		69198		51905	91328	104030	145600	49274	106090	247010	46010	130480	96787	72322	59081	59695
A0A0C4DH33	IGHV1-24	sp|A0A0C4DH33|HV124_HUMAN Immunoglobulin heavy variable 1-24 OS=Homo sapiens OX=9606 GN=IGHV1-24 PE=3 SV=1	1	3	3	3	47	12.824	152250	153450	166960	270940	496200	296500	322500	310350	358440	305960	88004	161060	155960	292850	248300	348140
A0A0C4DH34	IGHV4-28	sp|A0A0C4DH34|HV428_HUMAN Immunoglobulin heavy variable 4-28 OS=Homo sapiens OX=9606 GN=IGHV4-28 PE=3 SV=1	1	2	2	2	21.4	13.124	759680	727950	750440	689410	470210	444840	606560	1078600	1217700	654600	650750	662500	830110	712090	685240	861350
A0A0C4DH35	IGHV3-35	sp|A0A0C4DH35|HV335_HUMAN Probable non-functional immunoglobulin heavy variable 3-35 OS=Homo sapiens OX=9606 GN=IGHV3-35 PE=1 SV=1	1	2	2	2	18.8	12.81
A0A0C4DH36	IGHV3-38	sp|A0A0C4DH36|HV338_HUMAN Probable non-functional immunoglobulin heavy variable 3-38 OS=Homo sapiens OX=9606 GN=IGHV3-38 PE=1 SV=1	1	2	2	2	19	12.758	253740	243450	248380	504190	462240	386510	255490	260900	318220	404190	344280	397170	372420	355740	258160	417570
A0A0C4DH38	IGHV5-51	sp|A0A0C4DH38|HV551_HUMAN Immunoglobulin heavy variable 5-51 OS=Homo sapiens OX=9606 GN=IGHV5-51 PE=3 SV=1	1	4	4	2	47	12.674	1412400	1557500	1489500	1271100	2770700	2001200	2135600	1618000	1857900	2532600	2034300	2508300	1776900	1724800	1273200	1473800
A0A0C4DH39	IGHV1-58	sp|A0A0C4DH39|HV158_HUMAN Immunoglobulin heavy variable 1-58 OS=Homo sapiens OX=9606 GN=IGHV1-58 PE=3 SV=1	1	2	2	2	25.6	13.005
A0A0C4DH41;P01825;P0DP06;P01824;P0DP07	IGHV4-61; IGHV4-59	sp|A0A0C4DH41|HV461_HUMAN Immunoglobulin heavy variable 4-61 OS=Homo sapiens OX=9606 GN=IGHV4-61 PE=3 SV=1;sp|P01825|HV459_HUMAN Immunoglobulin heavy variable 4-59 OS=Homo sapiens OX=9606 GN=IGHV4-59 PE=1 SV=2;sp|P0DP06|HVD34_HUMAN Immunoglobulin heavy var	5	3	1	1	39	13.066
A0A0C4DH43;P01814	IGHV2-70D	sp|A0A0C4DH43|HV70D_HUMAN Immunoglobulin heavy variable 2-70D OS=Homo sapiens OX=9606 GN=IGHV2-70D PE=3 SV=1	2	3	2	2	36.1	13.312								82718	75409					55524		86483
A0A0C4DH67;A0A0C4DH69	IGKV1-8; IGKV1-9	sp|A0A0C4DH67|KV108_HUMAN Immunoglobulin kappa variable 1-8 OS=Homo sapiens OX=9606 GN=IGKV1-8 PE=3 SV=1;sp|A0A0C4DH69|KV109_HUMAN Immunoglobulin kappa variable 1-9 OS=Homo sapiens OX=9606 GN=IGKV1-9 PE=3 SV=1	2	4	4	3	42.6	12.537	984960	1284000	1400900	1106600	1755600	1956500	1303300	1659400	1811300	2272400	1432800	2183600	1706300	2122800	1383800	1540400
A0A0C4DH72	IGKV1-6	sp|A0A0C4DH72|KV106_HUMAN Immunoglobulin kappa variable 1-6 OS=Homo sapiens OX=9606 GN=IGKV1-6 PE=3 SV=1	1	5	1	0	29.1	12.697
A0A0C4DH73;P01611	IGKV1-12; IGKV1D-12	sp|A0A0C4DH73|KV112_HUMAN Immunoglobulin kappa variable 1-12 OS=Homo sapiens OX=9606 GN=IGKV1-12 PE=3 SV=1;sp|P01611|KVD12_HUMAN Immunoglobulin kappa variable 1D-12 OS=Homo sapiens OX=9606 GN=IGKV1D-12 PE=1 SV=2	2	3	2	1	29.1	12.645									164220	9698.4	3374.3	7973.4		6594.3	8014.2
A0A0G2JS06	IGLV5-39	sp|A0A0G2JS06|LV539_HUMAN Immunoglobulin lambda variable 5-39 OS=Homo sapiens OX=9606 GN=IGLV5-39 PE=3 SV=1	1	3	1	1	20.3	13.394
A0A0J9YX35	IGHV3-64D	sp|A0A0J9YX35|HV64D_HUMAN Immunoglobulin heavy variable 3-64D OS=Homo sapiens OX=9606 GN=IGHV3-64D PE=3 SV=1	1	3	2	2	37.6	12.822	828160	549860	314580	764220	1105400	639150	906340	474280	605450	824990	1192800	1131800	371700	832910	595090	1052900
A0A0J9YXX1	IGHV5-10-1	sp|A0A0J9YXX1|HV5X1_HUMAN Immunoglobulin heavy variable 5-10-1 OS=Homo sapiens OX=9606 GN=IGHV5-10-1 PE=3 SV=1	1	4	2	2	47	12.772		153560			467990	647870	449200				353220	215560
A0M8Q6	IGLC7	sp|A0M8Q6|IGLC7_HUMAN Immunoglobulin lambda constant 7 OS=Homo sapiens OX=9606 GN=IGLC7 PE=1 SV=3	1	4	2	2	50.9	11.253	469630		92021	221510	106800		113100	141380	243660		147090	219400		209270	111050
A2NJV5	IGKV2-29	sp|A2NJV5|KV229_HUMAN Immunoglobulin kappa variable 2-29 OS=Homo sapiens OX=9606 GN=IGKV2-29 PE=3 SV=2	1	4	4	1	40	13.085	7853800	6403800	7887500	4056200	5302200	9026000	11810000	5436400	13345000	17574000	15962000	3611500	13216000	14716000	4145700	17817000
A5PLL1	ANKRD34B	sp|A5PLL1|AN34B_HUMAN Ankyrin repeat domain-containing protein 34B OS=Homo sapiens OX=9606 GN=ANKRD34B PE=2 SV=3	1	1	1	1	1.9	56.414
A6ND91	ASPDH	sp|A6ND91|ASPD_HUMAN Putative L-aspartate dehydrogenase OS=Homo sapiens OX=9606 GN=ASPDH PE=1 SV=2	1	6	6	6	31.8	29.946
A6NHL2	TUBAL3	sp|A6NHL2|TBAL3_HUMAN Tubulin alpha chain-like 3 OS=Homo sapiens OX=9606 GN=TUBAL3 PE=1 SV=2	1	4	1	1	9.4	49.908
Q99613;B5ME19	EIF3C; EIF3CL	sp|Q99613|EIF3C_HUMAN Eukaryotic translation initiation factor 3 subunit C OS=Homo sapiens OX=9606 GN=EIF3C PE=1 SV=1;sp|B5ME19|EIFCL_HUMAN Eukaryotic translation initiation factor 3 subunit C-like protein OS=Homo sapiens OX=9606 GN=EIF3CL PE=1 SV=1	2	3	3	3	3.8	105.34
Q12965;O00160	MYO1E; MYO1F	sp|Q12965|MYO1E_HUMAN Unconventional myosin-Ie OS=Homo sapiens OX=9606 GN=MYO1E PE=1 SV=2;sp|O00160|MYO1F_HUMAN Unconventional myosin-If OS=Homo sapiens OX=9606 GN=MYO1F PE=1 SV=3	2	2	2	2	2.6	127.06
O00187	MASP2	sp|O00187|MASP2_HUMAN Mannan-binding lectin serine protease 2 OS=Homo sapiens OX=9606 GN=MASP2 PE=1 SV=4	1	6	6	6	10.2	75.702	81106	124310	47285	78999	58591	86955	85307	142210	62978	86144	76847	85013	67347	112150	151390	107900
O00231	PSMD11	sp|O00231|PSD11_HUMAN 26S proteasome non-ATPase regulatory subunit 11 OS=Homo sapiens OX=9606 GN=PSMD11 PE=1 SV=3	1	9	9	9	26.1	47.463
O00232	PSMD12	sp|O00232|PSD12_HUMAN 26S proteasome non-ATPase regulatory subunit 12 OS=Homo sapiens OX=9606 GN=PSMD12 PE=1 SV=3	1	10	10	10	29.6	52.904
O00299	CLIC1	sp|O00299|CLIC1_HUMAN Chloride intracellular channel protein 1 OS=Homo sapiens OX=9606 GN=CLIC1 PE=1 SV=4	1	2	2	2	11.2	26.922
O00303	EIF3F	sp|O00303|EIF3F_HUMAN Eukaryotic translation initiation factor 3 subunit F OS=Homo sapiens OX=9606 GN=EIF3F PE=1 SV=1	1	3	3	3	11.5	37.563
O00391	QSOX1	sp|O00391|QSOX1_HUMAN Sulfhydryl oxidase 1 OS=Homo sapiens OX=9606 GN=QSOX1 PE=1 SV=3	1	6	6	6	13.3	82.577	106660	74275	106830	130300	113390	93241	133080	146250	118230	92361	182280	90439	117860	91249	95945	90497
O00487	PSMD14	sp|O00487|PSDE_HUMAN 26S proteasome non-ATPase regulatory subunit 14 OS=Homo sapiens OX=9606 GN=PSMD14 PE=1 SV=1	1	2	2	2	9.4	34.577
O00560	SDCBP	sp|O00560|SDCB1_HUMAN Syntenin-1 OS=Homo sapiens OX=9606 GN=SDCBP PE=1 SV=1	1	2	2	2	9.7	32.444		21499				12099
O00602	FCN1	sp|O00602|FCN1_HUMAN Ficolin-1 OS=Homo sapiens OX=9606 GN=FCN1 PE=1 SV=2	1	4	3	3	17.5	35.078	40103	79074	76799	16164	105510	38401		15628	13280	43107			30016		16074
O14579	COPE	sp|O14579|COPE_HUMAN Coatomer subunit epsilon OS=Homo sapiens OX=9606 GN=COPE PE=1 SV=3	1	1	1	1	3.6	34.482
O14744	PRMT5	sp|O14744|ANM5_HUMAN Protein arginine N-methyltransferase 5 OS=Homo sapiens OX=9606 GN=PRMT5 PE=1 SV=4	1	3	3	3	6.1	72.683
O14773	TPP1	sp|O14773|TPP1_HUMAN Tripeptidyl-peptidase 1 OS=Homo sapiens OX=9606 GN=TPP1 PE=1 SV=2	1	1	1	1	2.5	61.247
O14786	NRP1	sp|O14786|NRP1_HUMAN Neuropilin-1 OS=Homo sapiens OX=9606 GN=NRP1 PE=1 SV=3	1	2	2	2	3.4	103.13
O14791	APOL1	sp|O14791|APOL1_HUMAN Apolipoprotein L1 OS=Homo sapiens OX=9606 GN=APOL1 PE=1 SV=5	1	22	22	22	46.2	43.974	1016100	848220	885640	1854200	1095800	1249000	1078800	917610	1094200	1319400	1089100	1906500	1049300	2040400	1064500	1255600
O14818;Q8TAA3	PSMA7	sp|O14818|PSA7_HUMAN Proteasome subunit alpha type-7 OS=Homo sapiens OX=9606 GN=PSMA7 PE=1 SV=1	2	9	9	9	51.6	27.887	100790	459840	24631	22844	19463	3773.6	10547	9338.8	24835
O14841	OPLAH	sp|O14841|OPLA_HUMAN 5-oxoprolinase OS=Homo sapiens OX=9606 GN=OPLAH PE=1 SV=3	1	9	9	9	11.2	137.46
P19105;O14950;P24844	MYL12A; MYL12B	sp|P19105|ML12A_HUMAN Myosin regulatory light chain 12A OS=Homo sapiens OX=9606 GN=MYL12A PE=1 SV=2;sp|O14950|ML12B_HUMAN Myosin regulatory light chain 12B OS=Homo sapiens OX=9606 GN=MYL12B PE=1 SV=2;sp|P24844|MYL9_HUMAN Myosin regulatory light polypeptide	3	3	3	3	22.8	19.794
O15143	ARPC1B	sp|O15143|ARC1B_HUMAN Actin-related protein 2/3 complex subunit 1B OS=Homo sapiens OX=9606 GN=ARPC1B PE=1 SV=3	1	3	3	3	14.2	40.949
O15144	ARPC2	sp|O15144|ARPC2_HUMAN Actin-related protein 2/3 complex subunit 2 OS=Homo sapiens OX=9606 GN=ARPC2 PE=1 SV=1	1	4	4	4	15	34.333
O15145	ARPC3	sp|O15145|ARPC3_HUMAN Actin-related protein 2/3 complex subunit 3 OS=Homo sapiens OX=9606 GN=ARPC3 PE=1 SV=3	1	3	3	3	17.4	20.546
O15260	SURF4	sp|O15260|SURF4_HUMAN Surfeit locus protein 4 OS=Homo sapiens OX=9606 GN=SURF4 PE=1 SV=3	1	1	1	1	4.8	30.394
O15511	ARPC5	sp|O15511|ARPC5_HUMAN Actin-related protein 2/3 complex subunit 5 OS=Homo sapiens OX=9606 GN=ARPC5 PE=1 SV=3	1	2	2	2	16.6	16.32
O43175	PHGDH	sp|O43175|SERA_HUMAN D-3-phosphoglycerate dehydrogenase OS=Homo sapiens OX=9606 GN=PHGDH PE=1 SV=4	1	12	12	12	31.1	56.65	2025.8	262590			3973.8
O43242	PSMD3	sp|O43242|PSMD3_HUMAN 26S proteasome non-ATPase regulatory subunit 3 OS=Homo sapiens OX=9606 GN=PSMD3 PE=1 SV=2	1	10	10	10	24.7	60.977		61737							1566.1
O43300	LRRTM2	sp|O43300|LRRT2_HUMAN Leucine-rich repeat transmembrane neuronal protein 2 OS=Homo sapiens OX=9606 GN=LRRTM2 PE=1 SV=3	1	1	1	1	2.9	59.076
O43390	HNRNPR	sp|O43390|HNRPR_HUMAN Heterogeneous nuclear ribonucleoprotein R OS=Homo sapiens OX=9606 GN=HNRNPR PE=1 SV=1	1	1	1	1	2.1	70.942
O43488	AKR7A2	sp|O43488|ARK72_HUMAN Aflatoxin B1 aldehyde reductase member 2 OS=Homo sapiens OX=9606 GN=AKR7A2 PE=1 SV=3	1	3	3	2	12.5	39.589
O43707;Q08043;Q9H254	ACTN4	sp|O43707|ACTN4_HUMAN Alpha-actinin-4 OS=Homo sapiens OX=9606 GN=ACTN4 PE=1 SV=2	3	25	25	15	36.6	104.85	1803.4	100940
O43708	GSTZ1	sp|O43708|MAAI_HUMAN Maleylacetoacetate isomerase OS=Homo sapiens OX=9606 GN=GSTZ1 PE=1 SV=3	1	3	3	3	19.9	24.212
O43741	PRKAB2	sp|O43741|AAKB2_HUMAN 5-AMP-activated protein kinase subunit beta-2 OS=Homo sapiens OX=9606 GN=PRKAB2 PE=1 SV=1	1	2	2	2	14.7	30.302
O43866	CD5L	sp|O43866|CD5L_HUMAN CD5 antigen-like OS=Homo sapiens OX=9606 GN=CD5L PE=1 SV=1	1	18	18	18	56.5	38.087	5188100	9574600	8170500	10445000	5840600	6978700	5788700	10249000	14958000	10913000	8312600	15145000	8500200	13928000	8179100	8993700
O60232	ZNRD2	sp|O60232|ZNRD2_HUMAN Protein ZNRD2 OS=Homo sapiens OX=9606 GN=ZNRD2 PE=1 SV=1	1	2	2	2	16.1	21.474
O60256	PRPSAP2	sp|O60256|KPRB_HUMAN Phosphoribosyl pyrophosphate synthase-associated protein 2 OS=Homo sapiens OX=9606 GN=PRPSAP2 PE=1 SV=1	1	2	2	2	7.6	40.925
O60506	SYNCRIP	sp|O60506|HNRPQ_HUMAN Heterogeneous nuclear ribonucleoprotein Q OS=Homo sapiens OX=9606 GN=SYNCRIP PE=1 SV=2	1	1	1	1	2.1	69.602
O60667	FCMR	sp|O60667|FAIM3_HUMAN Fas apoptotic inhibitory molecule 3 OS=Homo sapiens OX=9606 GN=FCMR PE=1 SV=1	1	1	1	1	4.9	43.146
O60701	UGDH	sp|O60701|UGDH_HUMAN UDP-glucose 6-dehydrogenase OS=Homo sapiens OX=9606 GN=UGDH PE=1 SV=1	1	14	14	14	36.2	55.023
Q99880;Q93079;Q99877;P62807;P58876;O60814;Q5QNW6;Q99879;P57053;Q96A08;A0A2R8Y619	H2BC13; H2BC9; H2BC15	sp|Q99880|H2B1L_HUMAN Histone H2B type 1-L OS=Homo sapiens OX=9606 GN=H2BC13 PE=1 SV=3;sp|Q93079|H2B1H_HUMAN Histone H2B type 1-H OS=Homo sapiens OX=9606 GN=H2BC9 PE=1 SV=3;sp|Q99877|H2B1N_HUMAN Histone H2B type 1-N OS=Homo sapiens OX=9606 GN=H2BC15 PE=1 S	11	4	4	1	35.7	13.952	209040	3549500	248560	161780	116620	339770	44932	25899		23259				12226
O75083	WDR1	sp|O75083|WDR1_HUMAN WD repeat-containing protein 1 OS=Homo sapiens OX=9606 GN=WDR1 PE=1 SV=4	1	4	4	4	12.2	66.193
O75367	MACROH2A1	sp|O75367|H2AY_HUMAN Core histone macro-H2A.1 OS=Homo sapiens OX=9606 GN=MACROH2A1 PE=1 SV=4	1	1	1	1	5.4	39.617
O75369;Q14315	FLNB	sp|O75369|FLNB_HUMAN Filamin-B OS=Homo sapiens OX=9606 GN=FLNB PE=1 SV=2	2	22	22	21	11.6	278.16		32986										930.49
O75452;O14756	RDH16	sp|O75452|RDH16_HUMAN Retinol dehydrogenase 16 OS=Homo sapiens OX=9606 GN=RDH16 PE=1 SV=2	2	4	4	4	12.9	35.673
O75460	ERN1	sp|O75460|ERN1_HUMAN Serine/threonine-protein kinase/endoribonuclease IRE1 OS=Homo sapiens OX=9606 GN=ERN1 PE=1 SV=2	1	1	1	1	0.9	109.73												543280		1418300
O75636	FCN3	sp|O75636|FCN3_HUMAN Ficolin-3 OS=Homo sapiens OX=9606 GN=FCN3 PE=1 SV=2	1	13	13	13	57.5	32.903	707840	1410300	625750	2960100	3887900	1670300	1430900	2231800	1420300	1313600	778210	1292800	1145800	1651200	1644900	915580
O75874	IDH1	sp|O75874|IDHC_HUMAN Isocitrate dehydrogenase [NADP] cytoplasmic OS=Homo sapiens OX=9606 GN=IDH1 PE=1 SV=2	1	13	13	12	35	46.659		273060	1541.8	1844.2		689.42	1545.3
O75882	ATRN	sp|O75882|ATRN_HUMAN Attractin OS=Homo sapiens OX=9606 GN=ATRN PE=1 SV=2	1	28	28	28	27	158.54	283270	179430	282000	353970	284040	356560	330200	310800	303530	305330	377530	309320	322420	296340	344770	331420
O75891;Q3SY69	ALDH1L1	sp|O75891|AL1L1_HUMAN Cytosolic 10-formyltetrahydrofolate dehydrogenase OS=Homo sapiens OX=9606 GN=ALDH1L1 PE=1 SV=2	2	25	25	25	37.6	98.828
O94979	SEC31A	sp|O94979|SC31A_HUMAN Protein transport protein Sec31A OS=Homo sapiens OX=9606 GN=SEC31A PE=1 SV=3	1	6	6	6	7	133.01
O95154	AKR7A3	sp|O95154|ARK73_HUMAN Aflatoxin B1 aldehyde reductase member 3 OS=Homo sapiens OX=9606 GN=AKR7A3 PE=1 SV=2	1	9	9	6	37.5	37.206	1982.1	403410									2870.8
O95232	LUC7L3	sp|O95232|LC7L3_HUMAN Luc7-like protein 3 OS=Homo sapiens OX=9606 GN=LUC7L3 PE=1 SV=2	1	1	1	1	3.2	51.466
O95445	APOM	sp|O95445|APOM_HUMAN Apolipoprotein M OS=Homo sapiens OX=9606 GN=APOM PE=1 SV=2	1	9	9	9	62.8	21.253	265670	172930	244180	257990	233170	273010	247200	212730	157470	269480	336890	289510	239050	249350	271940	392970
O95479	H6PD	sp|O95479|G6PE_HUMAN GDH/6PGL endoplasmic bifunctional protein OS=Homo sapiens OX=9606 GN=H6PD PE=1 SV=2	1	3	3	3	5.7	88.892
O95497	VNN1	sp|O95497|VNN1_HUMAN Pantetheinase OS=Homo sapiens OX=9606 GN=VNN1 PE=1 SV=2	1	1	1	1	3.3	57.011
O95954	FTCD	sp|O95954|FTCD_HUMAN Formimidoyltransferase-cyclodeaminase OS=Homo sapiens OX=9606 GN=FTCD PE=1 SV=2	1	21	21	21	50.3	58.926	31230	1769400	5964.9	8352.1	7004.5	6222.9	6937.6	7309.4		7110.4	7428.6	6686.5	7578.9	7326.9	7215.9	6748.3
P00167	CYB5A	sp|P00167|CYB5_HUMAN Cytochrome b5 OS=Homo sapiens OX=9606 GN=CYB5A PE=1 SV=2	1	5	5	5	49.3	15.33
P00325	ADH1B	sp|P00325|ADH1B_HUMAN All-trans-retinol dehydrogenase [NAD(+)] ADH1B OS=Homo sapiens OX=9606 GN=ADH1B PE=1 SV=2	1	22	21	7	69.9	39.854		6510700	18025	176800		9947	20014									3411.8
P00326	ADH1C	sp|P00326|ADH1G_HUMAN Alcohol dehydrogenase 1C OS=Homo sapiens OX=9606 GN=ADH1C PE=1 SV=2	1	16	5	5	48.3	39.867
P00338;P07864;Q6ZMR3	LDHA	sp|P00338|LDHA_HUMAN L-lactate dehydrogenase A chain OS=Homo sapiens OX=9606 GN=LDHA PE=1 SV=2	3	11	11	10	30.7	36.688	87988	699160	65656	56671	44015	31318	33044	22822	27651	17100	4865.5	6111.3		6641.4	6663.3	8836.2
P00352	ALDH1A1	sp|P00352|AL1A1_HUMAN Retinal dehydrogenase 1 OS=Homo sapiens OX=9606 GN=ALDH1A1 PE=1 SV=2	1	22	22	22	57.1	54.861		840750	10781	21145	2535.6	2399.3	43505
P00367;P49448	GLUD1; GLUD2	sp|P00367|DHE3_HUMAN Glutamate dehydrogenase 1, mitochondrial OS=Homo sapiens OX=9606 GN=GLUD1 PE=1 SV=2;sp|P49448|DHE4_HUMAN Glutamate dehydrogenase 2, mitochondrial OS=Homo sapiens OX=9606 GN=GLUD2 PE=1 SV=2	2	15	15	15	36.2	61.397		254980									18509
P00390	GSR	sp|P00390|GSHR_HUMAN Glutathione reductase, mitochondrial OS=Homo sapiens OX=9606 GN=GSR PE=1 SV=2	1	3	3	3	7.3	56.256
P00441	SOD1	sp|P00441|SODC_HUMAN Superoxide dismutase [Cu-Zn] OS=Homo sapiens OX=9606 GN=SOD1 PE=1 SV=2	1	3	3	3	44.8	15.936
P00450;CON__ENSEMBL:ENSBTAP00000031900	CP	sp|P00450|CERU_HUMAN Ceruloplasmin OS=Homo sapiens OX=9606 GN=CP PE=1 SV=1	2	47	47	47	53.6	122.2	5163200	3924100	5856700	6393100	6898400	4552200	6443100	7966100	7227100	5719600	6219600	6668700	4479900	6057300	4812600	5161600
P00451	F8	sp|P00451|FA8_HUMAN Coagulation factor VIII OS=Homo sapiens OX=9606 GN=F8 PE=1 SV=1	1	15	15	15	8.5	267.01	39284		91919		51231	7627.6	3421		2774.8	2147.5
P00480	OTC	sp|P00480|OTC_HUMAN Ornithine transcarbamylase, mitochondrial OS=Homo sapiens OX=9606 GN=OTC PE=1 SV=3	1	3	3	3	10.5	39.935
P00488	F13A1	sp|P00488|F13A_HUMAN Coagulation factor XIII A chain OS=Homo sapiens OX=9606 GN=F13A1 PE=1 SV=4	1	24	24	24	36.1	83.266	303910	757980	860860	438950	548500	342130	424830	503900	410230	382670	221330	273300	323040	337880	436400	413030
P00505	GOT2	sp|P00505|AATM_HUMAN Aspartate aminotransferase, mitochondrial OS=Homo sapiens OX=9606 GN=GOT2 PE=1 SV=3	1	6	6	6	16.5	47.517
P00558;P07205	PGK1	sp|P00558|PGK1_HUMAN Phosphoglycerate kinase 1 OS=Homo sapiens OX=9606 GN=PGK1 PE=1 SV=3	2	12	12	12	43.4	44.614	6103.2	156560			2940.1	2619.8					1745.8
P00734;CON__P00735	F2	sp|P00734|THRB_HUMAN Prothrombin OS=Homo sapiens OX=9606 GN=F2 PE=1 SV=2	2	34	34	34	57.4	70.036	2230000	1592600	2110000	2721100	2818800	2858800	2624400	2866700	2193800	2633300	4210400	3064400	2937000	2669700	3052900	3334400
P00736	C1R	sp|P00736|C1R_HUMAN Complement C1r subcomponent OS=Homo sapiens OX=9606 GN=C1R PE=1 SV=2	1	32	32	31	57.9	80.118	4538100	2282400	2707800	2023500	1801900	2133600	3792500	3660600	2802000	3939600	2861000	2805400	3097000	3533300	3893900	2054300
P00738	HP	sp|P00738|HPT_HUMAN Haptoglobin OS=Homo sapiens OX=9606 GN=HP PE=1 SV=1	1	29	29	13	56.9	45.205	37302000	14236000	41083000	22025000	22464000	28550000	26501000	58919000	5653700	46654000	35052000	60022000	38995000	81297000	45137000	38632000
P00739	HPR	sp|P00739|HPTR_HUMAN Haptoglobin-related protein OS=Homo sapiens OX=9606 GN=HPR PE=2 SV=2	1	24	8	8	64.1	39.029	1959900	1525800	1467100	3438300	2130300	2302800	1567400	1525200	1717100	2751200	2164700	4364500	1860800	4599800	2121700	2086600
P00740	F9	sp|P00740|FA9_HUMAN Coagulation factor IX OS=Homo sapiens OX=9606 GN=F9 PE=1 SV=2	1	12	12	12	29.9	51.778	130760	140930	120230	82251	115890	204440	87753	109590	103020	126800	170230	107330	92048	110680	91737	112620
P00742	F10	sp|P00742|FA10_HUMAN Coagulation factor X OS=Homo sapiens OX=9606 GN=F10 PE=1 SV=2	1	10	10	10	26.2	54.731	125540	109460	87262	129010	131030	154840	114910	92633	72946	120950	216070	122920	121850	109090	133380	138760
P00746	CFD	sp|P00746|CFAD_HUMAN Complement factor D OS=Homo sapiens OX=9606 GN=CFD PE=1 SV=5	1	8	8	8	43.9	27.033	15365	168760	47202	19596	36707	121080	38244	41787	25497	31234	40425	59771	36964	20541	56473	33445
P00747;CON__P06868;Q02325;Q15195	PLG	sp|P00747|PLMN_HUMAN Plasminogen OS=Homo sapiens OX=9606 GN=PLG PE=1 SV=2	4	53	53	51	71.9	90.568	3593200	1722400	2297800	2462000	3025500	3119400	3170600	3614300	3159500	3323500	3666200	3476900	3415800	3583800	3593500	3513100
P00748	F12	sp|P00748|FA12_HUMAN Coagulation factor XII OS=Homo sapiens OX=9606 GN=F12 PE=1 SV=3	1	17	17	17	39	67.791	111300	147750	267800	225990	211680	442050	237610	233450	174730	205050	590230	262150	452890	280890	448540	779100
P00751	CFB	sp|P00751|CFAB_HUMAN Complement factor B OS=Homo sapiens OX=9606 GN=CFB PE=1 SV=2	1	37	37	36	53.4	85.532	4905200	1430600	3166100	2560500	2431700	3204400	2511500	3324900	3448900	3190000	3292600	3850700	2974600	3468000	2296300	2666200
P00915	CA1	sp|P00915|CAH1_HUMAN Carbonic anhydrase 1 OS=Homo sapiens OX=9606 GN=CA1 PE=1 SV=2	1	6	6	6	37.2	28.87	28933	35688	41726	43484	203430	24136	13979	11133	18681	27709	41565	55326	35515	24945	31125	26370
P00918	CA2	sp|P00918|CAH2_HUMAN Carbonic anhydrase 2 OS=Homo sapiens OX=9606 GN=CA2 PE=1 SV=2	1	3	3	3	18.1	29.246
P00966	ASS1	sp|P00966|ASSY_HUMAN Argininosuccinate synthase OS=Homo sapiens OX=9606 GN=ASS1 PE=1 SV=2	1	18	18	18	57	46.53	31095	1708900	6583.4	35252
P01008;CON__P41361	SERPINC1	sp|P01008|ANT3_HUMAN Antithrombin-III OS=Homo sapiens OX=9606 GN=SERPINC1 PE=1 SV=1	2	26	26	26	56.7	52.602	2526900	1774700	2082100	3255000	3891800	3290300	3054900	3182400	2610200	3507100	4425800	3271000	3524900	3242400	2789700	3235000
P01009	SERPINA1	sp|P01009|A1AT_HUMAN Alpha-1-antitrypsin OS=Homo sapiens OX=9606 GN=SERPINA1 PE=1 SV=3	1	34	34	34	68.2	46.736	29585000	13270000	23001000	25175000	23829000	22129000	24324000	23619000	21716000	24938000	29653000	23574000	18927000	19558000	15796000	18663000
P01011	SERPINA3	sp|P01011|AACT_HUMAN Alpha-1-antichymotrypsin OS=Homo sapiens OX=9606 GN=SERPINA3 PE=1 SV=2	1	18	18	18	47.3	47.65	8172200	4003000	6842100	6183000	6691300	5872700	5703100	5946300	5044500	4622000	6385000	6644100	3954600	3813600	3016700	5078800
P01019	AGT	sp|P01019|ANGT_HUMAN Angiotensinogen OS=Homo sapiens OX=9606 GN=AGT PE=1 SV=1	1	14	14	14	39.8	53.154	1349300	747340	1195300	1180600	1142600	1612300	1059500	828390	885740	1049600	1033000	1100300	956140	1057600	886470	995240
P01023	A2M	sp|P01023|A2MG_HUMAN Alpha-2-macroglobulin OS=Homo sapiens OX=9606 GN=A2M PE=1 SV=3	1	89	89	75	72.5	163.29	39994000	47441000	50076000	60248000	56681000	42873000	66248000	52605000	63559000	81453000	51144000	80410000	78438000	49749000	60395000	57308000
P01024	C3	sp|P01024|CO3_HUMAN Complement C3 OS=Homo sapiens OX=9606 GN=C3 PE=1 SV=2	1	117	117	107	77.3	187.15	22626000	12539000	18085000	18450000	19947000	23155000	25801000	25522000	25084000	23707000	25716000	21972000	25820000	25146000	26311000	23534000
P01031;CON__Q1A7A4	C5	sp|P01031|CO5_HUMAN Complement C5 OS=Homo sapiens OX=9606 GN=C5 PE=1 SV=4	2	68	68	68	48.4	188.3	2031500	1082000	1196200	1182800	1406100	1464500	1424500	2201300	1564300	1470100	1319900	1178500	1241100	1253500	1181900	1267700
P01033	TIMP1	sp|P01033|TIMP1_HUMAN Metalloproteinase inhibitor 1 OS=Homo sapiens OX=9606 GN=TIMP1 PE=1 SV=1	1	4	4	4	28	23.171		74096	24547
P01034	CST3	sp|P01034|CYTC_HUMAN Cystatin-C OS=Homo sapiens OX=9606 GN=CST3 PE=1 SV=1	1	2	2	2	22.6	15.799
P01042;CON__P01045-1;CON__Q2KJ62;CON__P01044-1	KNG1	sp|P01042|KNG1_HUMAN Kininogen-1 OS=Homo sapiens OX=9606 GN=KNG1 PE=1 SV=2	4	28	28	28	42.9	71.957	3148100	1636200	1995100	2416100	2583400	2644600	2454500	2348200	2194600	2864100	3488200	2752800	2333000	2474400	2338200	2608400
P01344	IGF2	sp|P01344|IGF2_HUMAN Insulin-like growth factor II OS=Homo sapiens OX=9606 GN=IGF2 PE=1 SV=1	1	2	2	2	13.9	20.14	133240		75204	133570	37910	136130	112690	66718		128910	294850			179230	81128	71481
P01591	JCHAIN	sp|P01591|IGJ_HUMAN Immunoglobulin J chain OS=Homo sapiens OX=9606 GN=JCHAIN PE=1 SV=4	1	8	8	8	64.2	18.098	3774700	5219100	4466600	6035600	3671600	3726200	3380900	5257700	7809100	6013400	4751600	6943800	4499500	6723000	4301100	4749300
P01594;P01593	IGKV1-33; IGKV1D-33	sp|P01594|KV133_HUMAN Immunoglobulin kappa variable 1-33 OS=Homo sapiens OX=9606 GN=IGKV1-33 PE=1 SV=2;sp|P01593|KVD33_HUMAN Immunoglobulin kappa variable 1D-33 OS=Homo sapiens OX=9606 GN=IGKV1D-33 PE=1 SV=2	2	3	3	3	34.2	12.848				769460	1905400		3452900	2849900	2097200	2089900	351180	2132200	3038500	1764100	1266200	1362400
P04432;P01597	IGKV1D-39; IGKV1-39	sp|P04432|KVD39_HUMAN Immunoglobulin kappa variable 1D-39 OS=Homo sapiens OX=9606 GN=IGKV1D-39 PE=3 SV=2;sp|P01597|KV139_HUMAN Immunoglobulin kappa variable 1-39 OS=Homo sapiens OX=9606 GN=IGKV1-39 PE=1 SV=2	2	3	2	2	29.1	12.737	153550	236230	341600	145450	388670	170710	296790	244130	366470	323570	214570	540140	225940	282570	253650	174760
P01599	IGKV1-17	sp|P01599|KV117_HUMAN Immunoglobulin kappa variable 1-17 OS=Homo sapiens OX=9606 GN=IGKV1-17 PE=1 SV=2	1	6	6	2	29.1	12.778	634530	846160	1129600	1619500	933390	836620	411940	1141500	790080	454550	529800	1052100	1688200	974190	1039600	646370
P01601	IGKV1D-16	sp|P01601|KVD16_HUMAN Immunoglobulin kappa variable 1D-16 OS=Homo sapiens OX=9606 GN=IGKV1D-16 PE=3 SV=2	1	2	1	1	26.5	12.73
P01602	IGKV1-5	sp|P01602|KV105_HUMAN Immunoglobulin kappa variable 1-5 OS=Homo sapiens OX=9606 GN=IGKV1-5 PE=1 SV=2	1	3	2	2	24.8	12.781	69265	140900	124050		28132	86882		89132	233590	99600			98230	66333		68599
P01619	IGKV3-20	sp|P01619|KV320_HUMAN Immunoglobulin kappa variable 3-20 OS=Homo sapiens OX=9606 GN=IGKV3-20 PE=1 SV=2	1	5	5	4	46.6	12.557	3715500	3290100	4835200	4763500	4327300	3662000	3687000	3675600	5726500	6195000	5566600	6803300	4558300	4714300	3782500	6001000
P01624;A0A0C4DH55	IGKV3-15; IGKV3D-7	sp|P01624|KV315_HUMAN Immunoglobulin kappa variable 3-15 OS=Homo sapiens OX=9606 GN=IGKV3-15 PE=1 SV=2;sp|A0A0C4DH55|KVD07_HUMAN Immunoglobulin kappa variable 3D-7 OS=Homo sapiens OX=9606 GN=IGKV3D-7 PE=3 SV=5	2	4	4	1	32.2	12.496	1319700	914750	1075100	590840	683480	981680	586770	208730	908440	1818000	1214400	459540	1327100	358850	1073300	487390
P01699	IGLV1-44	sp|P01699|LV144_HUMAN Immunoglobulin lambda variable 1-44 OS=Homo sapiens OX=9606 GN=IGLV1-44 PE=1 SV=2	1	3	1	1	38.5	12.201
P01700	IGLV1-47	sp|P01700|LV147_HUMAN Immunoglobulin lambda variable 1-47 OS=Homo sapiens OX=9606 GN=IGLV1-47 PE=1 SV=2	1	3	3	1	24.8	12.283	388450	676990	588950	744690	551420	589240	506240	1080300	728860	714660	777680	812130	700180	605100	460420	594970
P01701	IGLV1-51	sp|P01701|LV151_HUMAN Immunoglobulin lambda variable 1-51 OS=Homo sapiens OX=9606 GN=IGLV1-51 PE=1 SV=2	1	4	4	4	38.5	12.249	3590700	3948000	4379000	2953700	3691200	2838800	4343000	3636400	7684200	4933300	3812300	4485300	3446100	5705600	3350100	4595200
P01703;A0A075B6I6	IGLV1-40; IGLV1-50	sp|P01703|LV140_HUMAN Immunoglobulin lambda variable 1-40 OS=Homo sapiens OX=9606 GN=IGLV1-40 PE=1 SV=2;sp|A0A075B6I6|LV150_HUMAN Probable non-functional immunoglobulin lambda variable 1-50 OS=Homo sapiens OX=9606 GN=IGLV1-50 PE=1 SV=1	2	2	2	2	33.1	12.301	297180	286540	454600	300430	386050	367870	801560	392250	425750	329080	444920	426900	1258800	499310	318960	407010
P01704	IGLV2-14	sp|P01704|LV214_HUMAN Immunoglobulin lambda variable 2-14 OS=Homo sapiens OX=9606 GN=IGLV2-14 PE=1 SV=2	1	2	1	1	13.3	12.597
P01706	IGLV2-11	sp|P01706|LV211_HUMAN Immunoglobulin lambda variable 2-11 OS=Homo sapiens OX=9606 GN=IGLV2-11 PE=1 SV=2	1	3	2	2	43.7	12.644	110800	332110	469580	197080	385380	211790	218380	397520	444940	802540	232530	261880	534070	676330	229930	267760
P01714	IGLV3-19	sp|P01714|LV319_HUMAN Immunoglobulin lambda variable 3-19 OS=Homo sapiens OX=9606 GN=IGLV3-19 PE=1 SV=2	1	5	5	5	63.4	12.042	1609400	1694600	1379900	1588400	2362000	1199700	1502800	2055300	4409100	1512200	1215200	1239000	1392900	1667600	1420300	1379300
P01715	IGLV3-1	sp|P01715|LV301_HUMAN Immunoglobulin lambda variable 3-1 OS=Homo sapiens OX=9606 GN=IGLV3-1 PE=1 SV=2	1	4	3	3	26.1	12.296	132830	203050	160310	137290	297260	145490	294820	210460	178620	269560	120040	201430	322120	242760	143600	159770
P01717	IGLV3-25	sp|P01717|LV325_HUMAN Immunoglobulin lambda variable 3-25 OS=Homo sapiens OX=9606 GN=IGLV3-25 PE=1 SV=2	1	5	5	2	36.6	12.011	769270	1022600	1084300	902980	1261600	940500	909960	805670	987960	1006500	556720	995210	1104900	1140000	571650	718760
P01718	IGLV3-27	sp|P01718|LV327_HUMAN Immunoglobulin lambda variable 3-27 OS=Homo sapiens OX=9606 GN=IGLV3-27 PE=1 SV=2	1	4	2	2	32.7	12.165	61424	66565	51346	128010	71661	54055	77820	80538	88131	134060		138850	44323	165970		60405
P01721	IGLV6-57	sp|P01721|LV657_HUMAN Immunoglobulin lambda variable 6-57 OS=Homo sapiens OX=9606 GN=IGLV6-57 PE=1 SV=2	1	4	4	4	56.4	12.566	407810	761930	892220	1436600	1075200	778670	945820	783050	592400	1295700	535950	890710	1138000	970540	338910	476650
P01742	IGHV1-69	sp|P01742|HV169_HUMAN Immunoglobulin heavy variable 1-69 OS=Homo sapiens OX=9606 GN=IGHV1-69 PE=1 SV=2	1	3	1	1	33.3	12.659
P01743	IGHV1-46	sp|P01743|HV146_HUMAN Immunoglobulin heavy variable 1-46 OS=Homo sapiens OX=9606 GN=IGHV1-46 PE=1 SV=2	1	3	2	2	35	12.933
P01762	IGHV3-11	sp|P01762|HV311_HUMAN Immunoglobulin heavy variable 3-11 OS=Homo sapiens OX=9606 GN=IGHV3-11 PE=1 SV=2	1	3	1	1	35	12.909
P01763	IGHV3-48	sp|P01763|HV348_HUMAN Immunoglobulin heavy variable 3-48 OS=Homo sapiens OX=9606 GN=IGHV3-48 PE=1 SV=2	1	4	2	2	53.8	12.812
P01764	IGHV3-23	sp|P01764|HV323_HUMAN Immunoglobulin heavy variable 3-23 OS=Homo sapiens OX=9606 GN=IGHV3-23 PE=1 SV=2	1	4	2	2	53.8	12.582							869330			485790		1197800				429150
P01766	IGHV3-13	sp|P01766|HV313_HUMAN Immunoglobulin heavy variable 3-13 OS=Homo sapiens OX=9606 GN=IGHV3-13 PE=1 SV=2	1	3	2	2	35.3	12.506	174310	297260	280560	712910	620320	285290	210950	509700	774660	880430	410810	474540	374150	468940	334190	503660
P01767;A0A0C4DH42	IGHV3-53; IGHV3-66	sp|P01767|HV353_HUMAN Immunoglobulin heavy variable 3-53 OS=Homo sapiens OX=9606 GN=IGHV3-53 PE=1 SV=2;sp|A0A0C4DH42|HV366_HUMAN Immunoglobulin heavy variable 3-66 OS=Homo sapiens OX=9606 GN=IGHV3-66 PE=3 SV=1	2	4	2	2	53.4	12.769		56939	52457	86804		23273	86087		160530	166160	51749	210560	98057	116560	145940	156670
P0DP03;P01768	IGHV3-30-5; IGHV3-30	sp|P0DP03|HVC05_HUMAN Immunoglobulin heavy variable 3-30-5 OS=Homo sapiens OX=9606 GN=IGHV3-30-5 PE=3 SV=1;sp|P01768|HV330_HUMAN Immunoglobulin heavy variable 3-30 OS=Homo sapiens OX=9606 GN=IGHV3-30 PE=1 SV=2	2	5	1	0	53.8	12.947
P01772	IGHV3-33	sp|P01772|HV333_HUMAN Immunoglobulin heavy variable 3-33 OS=Homo sapiens OX=9606 GN=IGHV3-33 PE=1 SV=2	1	5	2	1	53.8	13.074		49591	38082	45271	19298		41591	84091	269350	44285	23383	53052	19862	38289	29778	29012
P01780	IGHV3-7	sp|P01780|HV307_HUMAN Immunoglobulin heavy variable 3-7 OS=Homo sapiens OX=9606 GN=IGHV3-7 PE=1 SV=2	1	4	2	2	32.5	12.943	1230400	1129900	1955500	2177400	1417400	1732500	1270800	165170	2157700	2834300	1394500	1305500	1503800	2840900	1856200	2057800
P01782;P0DP04	IGHV3-9; IGHV3-43D	sp|P01782|HV309_HUMAN Immunoglobulin heavy variable 3-9 OS=Homo sapiens OX=9606 GN=IGHV3-9 PE=1 SV=2;sp|P0DP04|HV43D_HUMAN Immunoglobulin heavy variable 3-43D OS=Homo sapiens OX=9606 GN=IGHV3-43D PE=3 SV=1	2	5	5	4	54.2	12.945	1214500	1226100	1514900	1703900	1854200	750960	1292600	2387000	2096200	2276000	1256900	2234100	1860400	2203300	1816000	1992800
P01817	IGHV2-5	sp|P01817|HV205_HUMAN Immunoglobulin heavy variable 2-5 OS=Homo sapiens OX=9606 GN=IGHV2-5 PE=1 SV=2	1	2	2	2	31.9	13.231		177480	74286	413290	200360			340290	1068200	1098100	221590	668970	367530	523040	420460	575790
P01833	PIGR	sp|P01833|PIGR_HUMAN Polymeric immunoglobulin receptor OS=Homo sapiens OX=9606 GN=PIGR PE=1 SV=4	1	17	17	17	28	83.283	565630	255920	138240	173790	110090	295960	192740	187060	202140	127020	139360	152290	134890	318890	255310	125890
P01834	IGKC	sp|P01834|IGKC_HUMAN Immunoglobulin kappa constant OS=Homo sapiens OX=9606 GN=IGKC PE=1 SV=2	1	9	2	2	86.9	11.765	123010000	71569000	129020000	150490000	28562000	15092000	111710000	84241000	118330000	79122000	58937000	127520000	8811900	61465000	102790000	96223000
P01854;P0DOX4	IGHE	sp|P01854|IGHE_HUMAN Immunoglobulin heavy constant epsilon OS=Homo sapiens OX=9606 GN=IGHE PE=1 SV=1;sp|P0DOX4|IGE_HUMAN Immunoglobulin epsilon heavy chain OS=Homo sapiens OX=9606 PE=1 SV=1	2	6	6	6	16.1	47.019					14446	64875							29368
P01859	IGHG2	sp|P01859|IGHG2_HUMAN Immunoglobulin heavy constant gamma 2 OS=Homo sapiens OX=9606 GN=IGHG2 PE=1 SV=2	1	18	11	9	63.2	35.9	23187000	26337000	26040000	43088000	48602000	34921000	31698000	29692000	46044000	39704000	29281000	36388000	32498000	31567000	37241000	71741000
P01860	IGHG3	sp|P01860|IGHG3_HUMAN Immunoglobulin heavy constant gamma 3 OS=Homo sapiens OX=9606 GN=IGHG3 PE=1 SV=2	1	18	11	8	55.7	41.287	43110000	36013000	28619000	54554000	11952000	61692000	53649000	12020000	31147000	32955000	30475000	14754000	32974000	31920000	20405000	24631000
P01861	IGHG4	sp|P01861|IGHG4_HUMAN Immunoglobulin heavy constant gamma 4 OS=Homo sapiens OX=9606 GN=IGHG4 PE=1 SV=1	1	14	7	7	54.4	35.94	6059000	6572600	1330600	3966600	17199000	18006000	12722000	2939000	3066000	8229800	9309300	3490600	3701700	17469000	7761100	12954000
P01871	IGHM	sp|P01871|IGHM_HUMAN Immunoglobulin heavy constant mu OS=Homo sapiens OX=9606 GN=IGHM PE=1 SV=4	1	24	24	6	62.9	49.439	26507000	42290000	34508000	47190000	24486000	31487000	27578000	42957000	58755000	44521000	33358000	57892000	37163000	55917000	33559000	39297000
P01876	IGHA1	sp|P01876|IGHA1_HUMAN Immunoglobulin heavy constant alpha 1 OS=Homo sapiens OX=9606 GN=IGHA1 PE=1 SV=2	1	17	12	11	60.6	37.654	16045000	12156000	14614000	16798000	19858000	13440000	18163000	12138000	24420000	22609000	22420000	19349000	18157000	19954000	10886000	18955000
P01877	IGHA2	sp|P01877|IGHA2_HUMAN Immunoglobulin heavy constant alpha 2 OS=Homo sapiens OX=9606 GN=IGHA2 PE=1 SV=4	1	15	1	1	63.5	36.591	236510								270540
P02042	HBD	sp|P02042|HBD_HUMAN Hemoglobin subunit delta OS=Homo sapiens OX=9606 GN=HBD PE=1 SV=2	1	13	6	6	92.5	16.055	265460	174760	433780	347490	1228600	158970	419380	424800	290030	394040	270230	906220	636960	553800	493480	399400
P02144	MB	sp|P02144|MYG_HUMAN Myoglobin OS=Homo sapiens OX=9606 GN=MB PE=1 SV=2	1	6	6	6	50.6	17.184		192680		37448	416570	59441
P02452	COL1A1	sp|P02452|CO1A1_HUMAN Collagen alpha-1(I) chain OS=Homo sapiens OX=9606 GN=COL1A1 PE=1 SV=5	1	4	4	4	3.3	138.94		127190		25040
P02458	COL2A1	sp|P02458|CO2A1_HUMAN Collagen alpha-1(II) chain OS=Homo sapiens OX=9606 GN=COL2A1 PE=1 SV=3	1	3	3	3	2.1	141.78
P02647;CON__P15497	APOA1	sp|P02647|APOA1_HUMAN Apolipoprotein A-I OS=Homo sapiens OX=9606 GN=APOA1 PE=1 SV=1	2	31	31	31	79.8	30.777	13322000	15729000	20398000	25301000	25193000	23251000	20258000	23470000	16236000	27815000	33147000	31033000	25515000	23074000	22721000	23185000
P02649;CON__Q03247	APOE	sp|P02649|APOE_HUMAN Apolipoprotein E OS=Homo sapiens OX=9606 GN=APOE PE=1 SV=1	2	20	20	20	67.8	36.154	1216100	715790	1048200	694760	730010	836530	757670	362540	631800	479960	810150	618880	1067000	800740	734510	850400
P02652	APOA2	sp|P02652|APOA2_HUMAN Apolipoprotein A-II OS=Homo sapiens OX=9606 GN=APOA2 PE=1 SV=1	1	5	5	5	41	11.175	9019500	8289600	9264300	12677000	9834900	12252000	10463000	10442000	9135300	13905000	16624000	14614000	10890000	13022000	11259000	13555000
P02654	APOC1	sp|P02654|APOC1_HUMAN Apolipoprotein C-I OS=Homo sapiens OX=9606 GN=APOC1 PE=1 SV=1	1	5	5	5	28.9	9.3318	451860	449220	591070	828190	511050	546360	688320	434820	546290	850690	1029800	845360	1045800	709010	999700	1107000
P02655	APOC2	sp|P02655|APOC2_HUMAN Apolipoprotein C-II OS=Homo sapiens OX=9606 GN=APOC2 PE=1 SV=1	1	4	4	4	49.5	11.284	919990	500840	453580	852020	541000	960110	1307200	281070	1242300	1418100	1207000	1407500	1219000	995270	1661300	1960400
P02656	APOC3	sp|P02656|APOC3_HUMAN Apolipoprotein C-III OS=Homo sapiens OX=9606 GN=APOC3 PE=1 SV=1	1	5	5	5	55.6	10.852	1634200	1096000	924510	1338000	1506800	2910700	1830200	978040	1745100	3452200	2766800	2359800	2773300	1701900	3940600	4701700
P02671;CON__P02672	FGA	sp|P02671|FIBA_HUMAN Fibrinogen alpha chain OS=Homo sapiens OX=9606 GN=FGA PE=1 SV=2	2	48	48	48	59.7	94.972	37652000	31293000	47522000	27008000	26716000	28715000	31536000	37713000	24983000	30740000	25537000	25459000	24157000	24663000	27265000	22020000
P02675	FGB	sp|P02675|FIBB_HUMAN Fibrinogen beta chain OS=Homo sapiens OX=9606 GN=FGB PE=1 SV=2	1	43	43	37	73.3	55.928	41972000	44855000	45808000	30149000	26990000	27643000	30505000	38487000	26618000	27704000	24512000	25397000	25438000	24714000	25635000	23318000
P02679	FGG	sp|P02679|FIBG_HUMAN Fibrinogen gamma chain OS=Homo sapiens OX=9606 GN=FGG PE=1 SV=3	1	34	34	34	74	51.511	35019000	37130000	37886000	25951000	23806000	24063000	26251000	31875000	22323000	23977000	21083000	21330000	20628000	20427000	21328000	19864000
P02741	CRP	sp|P02741|CRP_HUMAN C-reactive protein OS=Homo sapiens OX=9606 GN=CRP PE=1 SV=1	1	7	7	7	24.1	25.038	1385300	98092	1783400	143880	15372	150700	67720	48903	289310	50531	24333	7834.4	3659.5	4122
P02743	APCS	sp|P02743|SAMP_HUMAN Serum amyloid P-component OS=Homo sapiens OX=9606 GN=APCS PE=1 SV=2	1	7	7	7	33.2	25.387	3511900	1820600	2284900	2450500	1865300	3650900	2630600	2932300	3054500	2704700	3314500	2824600	2740400	3504300	2843400	3747000
P02745	C1QA	sp|P02745|C1QA_HUMAN Complement C1q subcomponent subunit A OS=Homo sapiens OX=9606 GN=C1QA PE=1 SV=2	1	6	6	6	36.3	26.016	2576900	4111400	2117800	4315300	2585800	2044600	5044500	3634700	5598700	4676600	2595100	3796900	3198800	4311900	3784400	3478400
P02746	C1QB	sp|P02746|C1QB_HUMAN Complement C1q subcomponent subunit B OS=Homo sapiens OX=9606 GN=C1QB PE=1 SV=3	1	7	7	7	32.4	26.721	4079800	5349000	3713800	4958400	3545000	3043300	3847900	3667200	5080200	4298800	3032900	2970500	3954100	3748900	3558800	3107300
P02747	C1QC	sp|P02747|C1QC_HUMAN Complement C1q subcomponent subunit C OS=Homo sapiens OX=9606 GN=C1QC PE=1 SV=3	1	6	6	5	36.3	25.773	8371600	9769700	7650800	9570900	7316700	6305900	7402100	7535100	8812200	8020800	6604800	5713700	7572500	7277400	6690900	5666000
P02748;CON__Q3MHN2;REV__Q4AC99	C9	sp|P02748|CO9_HUMAN Complement component C9 OS=Homo sapiens OX=9606 GN=C9 PE=1 SV=2	3	21	21	20	44.7	63.173	2584500	981550	1633300	940950	1178200	1473500	1232000	1750800	1310400	1468000	1355300	1239000	931870	943800	618220	787480
P02749;CON__P17690	APOH	sp|P02749|APOH_HUMAN Beta-2-glycoprotein 1 OS=Homo sapiens OX=9606 GN=APOH PE=1 SV=3	2	19	19	19	56.8	38.298	4630800	1886800	2840100	3778900	4200600	4794600	3251500	3254000	3333900	3843300	6857300	4645600	3770100	3741500	4675300	4014500
P02750	LRG1	sp|P02750|A2GL_HUMAN Leucine-rich alpha-2-glycoprotein OS=Homo sapiens OX=9606 GN=LRG1 PE=1 SV=2	1	9	9	9	35.2	38.177	1136700	323960	816550	588850	540190	387990	464030	547520	424960	528070	445970	503200	237850	220230	230180	202300
P02751	FN1	sp|P02751|FINC_HUMAN Fibronectin OS=Homo sapiens OX=9606 GN=FN1 PE=1 SV=5	1	90	90	90	51.4	272.32	10570000	17988000	15616000	13759000	9473400	9731300	10138000	7600800	10896000	8233900	4595700	6492000	9182900	9134100	9808200	8943100
P02753	RBP4	sp|P02753|RET4_HUMAN Retinol-binding protein 4 OS=Homo sapiens OX=9606 GN=RBP4 PE=1 SV=3	1	9	9	9	57.2	23.01	1299400	472290	339490	622500	915570	1817000	752250	823260	392800	202990	951720	927240	819480	773270	1257000	784030
P02760;CON__P00978	AMBP	sp|P02760|AMBP_HUMAN Protein AMBP OS=Homo sapiens OX=9606 GN=AMBP PE=1 SV=1	2	14	14	14	49.4	38.999	2238700	1875500	2004100	2317700	2260400	3755800	3085100	3035100	2488100	2852400	3065300	2575300	2890700	2674800	2846200	2829500
P02763	ORM1	sp|P02763|A1AG1_HUMAN Alpha-1-acid glycoprotein 1 OS=Homo sapiens OX=9606 GN=ORM1 PE=1 SV=1	1	10	10	6	52.7	23.511	11468000	5675600	13579000	10829000	13477000	9360300	10048000	11251000	9586700	10351000	12826000	14460000	6439200	8229000	7178500	9489000
P02765;CON__P12763	AHSG	sp|P02765|FETUA_HUMAN Alpha-2-HS-glycoprotein OS=Homo sapiens OX=9606 GN=AHSG PE=1 SV=2	2	9	9	9	31.6	39.34	3797600	3421100	3338400	3311500	4511000	3299400	3650900	3903200	3761200	3969800	7816300	4056200	4089100	4683500	4068000	4309600
P02766	TTR	sp|P02766|TTHY_HUMAN Transthyretin OS=Homo sapiens OX=9606 GN=TTR PE=1 SV=1	1	9	9	9	69.4	15.887	4694100	4098900	2670500	7713400	8073500	9353700	8891100	8509400	5092600	6765200	10362000	10073000	9240600	9267100	11159000	9468700
P02774;CON__Q3MHN5;CON__ENSEMBL:ENSBTAP00000018229	GC	sp|P02774|VTDB_HUMAN Vitamin D-binding protein OS=Homo sapiens OX=9606 GN=GC PE=1 SV=2	3	28	28	28	63.3	52.917	4023300	2980200	3364900	4215500	3887600	4068700	3720000	3929200	3960200	4100900	6206800	3959900	3941600	4270500	4242700	4327600
P02775	PPBP	sp|P02775|CXCL7_HUMAN Platelet basic protein OS=Homo sapiens OX=9606 GN=PPBP PE=1 SV=3	1	2	2	2	22.7	13.894	43273			17376	30984		29128	42055								12228
P02776;P10720	PF4; PF4V1	sp|P02776|PLF4_HUMAN Platelet factor 4 OS=Homo sapiens OX=9606 GN=PF4 PE=1 SV=2;sp|P10720|PF4V_HUMAN Platelet factor 4 variant OS=Homo sapiens OX=9606 GN=PF4V1 PE=1 SV=1	2	3	3	3	34.7	10.845	89533	51335		33834	46678		43177	91279				10435		68735	28529
P02786	TFRC	sp|P02786|TFR1_HUMAN Transferrin receptor protein 1 OS=Homo sapiens OX=9606 GN=TFRC PE=1 SV=2	1	20	20	20	32.4	84.87	114630	118440	156840	193320	221480	120470	178660	173190	97544	95152	140950	129240	105860	93933	92302	103030
P02787;CON__Q2HJF0	TF	sp|P02787|TRFE_HUMAN Serotransferrin OS=Homo sapiens OX=9606 GN=TF PE=1 SV=3	2	59	59	58	73.9	77.063	14218000	13033000	18008000	20131000	23576000	21102000	20846000	22266000	18482000	22954000	25652000	20045000	18086000	21618000	20284000	21804000
P02788	LTF	sp|P02788|TRFL_HUMAN Lactotransferrin OS=Homo sapiens OX=9606 GN=LTF PE=1 SV=6	1	39	39	37	65.9	78.181		3826900	21133	9980.2	26579	17158					1498.9	1021.4				689.08
P02790	HPX	sp|P02790|HEMO_HUMAN Hemopexin OS=Homo sapiens OX=9606 GN=HPX PE=1 SV=2	1	21	21	21	62.3	51.676	6612200	7190300	6777800	8471000	11026000	9656800	9587100	9965700	9179600	8807200	12998000	12082000	8158800	8728100	7935800	9049500
P02792	FTL	sp|P02792|FRIL_HUMAN Ferritin light chain OS=Homo sapiens OX=9606 GN=FTL PE=1 SV=2	1	10	10	10	54.9	20.019	113650	16974000	263590	318790	232880	71300	39663	33311	31769	18214	18011	33092	41630	29934	150560	40919
P02794	FTH1	sp|P02794|FRIH_HUMAN Ferritin heavy chain OS=Homo sapiens OX=9606 GN=FTH1 PE=1 SV=2	1	12	12	12	72.1	21.225	8411.3	5487900	13682	34744	6832	1428.6									8820
P03950	ANG	sp|P03950|ANGI_HUMAN Angiogenin OS=Homo sapiens OX=9606 GN=ANG PE=1 SV=1	1	4	4	4	23.8	16.55	82119		21230		29973	42471	25174	22198	25868		29246	20622	18068	54065	20418	21389
P03951	F11	sp|P03951|FA11_HUMAN Coagulation factor XI OS=Homo sapiens OX=9606 GN=F11 PE=1 SV=1	1	23	22	22	47.4	70.108	138980	68493	90099	120320	117170	116190	116560	127010	100450	133030	116190	130070	95686	100710	170340	96551
P03952;P20718	KLKB1	sp|P03952|KLKB1_HUMAN Plasma kallikrein OS=Homo sapiens OX=9606 GN=KLKB1 PE=1 SV=1	2	29	29	28	51.1	71.369	4040600	3937600	4260200	6299900	6175200	6656500	5160700	6061100	5304500	6964400	7208700	5776600	5104000	5636200	6790600	6342300
P04003;CON__Q28065	C4BPA	sp|P04003|C4BPA_HUMAN C4b-binding protein alpha chain OS=Homo sapiens OX=9606 GN=C4BPA PE=1 SV=2	2	33	33	33	60.8	67.033	7041800	8754900	8329500	8203100	6815600	7507500	10265000	8190600	8805600	7777300	7478800	7871600	7710300	7922900	8640500	10453000
P04004;CON__Q3ZBS7	VTN	sp|P04004|VTNC_HUMAN Vitronectin OS=Homo sapiens OX=9606 GN=VTN PE=1 SV=1	2	18	18	18	45	54.305	1443600	2730500	1356100	1464500	1631200	1545200	1859500	1767200	1791600	1818500	2718500	1864700	2004700	2129700	1745300	1992400
P04040	CAT	sp|P04040|CATA_HUMAN Catalase OS=Homo sapiens OX=9606 GN=CAT PE=1 SV=3	1	18	18	18	42.3	59.755	224060	503750	153860	109300	189030	69119	77817	52133	84549	48398	34881	65517	50450	50173	44446	26482
P04070	PROC	sp|P04070|PROC_HUMAN Vitamin K-dependent protein C OS=Homo sapiens OX=9606 GN=PROC PE=1 SV=1	1	7	7	7	26.5	52.071	25679	25718		28234	30799	47020	38174	36079	31182	29874	82161	38994	39857	46857	43976	63429
P04075	ALDOA	sp|P04075|ALDOA_HUMAN Fructose-bisphosphate aldolase A OS=Homo sapiens OX=9606 GN=ALDOA PE=1 SV=2	1	9	9	9	41.5	39.42	122920	147720	54037	54279	59049	34134	15095	20408	30844		7550.1	5189	3784.9		4669.4
P04083	ANXA1	sp|P04083|ANXA1_HUMAN Annexin A1 OS=Homo sapiens OX=9606 GN=ANXA1 PE=1 SV=2	1	1	1	1	4.6	38.714
P04114;CON__ENSEMBL:ENSBTAP00000032840	APOB	sp|P04114|APOB_HUMAN Apolipoprotein B-100 OS=Homo sapiens OX=9606 GN=APOB PE=1 SV=2	2	218	218	218	55.4	515.6	1943800	1248900	1660900	1378600	965500	2549600	790510	755100	985930	1543400	2160600	1337600	1502500	1144000	1708900	2352600
P04179	SOD2	sp|P04179|SODM_HUMAN Superoxide dismutase [Mn], mitochondrial OS=Homo sapiens OX=9606 GN=SOD2 PE=1 SV=3	1	2	2	2	13.1	24.75
P04180	LCAT	sp|P04180|LCAT_HUMAN Phosphatidylcholine-sterol acyltransferase OS=Homo sapiens OX=9606 GN=LCAT PE=1 SV=1	1	7	7	7	20	49.577	72182	71104	72512	93908	79950	93991	70677	59975	76892	63562	161430	85660	108650	67432	104600	106530
P04196	HRG	sp|P04196|HRG_HUMAN Histidine-rich glycoprotein OS=Homo sapiens OX=9606 GN=HRG PE=1 SV=1	1	19	19	19	44	59.578	709570	733950	852670	1018200	864480	995590	642870	1068600	1304400	887860	1501500	1407300	1090400	993730	1199100	1469500
P04211	IGLV7-43	sp|P04211|LV743_HUMAN Immunoglobulin lambda variable 7-43 OS=Homo sapiens OX=9606 GN=IGLV7-43 PE=3 SV=2	1	3	1	1	21.4	12.451
P04217;CON__Q2KJF1	A1BG	sp|P04217|A1BG_HUMAN Alpha-1B-glycoprotein OS=Homo sapiens OX=9606 GN=A1BG PE=1 SV=4	2	16	16	16	57.2	54.253	1238800	1121000	1428600	1638100	1891900	1903200	1840100	1180000	1695900	1737400	2463700	1744900	1543600	1799300	1418000	2082900
P04275	VWF	sp|P04275|VWF_HUMAN von Willebrand factor OS=Homo sapiens OX=9606 GN=VWF PE=1 SV=4	1	120	120	120	53.2	309.26	3024500	2646700	9073800	1783100	6010700	2560300	1443700	746360	1562200	1031900	142230	822160	511020	742150	595400	514650
P04278;CON__Q6T181	SHBG	sp|P04278|SHBG_HUMAN Sex hormone-binding globulin OS=Homo sapiens OX=9606 GN=SHBG PE=1 SV=2	2	4	4	4	15.7	43.779							14327			8031.2
P04406	GAPDH	sp|P04406|G3P_HUMAN Glyceraldehyde-3-phosphate dehydrogenase OS=Homo sapiens OX=9606 GN=GAPDH PE=1 SV=3	1	11	11	11	56.7	36.053	76314	1860000	25808	44999	20932	18355	5662									1692.3
P04424	ASL	sp|P04424|ARLY_HUMAN Argininosuccinate lyase OS=Homo sapiens OX=9606 GN=ASL PE=1 SV=4	1	10	10	10	27.6	51.657	49405	380560	3039.1			4844.2	6878.9
P04430	IGKV1-16	sp|P04430|KV116_HUMAN Immunoglobulin kappa variable 1-16 OS=Homo sapiens OX=9606 GN=IGKV1-16 PE=1 SV=2	1	3	3	3	29.1	12.618	216760	503320	687570	246570	633660	365220	734160	406830	1028100	1773200	1090800	980260	596070	828000	442370	1046100
P04439;P01893	HLA-A; HLA-H	sp|P04439|HLAA_HUMAN HLA class I histocompatibility antigen, A alpha chain OS=Homo sapiens OX=9606 GN=HLA-A PE=1 SV=2;sp|P01893|HLAH_HUMAN Putative HLA class I histocompatibility antigen, alpha chain H OS=Homo sapiens OX=9606 GN=HLA-H PE=5 SV=3	2	4	4	3	16.4	40.84			21359		20981	20394	29959	53661	21016	37101		52358	45986
P04792	HSPB1	sp|P04792|HSPB1_HUMAN Heat shock protein beta-1 OS=Homo sapiens OX=9606 GN=HSPB1 PE=1 SV=2	1	3	3	3	21	22.782
P04899;P08754;P63096;P09471;P63092;P19087;Q5JWF2;A8MTJ3;P38405;P11488	GNAI2; GNAI3	sp|P04899|GNAI2_HUMAN Guanine nucleotide-binding protein G(i) subunit alpha-2 OS=Homo sapiens OX=9606 GN=GNAI2 PE=1 SV=3;sp|P08754|GNAI3_HUMAN Guanine nucleotide-binding protein G(i) subunit alpha-3 OS=Homo sapiens OX=9606 GN=GNAI3 PE=1 SV=3;sp|P63096|GNAI	10	4	4	4	15.8	40.45		25841			9270.4	8473.5
P05019	IGF1	sp|P05019|IGF1_HUMAN Insulin-like growth factor I OS=Homo sapiens OX=9606 GN=IGF1 PE=1 SV=1	1	2	2	2	14.9	21.841
P05062	ALDOB	sp|P05062|ALDOB_HUMAN Fructose-bisphosphate aldolase B OS=Homo sapiens OX=9606 GN=ALDOB PE=1 SV=2	1	14	14	14	54.7	39.473	350700	3606000	106800	129030	2464.3	39416	172630	2638.9	37873		1953.2		3027		5396.9	2972.4
P05089	ARG1	sp|P05089|ARGI1_HUMAN Arginase-1 OS=Homo sapiens OX=9606 GN=ARG1 PE=1 SV=2	1	6	6	6	27.3	34.735
P05090	APOD	sp|P05090|APOD_HUMAN Apolipoprotein D OS=Homo sapiens OX=9606 GN=APOD PE=1 SV=1	1	7	7	7	34.9	21.275	721970	963900	1657700	1944100	1511000	1218500	1249800	1665200	1022100	1653900	1971200	1600500	1470500	1259500	1388900	1630700
P05091	ALDH2	sp|P05091|ALDH2_HUMAN Aldehyde dehydrogenase, mitochondrial OS=Homo sapiens OX=9606 GN=ALDH2 PE=1 SV=2	1	7	7	7	18.2	56.381
P05106	ITGB3	sp|P05106|ITB3_HUMAN Integrin beta-3 OS=Homo sapiens OX=9606 GN=ITGB3 PE=1 SV=2	1	4	4	4	7.2	87.057		12334				31323
P05109	S100A8	sp|P05109|S10A8_HUMAN Protein S100-A8 OS=Homo sapiens OX=9606 GN=S100A8 PE=1 SV=1	1	5	5	5	40.9	10.834	295270	1576700	551410	372350	410090	730030	39610	42266		42664	188000	28204		29166	30232	53775
P05121	SERPINE1	sp|P05121|PAI1_HUMAN Plasminogen activator inhibitor 1 OS=Homo sapiens OX=9606 GN=SERPINE1 PE=1 SV=1	1	6	6	6	24.9	45.059		73621	67062
P05154	SERPINA5	sp|P05154|IPSP_HUMAN Plasma serine protease inhibitor OS=Homo sapiens OX=9606 GN=SERPINA5 PE=1 SV=3	1	11	11	11	27.3	45.674	123880	159160	80894	82766	97906	243400	92676	75594	85382	111620	221870	103070	179800	148920	153200	114630
P05155;CON__P50448	SERPING1	sp|P05155|IC1_HUMAN Plasma protease C1 inhibitor OS=Homo sapiens OX=9606 GN=SERPING1 PE=1 SV=2	2	15	15	15	28.6	55.154	3137700	2499300	2465500	3287300	3073400	2818700	2819200	2949600	3107800	2797000	3806900	3302800	2861900	2593700	2493900	2921400
P05156;CON__Q32PI4	CFI	sp|P05156|CFAI_HUMAN Complement factor I OS=Homo sapiens OX=9606 GN=CFI PE=1 SV=2	2	22	22	22	44.3	65.75	746570	502530	702640	717560	645250	905400	731650	683070	1046300	947730	1289100	831310	745790	888280	848030	1099600
P05160;CON__Q2TBQ1	F13B	sp|P05160|F13B_HUMAN Coagulation factor XIII B chain OS=Homo sapiens OX=9606 GN=F13B PE=1 SV=3	2	23	23	23	43.7	75.51	240360	390510	472600	247350	328420	215680	251500	302820	224630	239550	187140	189500	188470	213960	272680	230760
P05164	MPO	sp|P05164|PERM_HUMAN Myeloperoxidase OS=Homo sapiens OX=9606 GN=MPO PE=1 SV=1	1	22	22	22	37	83.868	2133.2	1080900	12099	14128	1218.7	3248.7									1877.5	756.25
P05165	PCCA	sp|P05165|PCCA_HUMAN Propionyl-CoA carboxylase alpha chain, mitochondrial OS=Homo sapiens OX=9606 GN=PCCA PE=1 SV=4	1	6	6	6	10.7	80.058
P05166	PCCB	sp|P05166|PCCB_HUMAN Propionyl-CoA carboxylase beta chain, mitochondrial OS=Homo sapiens OX=9606 GN=PCCB PE=1 SV=3	1	2	2	2	5.8	58.215
P05387	RPLP2	sp|P05387|RLA2_HUMAN 60S acidic ribosomal protein P2 OS=Homo sapiens OX=9606 GN=RPLP2 PE=1 SV=1	1	5	5	5	69.6	11.665
P05388;Q8NHW5	RPLP0; RPLP0P6	sp|P05388|RLA0_HUMAN 60S acidic ribosomal protein P0 OS=Homo sapiens OX=9606 GN=RPLP0 PE=1 SV=1;sp|Q8NHW5|RLA0L_HUMAN 60S acidic ribosomal protein P0-like OS=Homo sapiens OX=9606 GN=RPLP0P6 PE=5 SV=1	2	7	7	7	29.3	34.273
P05543;CON__Q9TT36	SERPINA7	sp|P05543|THBG_HUMAN Thyroxine-binding globulin OS=Homo sapiens OX=9606 GN=SERPINA7 PE=1 SV=2	2	14	14	14	45.3	46.324	250670	114920	169380	233280	154020	184450	185560	216930	221470	217390	229690	223940	183400	206980	165800	209400
P05546;CON__ENSEMBL:ENSBTAP00000018574	SERPIND1	sp|P05546|HEP2_HUMAN Heparin cofactor 2 OS=Homo sapiens OX=9606 GN=SERPIND1 PE=1 SV=3	2	18	18	18	40.3	57.07	1006100	508200	837470	858310	808270	1216900	537190	982610	426750	1126700	1493000	1178500	918940	1509800	1080700	991860
P06276	BCHE	sp|P06276|CHLE_HUMAN Cholinesterase OS=Homo sapiens OX=9606 GN=BCHE PE=1 SV=1	1	17	17	17	37	68.417	232320	200680	218120	391480	272050	268920	340320	310760	347920	439230	347840	375110	262740	447270	445440	367770
P06312	IGKV4-1	sp|P06312|KV401_HUMAN Immunoglobulin kappa variable 4-1 OS=Homo sapiens OX=9606 GN=IGKV4-1 PE=1 SV=1	1	4	4	4	29.8	13.38	1671600	1858100	1935100	1752900	2302300	1825700	1784100	1966100	2401100	2514400	1699500	2571800	2482900	2406200	1977200	2377100
P06331	IGHV4-34	sp|P06331|HV434_HUMAN Immunoglobulin heavy variable 4-34 OS=Homo sapiens OX=9606 GN=IGHV4-34 PE=1 SV=2	1	3	3	1	37.4	13.815	3945200	4676200	4984900	2983000	7076400	4287500	4404000	5787300	8933000	5316700	5062400	5080500	4296000	4488200	3862300	5052400
P06576	ATP5F1B	sp|P06576|ATPB_HUMAN ATP synthase subunit beta, mitochondrial OS=Homo sapiens OX=9606 GN=ATP5F1B PE=1 SV=3	1	3	3	3	8.9	56.559
P06681	C2	sp|P06681|CO2_HUMAN Complement C2 OS=Homo sapiens OX=9606 GN=C2 PE=1 SV=2	1	29	29	29	41.9	83.267	495630	171360	334350	310720	381970	393830	405160	406780	417170	335870	405080	365130	361230	378140	319890	369750
P06702	S100A9	sp|P06702|S10A9_HUMAN Protein S100-A9 OS=Homo sapiens OX=9606 GN=S100A9 PE=1 SV=1	1	7	7	7	81.6	13.242	227570	2243700	477530	295500	342050	627490	44485	46417	33438	77458	153490	38519	41629	33233	20731	85110
P06727	APOA4	sp|P06727|APOA4_HUMAN Apolipoprotein A-IV OS=Homo sapiens OX=9606 GN=APOA4 PE=1 SV=4	1	28	28	26	69.7	45.371	437580	454320	191430	573040	614910	1376600	421500	1101800	509420	1207500	1175400	1015600	1433100	557840	1138900	959640
P06732	CKM	sp|P06732|KCRM_HUMAN Creatine kinase M-type OS=Homo sapiens OX=9606 GN=CKM PE=1 SV=2	1	7	7	7	27.3	43.101	52922	65352	28987	118750	71334
P06733	ENO1	sp|P06733|ENOA_HUMAN Alpha-enolase OS=Homo sapiens OX=9606 GN=ENO1 PE=1 SV=2	1	11	11	10	38.2	47.168	54872	349240	15097	33197	25579	32867
P06737	PYGL	sp|P06737|PYGL_HUMAN Glycogen phosphorylase, liver form OS=Homo sapiens OX=9606 GN=PYGL PE=1 SV=4	1	26	26	22	36.8	97.147	2661.1	395890				804.98	4310.2
P06748	NPM1	sp|P06748|NPM_HUMAN Nucleophosmin OS=Homo sapiens OX=9606 GN=NPM1 PE=1 SV=2	1	2	2	2	11.9	32.575
P06858	LPL	sp|P06858|LIPL_HUMAN Lipoprotein lipase OS=Homo sapiens OX=9606 GN=LPL PE=1 SV=1	1	1	1	1	4	53.162
P33778;Q16778;P23527;Q8N257;P06899;Q6DRA6;Q6DN03	H2BC3; H2BC21; H2BC17	sp|P33778|H2B1B_HUMAN Histone H2B type 1-B OS=Homo sapiens OX=9606 GN=H2BC3 PE=1 SV=2;sp|Q16778|H2B2E_HUMAN Histone H2B type 2-E OS=Homo sapiens OX=9606 GN=H2BC21 PE=1 SV=3;sp|P23527|H2B1O_HUMAN Histone H2B type 1-O OS=Homo sapiens OX=9606 GN=H2BC17 PE=1 S	7	4	1	1	34.9	13.95
P07099	EPHX1	sp|P07099|HYEP_HUMAN Epoxide hydrolase 1 OS=Homo sapiens OX=9606 GN=EPHX1 PE=1 SV=1	1	15	15	15	45.3	52.948		555890									9269.4					8864
P07148	FABP1	sp|P07148|FABPL_HUMAN Fatty acid-binding protein, liver OS=Homo sapiens OX=9606 GN=FABP1 PE=1 SV=1	1	6	6	6	69.3	14.208		483130		7737.5		17165
P07195	LDHB	sp|P07195|LDHB_HUMAN L-lactate dehydrogenase B chain OS=Homo sapiens OX=9606 GN=LDHB PE=1 SV=2	1	9	8	8	36.2	36.638	46485	111960	41418	19601	33258	18746	32157	19996	15052	6136.1	9687	7030.2	8041.8	14366	11123	10019
P07203	GPX1	sp|P07203|GPX1_HUMAN Glutathione peroxidase 1 OS=Homo sapiens OX=9606 GN=GPX1 PE=1 SV=4	1	3	3	3	21.2	22.088
P07225;CON__P07224	PROS1	sp|P07225|PROS_HUMAN Vitamin K-dependent protein S OS=Homo sapiens OX=9606 GN=PROS1 PE=1 SV=1	2	22	22	22	38.8	75.122	761750	866150	833760	934650	748850	898600	1087500	929220	914370	948730	939430	889370	925340	922340	1084800	1082800
P07237	P4HB	sp|P07237|PDIA1_HUMAN Protein disulfide-isomerase OS=Homo sapiens OX=9606 GN=P4HB PE=1 SV=3	1	4	4	4	7.3	57.116
P07327	ADH1A	sp|P07327|ADH1A_HUMAN Alcohol dehydrogenase 1A OS=Homo sapiens OX=9606 GN=ADH1A PE=1 SV=2	1	16	4	3	49.9	39.858
P07333	CSF1R	sp|P07333|CSF1R_HUMAN Macrophage colony-stimulating factor 1 receptor OS=Homo sapiens OX=9606 GN=CSF1R PE=1 SV=2	1	1	1	1	1.6	107.98
P07339	CTSD	sp|P07339|CATD_HUMAN Cathepsin D OS=Homo sapiens OX=9606 GN=CTSD PE=1 SV=1	1	2	2	2	6.8	44.552		17269				6697.4
P07355;A6NMY6	ANXA2; ANXA2P2	sp|P07355|ANXA2_HUMAN Annexin A2 OS=Homo sapiens OX=9606 GN=ANXA2 PE=1 SV=2;sp|A6NMY6|AXA2L_HUMAN Putative annexin A2-like protein OS=Homo sapiens OX=9606 GN=ANXA2P2 PE=5 SV=2	2	7	7	7	25.4	38.604		12488			9927.9
P07357	C8A	sp|P07357|CO8A_HUMAN Complement component C8 alpha chain OS=Homo sapiens OX=9606 GN=C8A PE=1 SV=2	1	20	20	20	46.6	65.163	1104000	695310	960400	643820	815550	1040100	1068300	922240	942410	918020	1041200	1042800	1077400	1091800	1113000	1120300
P07358	C8B	sp|P07358|CO8B_HUMAN Complement component C8 beta chain OS=Homo sapiens OX=9606 GN=C8B PE=1 SV=3	1	23	23	23	45	67.046	756830	469750	610010	457100	523470	659740	744340	601870	664390	616440	754520	739080	758360	776160	802150	758170
P07359	GP1BA	sp|P07359|GP1BA_HUMAN Platelet glycoprotein Ib alpha chain OS=Homo sapiens OX=9606 GN=GP1BA PE=1 SV=2	1	5	5	5	8.3	71.539	28705	28335	30543	36962	31722	34078	24577	24785	12992	19724	36564	23526	17866	30090	5701.8	11059
P07360	C8G	sp|P07360|CO8G_HUMAN Complement component C8 gamma chain OS=Homo sapiens OX=9606 GN=C8G PE=1 SV=3	1	11	11	11	65.8	22.277	1083900	610180	826300	604580	706000	1010500	987070	809190	933460	824730	1028100	992650	1051300	1076100	1044100	1007900
P07437;Q9BUF5	TUBB	sp|P07437|TBB5_HUMAN Tubulin beta chain OS=Homo sapiens OX=9606 GN=TUBB PE=1 SV=2	2	15	2	1	47.1	49.67	20698	164680
P07451	CA3	sp|P07451|CAH3_HUMAN Carbonic anhydrase 3 OS=Homo sapiens OX=9606 GN=CA3 PE=1 SV=3	1	3	3	3	13.8	29.557		35810			89142
P07737;CON__P02584	PFN1	sp|P07737|PROF1_HUMAN Profilin-1 OS=Homo sapiens OX=9606 GN=PFN1 PE=1 SV=2	2	5	5	5	45	15.054	42290	80676			23391	38394
P07741	APRT	sp|P07741|APT_HUMAN Adenine phosphoribosyltransferase OS=Homo sapiens OX=9606 GN=APRT PE=1 SV=2	1	2	2	2	11.7	19.608
P07858	CTSB	sp|P07858|CATB_HUMAN Cathepsin B OS=Homo sapiens OX=9606 GN=CTSB PE=1 SV=3	1	3	3	3	13	37.821
P07900;Q14568;Q58FG0;Q58FG1	HSP90AA1	sp|P07900|HS90A_HUMAN Heat shock protein HSP 90-alpha OS=Homo sapiens OX=9606 GN=HSP90AA1 PE=1 SV=5	4	18	18	10	28.8	84.659	8242	463160	7343.9	7271.2	1497.7	3990.6	1998.6
P07902	GALT	sp|P07902|GALT_HUMAN Galactose-1-phosphate uridylyltransferase OS=Homo sapiens OX=9606 GN=GALT PE=1 SV=3	1	3	3	3	10.6	43.363
P07919	UQCRH	sp|P07919|QCR6_HUMAN Cytochrome b-c1 complex subunit 6, mitochondrial OS=Homo sapiens OX=9606 GN=UQCRH PE=1 SV=2	1	1	1	1	19.8	10.739
P07954	FH	sp|P07954|FUMH_HUMAN Fumarate hydratase, mitochondrial OS=Homo sapiens OX=9606 GN=FH PE=1 SV=3	1	7	7	7	22	54.636		95631								14232			58695
P08123	COL1A2	sp|P08123|CO1A2_HUMAN Collagen alpha-2(I) chain OS=Homo sapiens OX=9606 GN=COL1A2 PE=1 SV=7	1	3	3	3	2.2	129.31
P08134;P61586	RHOC; RHOA	sp|P08134|RHOC_HUMAN Rho-related GTP-binding protein RhoC OS=Homo sapiens OX=9606 GN=RHOC PE=1 SV=1;sp|P61586|RHOA_HUMAN Transforming protein RhoA OS=Homo sapiens OX=9606 GN=RHOA PE=1 SV=1	2	4	4	4	19.7	22.006
P08185	SERPINA6	sp|P08185|CBG_HUMAN Corticosteroid-binding globulin OS=Homo sapiens OX=9606 GN=SERPINA6 PE=1 SV=1	1	9	9	9	29.9	45.14	551460	300450	406520	569480	548200	473780	431350	486200	296430	559540	640950	569030	460390	456730	245400	386450
P08195	SLC3A2	sp|P08195|4F2_HUMAN 4F2 cell-surface antigen heavy chain OS=Homo sapiens OX=9606 GN=SLC3A2 PE=1 SV=3	1	4	4	4	10	67.993	39962	10118	5659.9
P08238;Q58FF7	HSP90AB1	sp|P08238|HS90B_HUMAN Heat shock protein HSP 90-beta OS=Homo sapiens OX=9606 GN=HSP90AB1 PE=1 SV=4	2	16	8	7	29.8	83.263	21289	269350	9337.5			8258.1	3722.6
P08246	ELANE	sp|P08246|ELNE_HUMAN Neutrophil elastase OS=Homo sapiens OX=9606 GN=ELANE PE=1 SV=1	1	3	3	3	9.4	28.518		108280			8966.7	10719
P08263;Q16772;Q7RTV2	GSTA1; GSTA3	sp|P08263|GSTA1_HUMAN Glutathione S-transferase A1 OS=Homo sapiens OX=9606 GN=GSTA1 PE=1 SV=3;sp|Q16772|GSTA3_HUMAN Glutathione S-transferase A3 OS=Homo sapiens OX=9606 GN=GSTA3 PE=1 SV=3	3	10	10	1	41.4	25.631		799900		4028.9	3357.1		4701.7				3405	3305.8
P08294	SOD3	sp|P08294|SODE_HUMAN Extracellular superoxide dismutase [Cu-Zn] OS=Homo sapiens OX=9606 GN=SOD3 PE=1 SV=2	1	4	4	4	25.8	25.851
P08311	CTSG	sp|P08311|CATG_HUMAN Cathepsin G OS=Homo sapiens OX=9606 GN=CTSG PE=1 SV=2	1	3	3	3	20.4	28.837
P08319	ADH4	sp|P08319|ADH4_HUMAN All-trans-retinol dehydrogenase [NAD(+)] ADH4 OS=Homo sapiens OX=9606 GN=ADH4 PE=1 SV=5	1	22	22	21	79.5	40.221	2744.3	3970400	20531	86628		4566.2	15726
P08514	ITGA2B	sp|P08514|ITA2B_HUMAN Integrin alpha-IIb OS=Homo sapiens OX=9606 GN=ITGA2B PE=1 SV=3	1	2	2	2	2.5	113.38
P08519	LPA	sp|P08519|APOA_HUMAN Apolipoprotein(a) OS=Homo sapiens OX=9606 GN=LPA PE=1 SV=1	1	18	16	16	30.1	501.31	80563	681760	872680	332760	114850	15562	66925	119950	305140			181410	135050	268180	350970	55711
P08571	CD14	sp|P08571|CD14_HUMAN Monocyte differentiation antigen CD14 OS=Homo sapiens OX=9606 GN=CD14 PE=1 SV=2	1	8	8	8	30.1	40.076	56073	38350	38330	35762	45016	76019	46902	33673	42924	43183	52050	36369	30984	19193	24198	31063
P08603	CFH	sp|P08603|CFAH_HUMAN Complement factor H OS=Homo sapiens OX=9606 GN=CFH PE=1 SV=4	1	65	65	57	61.1	139.09	3002900	1872700	2179500	2024900	2131300	2597300	2261700	2588100	2229000	2219700	2798100	2273900	2143800	2505200	2108600	2117600
P08637	FCGR3A	sp|P08637|FCG3A_HUMAN Low affinity immunoglobulin gamma Fc region receptor III-A OS=Homo sapiens OX=9606 GN=FCGR3A PE=1 SV=2	1	3	3	1	12.2	29.089	43184	31628	78034	22158	66105	42472	46202	31550	60323	26214	25774	26704	28195		18312
P08670	VIM	sp|P08670|VIME_HUMAN Vimentin OS=Homo sapiens OX=9606 GN=VIM PE=1 SV=4	1	6	5	5	15.9	53.651	19364	26153
P08697;CON__P28800	SERPINF2	sp|P08697|A2AP_HUMAN Alpha-2-antiplasmin OS=Homo sapiens OX=9606 GN=SERPINF2 PE=1 SV=3	2	17	17	17	44	54.565	2323800	1797600	1731300	1857100	2353300	1865000	2022400	2090000	1759500	2177600	2771100	2483500	1904000	2087000	1710600	2262900
P08709	F7	sp|P08709|FA7_HUMAN Coagulation factor VII OS=Homo sapiens OX=9606 GN=F7 PE=1 SV=1	1	2	2	2	5.4	51.593
P08758	ANXA5	sp|P08758|ANXA5_HUMAN Annexin A5 OS=Homo sapiens OX=9606 GN=ANXA5 PE=1 SV=2	1	2	2	2	9.7	35.936
P08865	RPSA	sp|P08865|RSSA_HUMAN 40S ribosomal protein SA OS=Homo sapiens OX=9606 GN=RPSA PE=1 SV=4	1	8	8	8	44.7	32.854
P09110	ACAA1	sp|P09110|THIK_HUMAN 3-ketoacyl-CoA thiolase, peroxisomal OS=Homo sapiens OX=9606 GN=ACAA1 PE=1 SV=2	1	3	3	3	13.2	44.292
P09172	DBH	sp|P09172|DOPO_HUMAN Dopamine beta-hydroxylase OS=Homo sapiens OX=9606 GN=DBH PE=1 SV=3	1	11	11	11	29	69.064	35579	24096	26825		63070		54506	111860	38080		40579	110380	12314	97504	17752	38954
P09382	LGALS1	sp|P09382|LEG1_HUMAN Galectin-1 OS=Homo sapiens OX=9606 GN=LGALS1 PE=1 SV=2	1	4	4	4	45.2	14.716
P09417	QDPR	sp|P09417|DHPR_HUMAN Dihydropteridine reductase OS=Homo sapiens OX=9606 GN=QDPR PE=1 SV=2	1	3	3	3	23.4	25.789
P09467;O00757	FBP1	sp|P09467|F16P1_HUMAN Fructose-1,6-bisphosphatase 1 OS=Homo sapiens OX=9606 GN=FBP1 PE=1 SV=5	2	17	17	17	53.8	36.842		385470	489.21	672.29			373.26
P09651;Q32P51	HNRNPA1; HNRNPA1L2	sp|P09651|ROA1_HUMAN Heterogeneous nuclear ribonucleoprotein A1 OS=Homo sapiens OX=9606 GN=HNRNPA1 PE=1 SV=5;sp|Q32P51|RA1L2_HUMAN Heterogeneous nuclear ribonucleoprotein A1-like 2 OS=Homo sapiens OX=9606 GN=HNRNPA1L2 PE=2 SV=2	2	4	4	4	15.6	38.746	18192	31403
P09871	C1S	sp|P09871|C1S_HUMAN Complement C1s subcomponent OS=Homo sapiens OX=9606 GN=C1S PE=1 SV=1	1	22	22	21	38.2	76.684	4089100	3184900	1723500	1934300	1974200	1889600	2490900	2472900	2387700	2822900	3081800	2311000	2237600	2455700	2380900	1940400
P09960	LTA4H	sp|P09960|LKHA4_HUMAN Leukotriene A-4 hydrolase OS=Homo sapiens OX=9606 GN=LTA4H PE=1 SV=2	1	2	2	2	5.4	69.284
P09972	ALDOC	sp|P09972|ALDOC_HUMAN Fructose-bisphosphate aldolase C OS=Homo sapiens OX=9606 GN=ALDOC PE=1 SV=2	1	2	2	2	10.4	39.455
P0C0L4;CON__ENSEMBL:ENSBTAP00000007350	C4A	sp|P0C0L4|CO4A_HUMAN Complement C4-A OS=Homo sapiens OX=9606 GN=C4A PE=1 SV=2	2	89	89	4	58.4	192.78	9298400	5305700	7660900	7124800	6962000	12360000	9838400	6852100	11331000	7082700	6262900	7074200	8128100	8417100	7142000	7536100
P0C0L5	C4B	sp|P0C0L5|CO4B_HUMAN Complement C4-B OS=Homo sapiens OX=9606 GN=C4B PE=1 SV=2	1	89	5	5	58.4	192.75	3169800	1711600	2867700	2445500	2684300	3476300	3263000	3184900	3745600	2289600	2132300	2786100	3847900	2812300	2597200	3386900
Q6FI13;P0C0S8;Q99878;Q9BTM1;Q16777;Q96KK5;P20671;Q93077;Q7L7L0;P04908;Q71UI9;P0C0S5	H2AC18; H2AC11; H2AC14	sp|Q6FI13|H2A2A_HUMAN Histone H2A type 2-A OS=Homo sapiens OX=9606 GN=H2AC18 PE=1 SV=3;sp|P0C0S8|H2A1_HUMAN Histone H2A type 1 OS=Homo sapiens OX=9606 GN=H2AC11 PE=1 SV=2;sp|Q99878|H2A1J_HUMAN Histone H2A type 1-J OS=Homo sapiens OX=9606 GN=H2AC14 PE=1 SV=	12	4	4	2	35.4	14.095	114010	3124000	135180	74506	84486	281300	21555
P0CG48;P0CG47;P62979;P62987	UBC; UBB; RPS27A	sp|P0CG48|UBC_HUMAN Polyubiquitin-C OS=Homo sapiens OX=9606 GN=UBC PE=1 SV=3;sp|P0CG47|UBB_HUMAN Polyubiquitin-B OS=Homo sapiens OX=9606 GN=UBB PE=1 SV=1;sp|P62979|RS27A_HUMAN Ubiquitin-40S ribosomal protein S27a OS=Homo sapiens OX=9606 GN=RPS27A PE=1 SV=2	4	3	3	3	44.7	77.038	27611	181360	134230	26233	47673	42443	59862		28242	22195	39002	22536		35358		40631
P0DJI8	SAA1	sp|P0DJI8|SAA1_HUMAN Serum amyloid A-1 protein OS=Homo sapiens OX=9606 GN=SAA1 PE=1 SV=1	1	9	9	4	62.3	13.532	1214700	7482.6	387680	503520	10712	41701	1096600	891920	265960	374180	9028.4	25952		9526.2		3695.3
P0DJI9	SAA2	sp|P0DJI9|SAA2_HUMAN Serum amyloid A-2 protein OS=Homo sapiens OX=9606 GN=SAA2 PE=1 SV=1	1	7	2	2	43.4	13.527	84595							20988
P0DMV8;P0DMV9	HSPA1A; HSPA1B	sp|P0DMV8|HS71A_HUMAN Heat shock 70 kDa protein 1A OS=Homo sapiens OX=9606 GN=HSPA1A PE=1 SV=1;sp|P0DMV9|HS71B_HUMAN Heat shock 70 kDa protein 1B OS=Homo sapiens OX=9606 GN=HSPA1B PE=1 SV=1	2	23	23	12	46.5	70.051	171300	4233700	126940	161040	42475	77316	50104	50048	67240	58013	59477	61386	57783	66090	54099	57227
P35520;P0DN79	CBS; CBSL	sp|P35520|CBS_HUMAN Cystathionine beta-synthase OS=Homo sapiens OX=9606 GN=CBS PE=1 SV=2;sp|P0DN79|CBSL_HUMAN Cystathionine beta-synthase-like protein OS=Homo sapiens OX=9606 GN=CBSL PE=1 SV=1	2	7	7	7	18.5	60.586
P0DOX2		sp|P0DOX2|IGA2_HUMAN Immunoglobulin alpha-2 heavy chain OS=Homo sapiens OX=9606 PE=1 SV=2	1	19	19	5	61.3	48.934	18204000	12400000	16664000	16372000	16971000	13613000	16705000	15246000	18793000	16000000	16386000	16160000	13941000	13797000	13975000	19555000
P0DOX3;P01880	IGHD	sp|P0DOX3|IGD_HUMAN Immunoglobulin delta heavy chain OS=Homo sapiens OX=9606 PE=1 SV=1;sp|P01880|IGHD_HUMAN Immunoglobulin heavy constant delta OS=Homo sapiens OX=9606 GN=IGHD PE=1 SV=3	2	14	14	14	40.4	56.224	219470	523410	222010	185980	895560	185590	1754700	683980	600600	208110	496450	918820	1262300	228750	128790	199640
P0DOX5;P01857	IGHG1	sp|P0DOX5|IGG1_HUMAN Immunoglobulin gamma-1 heavy chain OS=Homo sapiens OX=9606 PE=1 SV=2;sp|P01857|IGHG1_HUMAN Immunoglobulin heavy constant gamma 1 OS=Homo sapiens OX=9606 GN=IGHG1 PE=1 SV=1	2	26	26	17	65.5	49.328	58601000	58718000	60786000	83951000	85248000	58417000	84325000	86209000	79263000	76472000	80545000	73358000	103090000	78383000	69929000	82873000
P0DOX6		sp|P0DOX6|IGM_HUMAN Immunoglobulin mu heavy chain OS=Homo sapiens OX=9606 PE=1 SV=2	1	21	3	2	45.7	63.485	70382	266970	86624				70876		389490							678630
P0DOX7		sp|P0DOX7|IGK_HUMAN Immunoglobulin kappa light chain OS=Homo sapiens OX=9606 PE=1 SV=1	1	13	13	5	67.8	23.379	29935000	31452000	31999000	35442000	36050000	31265000	34329000	32905000	42395000	35522000	29738000	35924000	37487000	35132000	27517000	42558000
P0DOX8;B9A064;P0CG04	IGLL5	sp|P0DOX8|IGL1_HUMAN Immunoglobulin lambda-1 light chain OS=Homo sapiens OX=9606 PE=1 SV=1;sp|B9A064|IGLL5_HUMAN Immunoglobulin lambda-like polypeptide 5 OS=Homo sapiens OX=9606 GN=IGLL5 PE=2 SV=2;sp|P0CG04|IGLC1_HUMAN Immunoglobulin lambda constant 1 OS=H	3	9	9	4	51.4	22.83	27719000	26729000	25768000	33333000	22668000	21482000	25792000	31915000	43540000	31102000	27534000	29502000	30495000	33725000	27302000	34114000
P0DOY2;P0DOY3;P0CF74	IGLC2; IGLC3	sp|P0DOY2|IGLC2_HUMAN Immunoglobulin lambda constant 2 OS=Homo sapiens OX=9606 GN=IGLC2 PE=1 SV=1;sp|P0DOY3|IGLC3_HUMAN Immunoglobulin lambda constant 3 OS=Homo sapiens OX=9606 GN=IGLC3 PE=1 SV=1	3	7	3	2	88.7	11.293	71134000	71036000	69742000	82741000	86612000	64301000	73724000	69430000	71546000	69029000	55242000	69005000	83126000	84575000	59036000	77605000
P0DP01	IGHV1-8	sp|P0DP01|HV108_HUMAN Immunoglobulin heavy variable 1-8 OS=Homo sapiens OX=9606 GN=IGHV1-8 PE=3 SV=1	1	2	1	1	22.2	12.992
P0DP02	IGHV3-30-3	sp|P0DP02|HVC33_HUMAN Immunoglobulin heavy variable 3-30-3 OS=Homo sapiens OX=9606 GN=IGHV3-30-3 PE=3 SV=1	1	5	4	0	53.8	12.989	604340	1056700	1021100	1483400	819030	950570	1736400	1620100	2025000	1893400	1384900	1955800	1012400	2191500	1269300	1692000
P0DP08	IGHV4-38-2	sp|P0DP08|HVD82_HUMAN Immunoglobulin heavy variable 4-38-2 OS=Homo sapiens OX=9606 GN=IGHV4-38-2 PE=3 SV=1	1	3	1	1	39.3	13.016
P0DP25;P0DP24;P0DP23	CALM3; CALM2; CALM1	sp|P0DP25|CALM3_HUMAN Calmodulin-3 OS=Homo sapiens OX=9606 GN=CALM3 PE=1 SV=1;sp|P0DP24|CALM2_HUMAN Calmodulin-2 OS=Homo sapiens OX=9606 GN=CALM2 PE=1 SV=1;sp|P0DP23|CALM1_HUMAN Calmodulin-1 OS=Homo sapiens OX=9606 GN=CALM1 PE=1 SV=1	3	2	2	2	20.1	16.837	17489	54828			10315	13658
P0DTE1	IGHV3-38-3	sp|P0DTE1|HV383_HUMAN Probable non-functional immunoglobulin heavy variable 3-38-3 OS=Homo sapiens OX=9606 GN=IGHV3-38-3 PE=1 SV=1	1	2	2	2	18.3	12.671	42971	22158		76436		53634			24270				111870	19021
P0DTE2	IGHV8-51-1	sp|P0DTE2|HV511_HUMAN Probable non-functional immunoglobulin heavy variable 8-51-1 OS=Homo sapiens OX=9606 GN=IGHV8-51-1 PE=1 SV=1	1	1	1	1	8.7	13.081
P10599	TXN	sp|P10599|THIO_HUMAN Thioredoxin OS=Homo sapiens OX=9606 GN=TXN PE=1 SV=3	1	2	2	2	21	11.737		153040		26821	32510						35015	19827	26153		11140
P10620	MGST1	sp|P10620|MGST1_HUMAN Microsomal glutathione S-transferase 1 OS=Homo sapiens OX=9606 GN=MGST1 PE=1 SV=1	1	3	3	3	19.4	17.598
P10643	C7	sp|P10643|CO7_HUMAN Complement component C7 OS=Homo sapiens OX=9606 GN=C7 PE=1 SV=2	1	30	30	27	47.2	93.517	533830	334930	446690	473810	544100	715230	527050	769060	459830	499650	337980	356380	477790	471290	421880	356590
P10768	ESD	sp|P10768|ESTD_HUMAN S-formylglutathione hydrolase OS=Homo sapiens OX=9606 GN=ESD PE=1 SV=2	1	3	3	3	15.2	31.462
P10809	HSPD1	sp|P10809|CH60_HUMAN 60 kDa heat shock protein, mitochondrial OS=Homo sapiens OX=9606 GN=HSPD1 PE=1 SV=2	1	4	4	4	13.8	61.054
P10909	CLU	sp|P10909|CLUS_HUMAN Clusterin OS=Homo sapiens OX=9606 GN=CLU PE=1 SV=1	1	14	14	14	33.2	52.494	3967900	4439400	2501500	2751800	2523600	2694400	4109200	3307000	2538300	2711000	2307400	2913200	3260800	2668100	2674000	2614500
P11021	HSPA5	sp|P11021|BIP_HUMAN Endoplasmic reticulum chaperone BiP OS=Homo sapiens OX=9606 GN=HSPA5 PE=1 SV=2	1	8	7	7	17	72.332	28413	65803	43353	42349			23672	25118	31538	19186	32018	27996	32780	21764	18580	26488
P11047	LAMC1	sp|P11047|LAMC1_HUMAN Laminin subunit gamma-1 OS=Homo sapiens OX=9606 GN=LAMC1 PE=1 SV=3	1	1	1	1	1.1	177.6
P11142;P54652	HSPA8	sp|P11142|HSP7C_HUMAN Heat shock cognate 71 kDa protein OS=Homo sapiens OX=9606 GN=HSPA8 PE=1 SV=1	2	17	15	14	34.2	70.897	66362	1028900	52297	53860	29066	25154					10735	9822.5				9139
P11168	SLC2A2	sp|P11168|GTR2_HUMAN Solute carrier family 2, facilitated glucose transporter member 2 OS=Homo sapiens OX=9606 GN=SLC2A2 PE=1 SV=1	1	1	1	1	2.5	57.489
P11216	PYGB	sp|P11216|PYGB_HUMAN Glycogen phosphorylase, brain form OS=Homo sapiens OX=9606 GN=PYGB PE=1 SV=5	1	10	6	6	17.4	96.695
P11217	PYGM	sp|P11217|PYGM_HUMAN Glycogen phosphorylase, muscle form OS=Homo sapiens OX=9606 GN=PYGM PE=1 SV=6	1	14	10	9	23.9	97.091	36318	14726		15097			53608
P11226	MBL2	sp|P11226|MBL2_HUMAN Mannose-binding protein C OS=Homo sapiens OX=9606 GN=MBL2 PE=1 SV=2	1	8	8	8	32.3	26.143	44018	120860	404440	182390	95983	164340	80805	440960	180790	11469	4986.9	184920	156410	125220	106670	216060
P11310	ACADM	sp|P11310|ACADM_HUMAN Medium-chain specific acyl-CoA dehydrogenase, mitochondrial OS=Homo sapiens OX=9606 GN=ACADM PE=1 SV=1	1	2	2	2	5.2	46.588
P11413	G6PD	sp|P11413|G6PD_HUMAN Glucose-6-phosphate 1-dehydrogenase OS=Homo sapiens OX=9606 GN=G6PD PE=1 SV=4	1	2	2	2	5.2	59.256
P11498	PC	sp|P11498|PYC_HUMAN Pyruvate carboxylase, mitochondrial OS=Homo sapiens OX=9606 GN=PC PE=1 SV=2	1	4	4	4	4.7	129.63
P11586	MTHFD1	sp|P11586|C1TC_HUMAN C-1-tetrahydrofolate synthase, cytoplasmic OS=Homo sapiens OX=9606 GN=MTHFD1 PE=1 SV=4	1	34	34	34	45.1	101.53	8483.3	684090		1925.3
P11597	CETP	sp|P11597|CETP_HUMAN Cholesteryl ester transfer protein OS=Homo sapiens OX=9606 GN=CETP PE=1 SV=2	1	6	6	6	18.7	54.756			24506	17397	15320	15560	11172	24842	19233				21022	17740		17450
P11678	EPX	sp|P11678|PERE_HUMAN Eosinophil peroxidase OS=Homo sapiens OX=9606 GN=EPX PE=1 SV=2	1	2	2	2	3.5	81.04
P11717	IGF2R	sp|P11717|MPRI_HUMAN Cation-independent mannose-6-phosphate receptor OS=Homo sapiens OX=9606 GN=IGF2R PE=1 SV=3	1	5	5	5	2.5	274.37		57436					53860
P11766	ADH5	sp|P11766|ADHX_HUMAN Alcohol dehydrogenase class-3 OS=Homo sapiens OX=9606 GN=ADH5 PE=1 SV=4	1	7	7	7	24.6	39.724
P12109	COL6A1	sp|P12109|CO6A1_HUMAN Collagen alpha-1(VI) chain OS=Homo sapiens OX=9606 GN=COL6A1 PE=1 SV=3	1	1	1	1	1.5	108.53
P12111	COL6A3	sp|P12111|CO6A3_HUMAN Collagen alpha-3(VI) chain OS=Homo sapiens OX=9606 GN=COL6A3 PE=1 SV=5	1	8	8	8	3.3	343.67	45831	44667	57141	43553	25104		57127	17278	32071		22129	37344			28398
P12259	F5	sp|P12259|FA5_HUMAN Coagulation factor V OS=Homo sapiens OX=9606 GN=F5 PE=1 SV=4	1	37	37	30	19.9	251.7	170210	50824	48926	74963	53404	90765	160320	140960	81632	76306	59963	62532	61985	79972	62888	55407
P12273	PIP	sp|P12273|PIP_HUMAN Prolactin-inducible protein OS=Homo sapiens OX=9606 GN=PIP PE=1 SV=1	1	5	5	5	50	16.572		23222	42540		29745	55100	15162
P12814;P35609	ACTN1	sp|P12814|ACTN1_HUMAN Alpha-actinin-1 OS=Homo sapiens OX=9606 GN=ACTN1 PE=1 SV=2	2	16	6	6	22.3	103.06
P12830	CDH1	sp|P12830|CADH1_HUMAN Cadherin-1 OS=Homo sapiens OX=9606 GN=CDH1 PE=1 SV=3	1	1	1	1	1.6	97.455
P12955	PEPD	sp|P12955|PEPD_HUMAN Xaa-Pro dipeptidase OS=Homo sapiens OX=9606 GN=PEPD PE=1 SV=3	1	7	7	7	23.7	54.548	10498	35582	10384		10526		8447.6	17557			6218.3					7401.1
P12956	XRCC6	sp|P12956|XRCC6_HUMAN X-ray repair cross-complementing protein 6 OS=Homo sapiens OX=9606 GN=XRCC6 PE=1 SV=2	1	9	9	9	19	69.842
P13010	XRCC5	sp|P13010|XRCC5_HUMAN X-ray repair cross-complementing protein 5 OS=Homo sapiens OX=9606 GN=XRCC5 PE=1 SV=3	1	3	3	3	5.1	82.704
Q01628;Q01629;P13164	IFITM3; IFITM2	sp|Q01628|IFM3_HUMAN Interferon-induced transmembrane protein 3 OS=Homo sapiens OX=9606 GN=IFITM3 PE=1 SV=2;sp|Q01629|IFM2_HUMAN Interferon-induced transmembrane protein 2 OS=Homo sapiens OX=9606 GN=IFITM2 PE=1 SV=2;sp|P13164|IFM1_HUMAN Interferon-induced	3	1	1	1	12	14.632
P13639;Q15029	EEF2	sp|P13639|EF2_HUMAN Elongation factor 2 OS=Homo sapiens OX=9606 GN=EEF2 PE=1 SV=4	2	18	18	18	24.7	95.337
P13671	C6	sp|P13671|CO6_HUMAN Complement component C6 OS=Homo sapiens OX=9606 GN=C6 PE=1 SV=3	1	26	26	26	36.2	104.79	393120	245270	362800	321820	339300	323120	418930	433610	308110	359960	388520	294290	346120	287410	315100	308440
P13716	ALAD	sp|P13716|HEM2_HUMAN Delta-aminolevulinic acid dehydratase OS=Homo sapiens OX=9606 GN=ALAD PE=1 SV=1	1	11	11	10	41.5	36.294		373110			27279
P13727	PRG2	sp|P13727|PRG2_HUMAN Bone marrow proteoglycan OS=Homo sapiens OX=9606 GN=PRG2 PE=1 SV=2	1	1	1	1	6.3	25.205
P13796;P13797;Q14651	LCP1	sp|P13796|PLSL_HUMAN Plastin-2 OS=Homo sapiens OX=9606 GN=LCP1 PE=1 SV=6	3	13	13	13	26	70.288	10187	94804	65111	9823.1	44944	27182		16690	25476	17551	11388	10924	16822			13671
P13804	ETFA	sp|P13804|ETFA_HUMAN Electron transfer flavoprotein subunit alpha, mitochondrial OS=Homo sapiens OX=9606 GN=ETFA PE=1 SV=1	1	1	1	1	5.4	35.079
P13929	ENO3	sp|P13929|ENOB_HUMAN Beta-enolase OS=Homo sapiens OX=9606 GN=ENO3 PE=1 SV=5	1	6	5	5	15	46.986
P14151	SELL	sp|P14151|LYAM1_HUMAN L-selectin OS=Homo sapiens OX=9606 GN=SELL PE=1 SV=2	1	4	4	4	12.1	42.187	32592	32542	33073	58934	109930	50011	33999	51566	88362	60704	84106	60209	76033	28476	19868	35659
P14550	AKR1A1	sp|P14550|AK1A1_HUMAN Aldo-keto reductase family 1 member A1 OS=Homo sapiens OX=9606 GN=AKR1A1 PE=1 SV=3	1	9	9	9	39.7	36.573
P14618	PKM	sp|P14618|KPYM_HUMAN Pyruvate kinase PKM OS=Homo sapiens OX=9606 GN=PKM PE=1 SV=4	1	18	17	17	47.5	57.936	53889	258630	13498	25415	24979	22915
P14625	HSP90B1	sp|P14625|ENPL_HUMAN Endoplasmin OS=Homo sapiens OX=9606 GN=HSP90B1 PE=1 SV=1	1	3	2	2	4.6	92.468
P14780	MMP9	sp|P14780|MMP9_HUMAN Matrix metalloproteinase-9 OS=Homo sapiens OX=9606 GN=MMP9 PE=1 SV=3	1	6	6	6	9.6	78.457
P14868	DARS1	sp|P14868|SYDC_HUMAN Aspartate--tRNA ligase, cytoplasmic OS=Homo sapiens OX=9606 GN=DARS1 PE=1 SV=2	1	7	7	7	16.2	57.136
P15104	GLUL	sp|P15104|GLNA_HUMAN Glutamine synthetase OS=Homo sapiens OX=9606 GN=GLUL PE=1 SV=4	1	7	7	7	22.3	42.064
P15144	ANPEP	sp|P15144|AMPN_HUMAN Aminopeptidase N OS=Homo sapiens OX=9606 GN=ANPEP PE=1 SV=4	1	13	13	13	14.6	109.54	48257	45382	58751	37226	46433	102700	30182	22227	52694		37182	11796	24505	18137	31350	15698
P63000;P15153;P60763;P84095;P17081;Q9H4E5	RAC1; RAC2	sp|P63000|RAC1_HUMAN Ras-related C3 botulinum toxin substrate 1 OS=Homo sapiens OX=9606 GN=RAC1 PE=1 SV=1;sp|P15153|RAC2_HUMAN Ras-related C3 botulinum toxin substrate 2 OS=Homo sapiens OX=9606 GN=RAC2 PE=1 SV=1;sp|P60763|RAC3_HUMAN Ras-related C3 botulinu	6	3	2	2	19.8	21.45
P15169;CON__Q2KJ83	CPN1	sp|P15169|CBPN_HUMAN Carboxypeptidase N catalytic chain OS=Homo sapiens OX=9606 GN=CPN1 PE=1 SV=1	2	12	12	12	35.8	52.286	260510	182540	250670	277190	209710	209010	248970	320490	258160	267740	255530	265040	280990	292670	306720	280550
P21281;P15313	ATP6V1B2; ATP6V1B1	sp|P21281|VATB2_HUMAN V-type proton ATPase subunit B, brain isoform OS=Homo sapiens OX=9606 GN=ATP6V1B2 PE=1 SV=3;sp|P15313|VATB1_HUMAN V-type proton ATPase subunit B, kidney isoform OS=Homo sapiens OX=9606 GN=ATP6V1B1 PE=1 SV=3	2	1	1	1	2.9	56.5
P15502	ELN	sp|P15502|ELN_HUMAN Elastin OS=Homo sapiens OX=9606 GN=ELN PE=1 SV=4	1	6	6	6	16.4	68.397
P15531	NME1	sp|P15531|NDKA_HUMAN Nucleoside diphosphate kinase A OS=Homo sapiens OX=9606 GN=NME1 PE=1 SV=1	1	3	3	2	29.6	17.149
P15735	PHKG2	sp|P15735|PHKG2_HUMAN Phosphorylase b kinase gamma catalytic chain, liver/testis isoform OS=Homo sapiens OX=9606 GN=PHKG2 PE=1 SV=1	1	1	1	1	4.2	46.442
P15814	IGLL1	sp|P15814|IGLL1_HUMAN Immunoglobulin lambda-like polypeptide 1 OS=Homo sapiens OX=9606 GN=IGLL1 PE=1 SV=1	1	3	3	3	23	22.963	302700	368140		860590	292360	258640	473470	380370	416070	416350		380810	652990	410830	377830	338270
P16070	CD44	sp|P16070|CD44_HUMAN CD44 antigen OS=Homo sapiens OX=9606 GN=CD44 PE=1 SV=3	1	2	2	2	3	81.537			20623	23201	23854	21136	20523	18514	20549	17855	23172	15528		15251	15513	15038
P16104;Q96QV6	H2AX; H2AC1	sp|P16104|H2AX_HUMAN Histone H2AX OS=Homo sapiens OX=9606 GN=H2AX PE=1 SV=2;sp|Q96QV6|H2A1A_HUMAN Histone H2A type 1-A OS=Homo sapiens OX=9606 GN=H2AC1 PE=1 SV=3	2	3	1	0	27.3	15.144
P16152;O75828	CBR1	sp|P16152|CBR1_HUMAN Carbonyl reductase [NADPH] 1 OS=Homo sapiens OX=9606 GN=CBR1 PE=1 SV=3	2	5	5	5	20.2	30.375
P16219	ACADS	sp|P16219|ACADS_HUMAN Short-chain specific acyl-CoA dehydrogenase, mitochondrial OS=Homo sapiens OX=9606 GN=ACADS PE=1 SV=1	1	4	4	4	12.9	44.297
P16930	FAH	sp|P16930|FAAA_HUMAN Fumarylacetoacetase OS=Homo sapiens OX=9606 GN=FAH PE=1 SV=2	1	8	8	8	23.6	46.374	66309	123380					11539
P17066;P48741	HSPA6; HSPA7	sp|P17066|HSP76_HUMAN Heat shock 70 kDa protein 6 OS=Homo sapiens OX=9606 GN=HSPA6 PE=1 SV=2;sp|P48741|HSP77_HUMAN Putative heat shock 70 kDa protein 7 OS=Homo sapiens OX=9606 GN=HSPA7 PE=5 SV=2	2	8	1	1	14.3	71.027
P17174	GOT1	sp|P17174|AATC_HUMAN Aspartate aminotransferase, cytoplasmic OS=Homo sapiens OX=9606 GN=GOT1 PE=1 SV=3	1	14	14	14	50.8	46.247		126910					873.46
P17516	AKR1C4	sp|P17516|AK1C4_HUMAN Aldo-keto reductase family 1 member C4 OS=Homo sapiens OX=9606 GN=AKR1C4 PE=1 SV=3	1	6	6	4	24.1	37.066
P17844;Q92841;O00571;O15523	DDX5; DDX17	sp|P17844|DDX5_HUMAN Probable ATP-dependent RNA helicase DDX5 OS=Homo sapiens OX=9606 GN=DDX5 PE=1 SV=1;sp|Q92841|DDX17_HUMAN Probable ATP-dependent RNA helicase DDX17 OS=Homo sapiens OX=9606 GN=DDX17 PE=1 SV=2;sp|O00571|DDX3X_HUMAN ATP-dependent RNA helic	4	2	2	2	3.9	69.147
P17858;Q01813;P08237	PFKL	sp|P17858|PFKAL_HUMAN ATP-dependent 6-phosphofructokinase, liver type OS=Homo sapiens OX=9606 GN=PFKL PE=1 SV=6	3	15	15	15	29.7	85.018	2153.3	221800		1100.2	2601.6	2163.4	3023.3		1837.6
P17936	IGFBP3	sp|P17936|IBP3_HUMAN Insulin-like growth factor-binding protein 3 OS=Homo sapiens OX=9606 GN=IGFBP3 PE=1 SV=2	1	9	9	9	38.1	31.674	130010	100930	70462	175230	128410	183050	159790	227740	124500	178490	240290	161380	196650	178870	191930	137930
P17980	PSMC3	sp|P17980|PRS6A_HUMAN 26S proteasome regulatory subunit 6A OS=Homo sapiens OX=9606 GN=PSMC3 PE=1 SV=3	1	8	8	8	28.9	49.203
P18124	RPL7	sp|P18124|RL7_HUMAN 60S ribosomal protein L7 OS=Homo sapiens OX=9606 GN=RPL7 PE=1 SV=1	1	1	1	1	7.3	29.225
P18206	VCL	sp|P18206|VINC_HUMAN Vinculin OS=Homo sapiens OX=9606 GN=VCL PE=1 SV=4	1	4	4	4	4.7	123.8	19019	21227
P18283	GPX2	sp|P18283|GPX2_HUMAN Glutathione peroxidase 2 OS=Homo sapiens OX=9606 GN=GPX2 PE=1 SV=3	1	1	1	1	7.4	21.954
P18428	LBP	sp|P18428|LBP_HUMAN Lipopolysaccharide-binding protein OS=Homo sapiens OX=9606 GN=LBP PE=1 SV=3	1	12	12	12	31	53.383	823310	140300	335600	190660	164190	261310	239950	134440	279580	238780	136260	160630	150180	135330	154170	98636
P18669;P15259;Q8N0Y7	PGAM1	sp|P18669|PGAM1_HUMAN Phosphoglycerate mutase 1 OS=Homo sapiens OX=9606 GN=PGAM1 PE=1 SV=2	3	5	5	5	27.2	28.804
P18827	SDC1	sp|P18827|SDC1_HUMAN Syndecan-1 OS=Homo sapiens OX=9606 GN=SDC1 PE=1 SV=3	1	1	1	1	5.5	32.461
P19320	VCAM1	sp|P19320|VCAM1_HUMAN Vascular cell adhesion protein 1 OS=Homo sapiens OX=9606 GN=VCAM1 PE=1 SV=1	1	5	5	5	9.3	81.275		12553	15547		22940	12369			26555
P19338	NCL	sp|P19338|NUCL_HUMAN Nucleolin OS=Homo sapiens OX=9606 GN=NCL PE=1 SV=3	1	3	3	3	6.3	76.613	53254	42432
P19652	ORM2	sp|P19652|A1AG2_HUMAN Alpha-1-acid glycoprotein 2 OS=Homo sapiens OX=9606 GN=ORM2 PE=1 SV=2	1	10	6	6	51.7	23.602	1463300	998470	2056800	1902400	2212400	1810500	1969500	1822000	1259400	2071100	2403300	2906900	1349900	1105600	1453200	1867000
P19823;CON__Q9TRI1	ITIH2	sp|P19823|ITIH2_HUMAN Inter-alpha-trypsin inhibitor heavy chain H2 OS=Homo sapiens OX=9606 GN=ITIH2 PE=1 SV=2	2	33	33	33	45.7	106.46	3203900	3173000	3275600	3762100	2766200	3529300	4127200	4466000	3486100	3756200	4567500	3494400	4265900	4208200	4272200	4319000
P19827;CON__Q0VCM5	ITIH1	sp|P19827|ITIH1_HUMAN Inter-alpha-trypsin inhibitor heavy chain H1 OS=Homo sapiens OX=9606 GN=ITIH1 PE=1 SV=3	2	34	34	34	49.4	101.39	3008300	2709000	3329300	3788600	2598500	3548100	4276800	4509500	3521900	3800100	4559700	3719000	4374100	4471400	4316800	4753600
P19971	TYMP	sp|P19971|TYPH_HUMAN Thymidine phosphorylase OS=Homo sapiens OX=9606 GN=TYMP PE=1 SV=2	1	5	5	5	13.7	49.955
P20160	AZU1	sp|P20160|CAP7_HUMAN Azurocidin OS=Homo sapiens OX=9606 GN=AZU1 PE=1 SV=3	1	4	4	4	16.3	26.885
P20618	PSMB1	sp|P20618|PSB1_HUMAN Proteasome subunit beta type-1 OS=Homo sapiens OX=9606 GN=PSMB1 PE=1 SV=2	1	7	7	7	43.6	26.489	487660	1455700	116230	90757	35637		46484	57105	88170	197680	61246
P20742	PZP	sp|P20742|PZP_HUMAN Pregnancy zone protein OS=Homo sapiens OX=9606 GN=PZP PE=1 SV=4	1	42	32	31	40.1	163.86	4222.1	137520	78117	252250	158620	37349	39801		79399		83576	470620	541870	166400	406270	194590
P20851	C4BPB	sp|P20851|C4BPB_HUMAN C4b-binding protein beta chain OS=Homo sapiens OX=9606 GN=C4BPB PE=1 SV=1	1	9	9	9	48.4	28.357	1038500	1285100	1178700	1274800	960690	1158600	1484600	1254900	1294200	1215100	1113800	1183800	1177000	1257400	1417000	1399700
P21291	CSRP1	sp|P21291|CSRP1_HUMAN Cysteine and glycine-rich protein 1 OS=Homo sapiens OX=9606 GN=CSRP1 PE=1 SV=3	1	1	1	1	8.8	20.567
P21399	ACO1	sp|P21399|ACOC_HUMAN Cytoplasmic aconitate hydratase OS=Homo sapiens OX=9606 GN=ACO1 PE=1 SV=3	1	12	12	12	19.8	98.398
P21549	AGXT	sp|P21549|SPYA_HUMAN Serine--pyruvate aminotransferase OS=Homo sapiens OX=9606 GN=AGXT PE=1 SV=1	1	3	3	3	10.5	43.009
P21695	GPD1	sp|P21695|GPDA_HUMAN Glycerol-3-phosphate dehydrogenase [NAD(+)], cytoplasmic OS=Homo sapiens OX=9606 GN=GPD1 PE=1 SV=4	1	10	10	10	42.4	37.567
P21810	BGN	sp|P21810|PGS1_HUMAN Biglycan OS=Homo sapiens OX=9606 GN=BGN PE=1 SV=2	1	1	1	1	3	41.654
P21964	COMT	sp|P21964|COMT_HUMAN Catechol O-methyltransferase OS=Homo sapiens OX=9606 GN=COMT PE=1 SV=2	1	2	2	2	14.8	30.037
P21980;P49221	TGM2	sp|P21980|TGM2_HUMAN Protein-glutamine gamma-glutamyltransferase 2 OS=Homo sapiens OX=9606 GN=TGM2 PE=1 SV=2	2	11	11	11	21.8	77.328		222890			3672.7
P22105;Q16473	TNXB; TNXA	sp|P22105|TENX_HUMAN Tenascin-X OS=Homo sapiens OX=9606 GN=TNXB PE=1 SV=5;sp|Q16473|TENXA_HUMAN Putative tenascin-XA OS=Homo sapiens OX=9606 GN=TNXA PE=5 SV=2	2	2	2	2	0.6	458.38
P22234	PAICS	sp|P22234|PUR6_HUMAN Multifunctional protein ADE2 OS=Homo sapiens OX=9606 GN=PAICS PE=1 SV=3	1	8	8	8	28	47.079
P22314	UBA1	sp|P22314|UBA1_HUMAN Ubiquitin-like modifier-activating enzyme 1 OS=Homo sapiens OX=9606 GN=UBA1 PE=1 SV=3	1	7	7	7	9.6	117.85		133150					172650	77164
P22352	GPX3	sp|P22352|GPX3_HUMAN Glutathione peroxidase 3 OS=Homo sapiens OX=9606 GN=GPX3 PE=1 SV=2	1	7	7	7	32.3	25.552	491610	287100	269580	392580	453800	267290	469520	468050	491470	423570	492260	361410	454640	369900	304680	453850
P22392;O60361	NME2; NME2P1	sp|P22392|NDKB_HUMAN Nucleoside diphosphate kinase B OS=Homo sapiens OX=9606 GN=NME2 PE=1 SV=1;sp|O60361|NDK8_HUMAN Putative nucleoside diphosphate kinase OS=Homo sapiens OX=9606 GN=NME2P1 PE=5 SV=1	2	2	1	1	20.4	17.298
P22626	HNRNPA2B1	sp|P22626|ROA2_HUMAN Heterogeneous nuclear ribonucleoproteins A2/B1 OS=Homo sapiens OX=9606 GN=HNRNPA2B1 PE=1 SV=2	1	2	2	2	8.5	37.429	11464	23646
P22692	IGFBP4	sp|P22692|IBP4_HUMAN Insulin-like growth factor-binding protein 4 OS=Homo sapiens OX=9606 GN=IGFBP4 PE=1 SV=2	1	2	2	2	12	27.934
P22792	CPN2	sp|P22792|CPN2_HUMAN Carboxypeptidase N subunit 2 OS=Homo sapiens OX=9606 GN=CPN2 PE=1 SV=3	1	14	14	14	32.5	60.556	673560	395910	493190	579860	412240	504020	539260	636800	556260	532250	551300	614570	580750	701380	695740	655200
P22891	PROZ	sp|P22891|PROZ_HUMAN Vitamin K-dependent protein Z OS=Homo sapiens OX=9606 GN=PROZ PE=1 SV=2	1	3	3	3	8.8	44.743	18370	21108		23982		27102	14139			23679	30831	25950	33467	23198		24884
P23083	IGHV1-2	sp|P23083|HV102_HUMAN Immunoglobulin heavy variable 1-2 OS=Homo sapiens OX=9606 GN=IGHV1-2 PE=1 SV=2	1	4	4	3	41	13.085	2778100	2993600	3581800	2391800	2047800	2049000	5327700	5239000	5539800	2808700	2234800	1392800	9151800	5687500	4150600	1677700
P23141;Q9UKY3	CES1	sp|P23141|EST1_HUMAN Liver carboxylesterase 1 OS=Homo sapiens OX=9606 GN=CES1 PE=1 SV=2	2	14	14	14	34	62.52		129550	53490	30226		14896
P23142;CON__ENSEMBL:ENSBTAP00000016046	FBLN1	sp|P23142|FBLN1_HUMAN Fibulin-1 OS=Homo sapiens OX=9606 GN=FBLN1 PE=1 SV=4	2	20	20	20	43.4	77.213	94816	221430	210070	189940	165680	128810	324240	185450	214510	180670	194480	133540	177230	174890	180850	208200
P23378	GLDC	sp|P23378|GCSP_HUMAN Glycine dehydrogenase (decarboxylating), mitochondrial OS=Homo sapiens OX=9606 GN=GLDC PE=1 SV=2	1	2	2	2	2.9	112.73
P23396	RPS3	sp|P23396|RS3_HUMAN 40S ribosomal protein S3 OS=Homo sapiens OX=9606 GN=RPS3 PE=1 SV=2	1	6	6	6	33.3	26.688
P23526	AHCY	sp|P23526|SAHH_HUMAN Adenosylhomocysteinase OS=Homo sapiens OX=9606 GN=AHCY PE=1 SV=4	1	9	9	9	26.2	47.716
P23528;Q9Y281	CFL1	sp|P23528|COF1_HUMAN Cofilin-1 OS=Homo sapiens OX=9606 GN=CFL1 PE=1 SV=3	2	3	3	3	30.7	18.502	45771	67502
P24158	PRTN3	sp|P24158|PRTN3_HUMAN Myeloblastin OS=Homo sapiens OX=9606 GN=PRTN3 PE=1 SV=3	1	1	1	1	4.7	27.807
P24298;Q8TD30	GPT	sp|P24298|ALAT1_HUMAN Alanine aminotransferase 1 OS=Homo sapiens OX=9606 GN=GPT PE=1 SV=3	2	11	11	11	30.8	54.636	49771	103670
P24534	EEF1B2	sp|P24534|EF1B_HUMAN Elongation factor 1-beta OS=Homo sapiens OX=9606 GN=EEF1B2 PE=1 SV=3	1	3	3	3	20.4	24.763
P24592	IGFBP6	sp|P24592|IBP6_HUMAN Insulin-like growth factor-binding protein 6 OS=Homo sapiens OX=9606 GN=IGFBP6 PE=1 SV=1	1	2	2	2	11.7	25.322		18594				16590
P24593	IGFBP5	sp|P24593|IBP5_HUMAN Insulin-like growth factor-binding protein 5 OS=Homo sapiens OX=9606 GN=IGFBP5 PE=1 SV=1	1	2	2	2	8.1	30.57
P24752	ACAT1	sp|P24752|THIL_HUMAN Acetyl-CoA acetyltransferase, mitochondrial OS=Homo sapiens OX=9606 GN=ACAT1 PE=1 SV=1	1	7	7	7	24.8	45.199
P24821	TNC	sp|P24821|TENA_HUMAN Tenascin OS=Homo sapiens OX=9606 GN=TNC PE=1 SV=3	1	18	18	18	13.4	240.85	33174	95268	11075		18721	25600			28878			5659.8
P25311	AZGP1	sp|P25311|ZA2G_HUMAN Zinc-alpha-2-glycoprotein OS=Homo sapiens OX=9606 GN=AZGP1 PE=1 SV=2	1	15	15	15	50.3	34.258	1113300	577360	1022300	991890	1290400	1652500	901090	1059300	726170	1032600	1509600	1256200	1174000	832560	1053200	1019400
P25786	PSMA1	sp|P25786|PSA1_HUMAN Proteasome subunit alpha type-1 OS=Homo sapiens OX=9606 GN=PSMA1 PE=1 SV=1	1	9	9	9	43.3	29.555	104480	445490	7666.9	9174.7			4827.1		18867
P25787	PSMA2	sp|P25787|PSA2_HUMAN Proteasome subunit alpha type-2 OS=Homo sapiens OX=9606 GN=PSMA2 PE=1 SV=2	1	6	6	6	42.7	25.898	53671	224070
P25788	PSMA3	sp|P25788|PSA3_HUMAN Proteasome subunit alpha type-3 OS=Homo sapiens OX=9606 GN=PSMA3 PE=1 SV=2	1	8	8	8	35.3	28.433	58817	440740	15094	10841				12791	17471
P25789	PSMA4	sp|P25789|PSA4_HUMAN Proteasome subunit alpha type-4 OS=Homo sapiens OX=9606 GN=PSMA4 PE=1 SV=1	1	6	6	6	32.2	29.483	129720	337610	31368	26023					19677
P26022	PTX3	sp|P26022|PTX3_HUMAN Pentraxin-related protein PTX3 OS=Homo sapiens OX=9606 GN=PTX3 PE=1 SV=3	1	12	12	12	37.8	41.975		1331900	43651	67351								70604	64868	61528
P26038;P15311;P35241	MSN; EZR; RDX	sp|P26038|MOES_HUMAN Moesin OS=Homo sapiens OX=9606 GN=MSN PE=1 SV=3;sp|P15311|EZRI_HUMAN Ezrin OS=Homo sapiens OX=9606 GN=EZR PE=1 SV=4;sp|P35241|RADI_HUMAN Radixin OS=Homo sapiens OX=9606 GN=RDX PE=1 SV=1	3	4	4	4	5.9	67.819
P26640	VARS1	sp|P26640|SYVC_HUMAN Valine--tRNA ligase OS=Homo sapiens OX=9606 GN=VARS1 PE=1 SV=4	1	5	5	5	5.5	140.47
P26641	EEF1G	sp|P26641|EF1G_HUMAN Elongation factor 1-gamma OS=Homo sapiens OX=9606 GN=EEF1G PE=1 SV=3	1	9	9	8	22.9	50.118
P26927;Q2TV78	MST1	sp|P26927|HGFL_HUMAN Hepatocyte growth factor-like protein OS=Homo sapiens OX=9606 GN=MST1 PE=1 SV=2	2	21	21	21	41.5	80.319	81635	53699	96963	91318	97643	115180	99716	90565	98715	119400	160140	115360	123510	111840	126750	132880
P27105	STOM	sp|P27105|STOM_HUMAN Stomatin OS=Homo sapiens OX=9606 GN=STOM PE=1 SV=3	1	2	2	2	10.8	31.73
P27169	PON1	sp|P27169|PON1_HUMAN Serum paraoxonase/arylesterase 1 OS=Homo sapiens OX=9606 GN=PON1 PE=1 SV=3	1	11	11	11	48.7	39.731	1016200	1833600	1160900	1559300	1220400	1587800	1111500	1095100	991980	1403700	1829800	1680600	1335700	1544700	1607300	1412800
P27348;P31947;Q04917	YWHAQ	sp|P27348|1433T_HUMAN 14-3-3 protein theta OS=Homo sapiens OX=9606 GN=YWHAQ PE=1 SV=1	3	3	2	2	13.9	27.764
P27487	DPP4	sp|P27487|DPP4_HUMAN Dipeptidyl peptidase 4 OS=Homo sapiens OX=9606 GN=DPP4 PE=1 SV=2	1	9	9	9	13.7	88.278	20122	20820	11681	26441	19172	21064	18297	18281	14864						17981
P27918	CFP	sp|P27918|PROP_HUMAN Properdin OS=Homo sapiens OX=9606 GN=CFP PE=1 SV=2	1	11	11	11	33.5	51.276	131310	172910	178750	226310	268190	318800	146460	299160	351020	224000	316170	197260	280510	229530	315100	241220
P28062	PSMB8	sp|P28062|PSB8_HUMAN Proteasome subunit beta type-8 OS=Homo sapiens OX=9606 GN=PSMB8 PE=1 SV=3	1	6	6	6	27.2	30.354	58681	212240		13463					18218
P28065	PSMB9	sp|P28065|PSB9_HUMAN Proteasome subunit beta type-9 OS=Homo sapiens OX=9606 GN=PSMB9 PE=1 SV=2	1	5	5	5	32	23.264	8493.9	139340							9057.2
P28066	PSMA5	sp|P28066|PSA5_HUMAN Proteasome subunit alpha type-5 OS=Homo sapiens OX=9606 GN=PSMA5 PE=1 SV=3	1	9	9	9	57.7	26.411	154000	435160	36776	31734	11888	3677	14406	9586.9	29990
P28070	PSMB4	sp|P28070|PSB4_HUMAN Proteasome subunit beta type-4 OS=Homo sapiens OX=9606 GN=PSMB4 PE=1 SV=4	1	6	6	6	36.4	29.204	122070	317080		27655					27535
P28072	PSMB6	sp|P28072|PSB6_HUMAN Proteasome subunit beta type-6 OS=Homo sapiens OX=9606 GN=PSMB6 PE=1 SV=4	1	3	3	3	11.3	25.357	84571	150550
P28074	PSMB5	sp|P28074|PSB5_HUMAN Proteasome subunit beta type-5 OS=Homo sapiens OX=9606 GN=PSMB5 PE=1 SV=3	1	9	9	9	41.8	28.48	89146	135750	15254	13051	10260		8303.4	11072	15052
P28332	ADH6	sp|P28332|ADH6_HUMAN Alcohol dehydrogenase 6 OS=Homo sapiens OX=9606 GN=ADH6 PE=1 SV=3	1	14	14	14	50	39.072
P28838	LAP3	sp|P28838|AMPL_HUMAN Cytosol aminopeptidase OS=Homo sapiens OX=9606 GN=LAP3 PE=1 SV=3	1	15	15	15	40.8	56.166	2690.2	170410														4779.1
P29144	TPP2	sp|P29144|TPP2_HUMAN Tripeptidyl-peptidase 2 OS=Homo sapiens OX=9606 GN=TPP2 PE=1 SV=4	1	10	10	10	13.5	138.35
P29401	TKT	sp|P29401|TKT_HUMAN Transketolase OS=Homo sapiens OX=9606 GN=TKT PE=1 SV=3	1	8	8	8	19.7	67.877		158780			17586	24401
P29508;P48594	SERPINB3	sp|P29508|SPB3_HUMAN Serpin B3 OS=Homo sapiens OX=9606 GN=SERPINB3 PE=1 SV=2	2	4	4	4	13.1	44.564
P29622	SERPINA4	sp|P29622|KAIN_HUMAN Kallistatin OS=Homo sapiens OX=9606 GN=SERPINA4 PE=1 SV=3	1	18	18	18	53.4	48.541	238600	189920	186550	301870	397300	414890	321990	329530	242460	356690	529520	346660	468990	441850	386470	355940
P29692	EEF1D	sp|P29692|EF1D_HUMAN Elongation factor 1-delta OS=Homo sapiens OX=9606 GN=EEF1D PE=1 SV=5	1	5	5	5	24.9	31.121
P30038	ALDH4A1	sp|P30038|AL4A1_HUMAN Delta-1-pyrroline-5-carboxylate dehydrogenase, mitochondrial OS=Homo sapiens OX=9606 GN=ALDH4A1 PE=1 SV=3	1	2	2	2	5.7	61.719
P30039	PBLD	sp|P30039|PBLD_HUMAN Phenazine biosynthesis-like domain-containing protein OS=Homo sapiens OX=9606 GN=PBLD PE=1 SV=2	1	11	11	11	54.2	31.785
P30041	PRDX6	sp|P30041|PRDX6_HUMAN Peroxiredoxin-6 OS=Homo sapiens OX=9606 GN=PRDX6 PE=1 SV=3	1	10	10	10	53.1	25.035	8316.1	218780			10606
P30043	BLVRB	sp|P30043|BLVRB_HUMAN Flavin reductase (NADPH) OS=Homo sapiens OX=9606 GN=BLVRB PE=1 SV=3	1	5	5	5	36.4	22.119		159010			19730
P30044	PRDX5	sp|P30044|PRDX5_HUMAN Peroxiredoxin-5, mitochondrial OS=Homo sapiens OX=9606 GN=PRDX5 PE=1 SV=4	1	1	1	1	7.9	22.086
P30046;A6NHG4	DDT; DDTL	sp|P30046|DOPD_HUMAN D-dopachrome decarboxylase OS=Homo sapiens OX=9606 GN=DDT PE=1 SV=3;sp|A6NHG4|DDTL_HUMAN D-dopachrome decarboxylase-like protein OS=Homo sapiens OX=9606 GN=DDTL PE=2 SV=1	2	3	3	3	30.5	12.712
P30048	PRDX3	sp|P30048|PRDX3_HUMAN Thioredoxin-dependent peroxide reductase, mitochondrial OS=Homo sapiens OX=9606 GN=PRDX3 PE=1 SV=3	1	2	2	2	9.8	27.692
P30050	RPL12	sp|P30050|RL12_HUMAN 60S ribosomal protein L12 OS=Homo sapiens OX=9606 GN=RPL12 PE=1 SV=1	1	5	5	5	44.8	17.818
P30084	ECHS1	sp|P30084|ECHM_HUMAN Enoyl-CoA hydratase, mitochondrial OS=Homo sapiens OX=9606 GN=ECHS1 PE=1 SV=4	1	3	3	3	14.8	31.387
P30086	PEBP1	sp|P30086|PEBP1_HUMAN Phosphatidylethanolamine-binding protein 1 OS=Homo sapiens OX=9606 GN=PEBP1 PE=1 SV=3	1	9	9	9	68.4	21.057
P30101	PDIA3	sp|P30101|PDIA3_HUMAN Protein disulfide-isomerase A3 OS=Homo sapiens OX=9606 GN=PDIA3 PE=1 SV=4	1	1	1	1	2.2	56.782
P30153	PPP2R1A	sp|P30153|2AAA_HUMAN Serine/threonine-protein phosphatase 2A 65 kDa regulatory subunit A alpha isoform OS=Homo sapiens OX=9606 GN=PPP2R1A PE=1 SV=4	1	2	2	2	5.1	65.308
P30613	PKLR	sp|P30613|KPYR_HUMAN Pyruvate kinase PKLR OS=Homo sapiens OX=9606 GN=PKLR PE=1 SV=2	1	19	19	18	44.8	61.829
P31146	CORO1A	sp|P31146|COR1A_HUMAN Coronin-1A OS=Homo sapiens OX=9606 GN=CORO1A PE=1 SV=4	1	4	4	4	10.4	51.026		100630				41417
P31327;P27708	CPS1	sp|P31327|CPSM_HUMAN Carbamoyl-phosphate synthase [ammonia], mitochondrial OS=Homo sapiens OX=9606 GN=CPS1 PE=1 SV=2	2	58	58	58	50.4	164.94	1034.5	1051400		1473.8			797.42			1200.5	728.4	1541.9				670.67
P31689	DNAJA1	sp|P31689|DNJA1_HUMAN DnaJ homolog subfamily A member 1 OS=Homo sapiens OX=9606 GN=DNAJA1 PE=1 SV=2	1	3	3	3	11.8	44.868
P31939	ATIC	sp|P31939|PUR9_HUMAN Bifunctional purine biosynthesis protein ATIC OS=Homo sapiens OX=9606 GN=ATIC PE=1 SV=3	1	3	3	3	7.3	64.615
P31944	CASP14	sp|P31944|CASPE_HUMAN Caspase-14 OS=Homo sapiens OX=9606 GN=CASP14 PE=1 SV=2	1	2	2	2	9.5	27.679
P31946	YWHAB	sp|P31946|1433B_HUMAN 14-3-3 protein beta/alpha OS=Homo sapiens OX=9606 GN=YWHAB PE=1 SV=3	1	3	2	2	16.3	28.082		34696						33444
P31949	S100A11	sp|P31949|S10AB_HUMAN Protein S100-A11 OS=Homo sapiens OX=9606 GN=S100A11 PE=1 SV=2	1	1	1	1	15.2	11.74
P32119	PRDX2	sp|P32119|PRDX2_HUMAN Peroxiredoxin-2 OS=Homo sapiens OX=9606 GN=PRDX2 PE=1 SV=5	1	3	2	2	14.6	21.892	84532	161460	44728		161750					19748		68273	23373		22532
P32189;Q14409	GK; GK3P	sp|P32189|GLPK_HUMAN Glycerol kinase OS=Homo sapiens OX=9606 GN=GK PE=1 SV=3;sp|Q14409|GLPK3_HUMAN Glycerol kinase 3 OS=Homo sapiens OX=9606 GN=GK3P PE=2 SV=2	2	2	2	2	3.6	61.244
P32320	CDA	sp|P32320|CDD_HUMAN Cytidine deaminase OS=Homo sapiens OX=9606 GN=CDA PE=1 SV=2	1	1	1	1	11.6	16.185
P32754	HPD	sp|P32754|HPPD_HUMAN 4-hydroxyphenylpyruvate dioxygenase OS=Homo sapiens OX=9606 GN=HPD PE=1 SV=2	1	11	11	11	36.9	44.934	1679.5	162590
P32929	CTH	sp|P32929|CGL_HUMAN Cystathionine gamma-lyase OS=Homo sapiens OX=9606 GN=CTH PE=1 SV=3	1	7	7	7	24.2	44.508
P33121;Q9ULC5	ACSL1	sp|P33121|ACSL1_HUMAN Long-chain-fatty-acid--CoA ligase 1 OS=Homo sapiens OX=9606 GN=ACSL1 PE=1 SV=1	2	17	17	17	31.7	77.942
P33151	CDH5	sp|P33151|CADH5_HUMAN Cadherin-5 OS=Homo sapiens OX=9606 GN=CDH5 PE=1 SV=5	1	6	6	6	10.2	87.527			64320	89534	25619		103630	92762			72409		147160	79408	52120	60406
P33908	MAN1A1	sp|P33908|MA1A1_HUMAN Mannosyl-oligosaccharide 1,2-alpha-mannosidase IA OS=Homo sapiens OX=9606 GN=MAN1A1 PE=1 SV=3	1	1	1	1	2.3	72.968
P34096	RNASE4	sp|P34096|RNAS4_HUMAN Ribonuclease 4 OS=Homo sapiens OX=9606 GN=RNASE4 PE=1 SV=3	1	3	3	3	21.8	16.84	18758	17511				12179						12325
P34896	SHMT1	sp|P34896|GLYC_HUMAN Serine hydroxymethyltransferase, cytosolic OS=Homo sapiens OX=9606 GN=SHMT1 PE=1 SV=1	1	17	17	16	43.5	53.082
P34897	SHMT2	sp|P34897|GLYM_HUMAN Serine hydroxymethyltransferase, mitochondrial OS=Homo sapiens OX=9606 GN=SHMT2 PE=1 SV=3	1	2	1	1	6.9	55.992
P34913	EPHX2	sp|P34913|HYES_HUMAN Bifunctional epoxide hydrolase 2 OS=Homo sapiens OX=9606 GN=EPHX2 PE=1 SV=2	1	4	4	4	11.4	62.615
P34932	HSPA4	sp|P34932|HSP74_HUMAN Heat shock 70 kDa protein 4 OS=Homo sapiens OX=9606 GN=HSPA4 PE=1 SV=4	1	3	2	2	5	94.33
P35030	PRSS3	sp|P35030|TRY3_HUMAN Trypsin-3 OS=Homo sapiens OX=9606 GN=PRSS3 PE=1 SV=2	1	1	1	1	4.3	32.528
P35270	SPR	sp|P35270|SPRE_HUMAN Sepiapterin reductase OS=Homo sapiens OX=9606 GN=SPR PE=1 SV=1	1	3	3	3	16.5	28.048
P35443	THBS4	sp|P35443|TSP4_HUMAN Thrombospondin-4 OS=Homo sapiens OX=9606 GN=THBS4 PE=1 SV=2	1	4	3	3	6.2	105.87		31706				9245.4			5578.4
P35542	SAA4	sp|P35542|SAA4_HUMAN Serum amyloid A-4 protein OS=Homo sapiens OX=9606 GN=SAA4 PE=1 SV=2	1	4	4	4	33.1	14.746	1855700	709280	1864500	1157100	1141400	1246400	1082800	1051800	813510	771470	1484300	1407000	816290	935130	696510	946840
P35558	PCK1	sp|P35558|PCKGC_HUMAN Phosphoenolpyruvate carboxykinase, cytosolic [GTP] OS=Homo sapiens OX=9606 GN=PCK1 PE=1 SV=3	1	2	1	1	5	69.194
P35573	AGL	sp|P35573|GDE_HUMAN Glycogen debranching enzyme OS=Homo sapiens OX=9606 GN=AGL PE=1 SV=3	1	42	42	42	37.3	174.76		304320											14553			12503
P35579;P35580;P35749;Q7Z406	MYH9	sp|P35579|MYH9_HUMAN Myosin-9 OS=Homo sapiens OX=9606 GN=MYH9 PE=1 SV=4	4	20	20	20	14.3	226.53
P35606	COPB2	sp|P35606|COPB2_HUMAN Coatomer subunit beta OS=Homo sapiens OX=9606 GN=COPB2 PE=1 SV=2	1	2	2	2	2.2	102.49
P35858	IGFALS	sp|P35858|ALS_HUMAN Insulin-like growth factor-binding protein complex acid labile subunit OS=Homo sapiens OX=9606 GN=IGFALS PE=1 SV=1	1	21	21	21	44.6	66.034	219890	207330	129970	319540	288700	304340	251360	349850	204120	314410	384070	301450	332630	359700	339390	269930
P35914	HMGCL	sp|P35914|HMGCL_HUMAN Hydroxymethylglutaryl-CoA lyase, mitochondrial OS=Homo sapiens OX=9606 GN=HMGCL PE=1 SV=2	1	1	1	1	4.3	34.36
P35998	PSMC2	sp|P35998|PRS7_HUMAN 26S proteasome regulatory subunit 7 OS=Homo sapiens OX=9606 GN=PSMC2 PE=1 SV=3	1	6	6	6	20.3	48.633
P36406	TRIM23	sp|P36406|TRI23_HUMAN E3 ubiquitin-protein ligase TRIM23 OS=Homo sapiens OX=9606 GN=TRIM23 PE=1 SV=1	1	1	1	1	1.7	64.066
P36871	PGM1	sp|P36871|PGM1_HUMAN Phosphoglucomutase-1 OS=Homo sapiens OX=9606 GN=PGM1 PE=1 SV=3	1	10	10	10	25.3	61.448
P36955;CON__Q95121	SERPINF1	sp|P36955|PEDF_HUMAN Pigment epithelium-derived factor OS=Homo sapiens OX=9606 GN=SERPINF1 PE=1 SV=4	2	16	16	16	46.4	46.312	362470	204830	295380	347090	329220	614280	316740	377640	316480	346380	466010	430730	399850	321730	403110	313280
P36957	DLST	sp|P36957|ODO2_HUMAN Dihydrolipoyllysine-residue succinyltransferase component of 2-oxoglutarate dehydrogenase complex, mitochondrial OS=Homo sapiens OX=9606 GN=DLST PE=1 SV=4	1	4	4	4	12.8	48.755
P36980	CFHR2	sp|P36980|FHR2_HUMAN Complement factor H-related protein 2 OS=Homo sapiens OX=9606 GN=CFHR2 PE=1 SV=1	1	6	2	2	31.9	30.65	159080		143660				28905	45313		31266	65630	42487		82707	38277
P37108	SRP14	sp|P37108|SRP14_HUMAN Signal recognition particle 14 kDa protein OS=Homo sapiens OX=9606 GN=SRP14 PE=1 SV=2	1	1	1	1	10.3	14.57
P37837	TALDO1	sp|P37837|TALDO_HUMAN Transaldolase OS=Homo sapiens OX=9606 GN=TALDO1 PE=1 SV=2	1	3	3	3	10.7	37.54
P38117	ETFB	sp|P38117|ETFB_HUMAN Electron transfer flavoprotein subunit beta OS=Homo sapiens OX=9606 GN=ETFB PE=1 SV=3	1	1	1	1	6.7	27.843
P38606	ATP6V1A	sp|P38606|VATA_HUMAN V-type proton ATPase catalytic subunit A OS=Homo sapiens OX=9606 GN=ATP6V1A PE=1 SV=2	1	3	3	3	6.6	68.303
P39060	COL18A1	sp|P39060|COIA1_HUMAN Collagen alpha-1(XVIII) chain OS=Homo sapiens OX=9606 GN=COL18A1 PE=1 SV=5	1	3	3	3	2.6	178.19
P40261	NNMT	sp|P40261|NNMT_HUMAN Nicotinamide N-methyltransferase OS=Homo sapiens OX=9606 GN=NNMT PE=1 SV=1	1	4	4	4	17	29.574
P40306	PSMB10	sp|P40306|PSB10_HUMAN Proteasome subunit beta type-10 OS=Homo sapiens OX=9606 GN=PSMB10 PE=1 SV=1	1	2	2	2	9.9	28.936
P40925	MDH1	sp|P40925|MDHC_HUMAN Malate dehydrogenase, cytoplasmic OS=Homo sapiens OX=9606 GN=MDH1 PE=1 SV=4	1	7	7	7	28.4	36.426
P40926	MDH2	sp|P40926|MDHM_HUMAN Malate dehydrogenase, mitochondrial OS=Homo sapiens OX=9606 GN=MDH2 PE=1 SV=3	1	6	6	6	27.2	35.503
P41222	PTGDS	sp|P41222|PTGDS_HUMAN Prostaglandin-H2 D-isomerase OS=Homo sapiens OX=9606 GN=PTGDS PE=1 SV=1	1	2	2	2	17.4	21.029		61661				95146					53579			18717
P42126	ECI1	sp|P42126|ECI1_HUMAN Enoyl-CoA delta isomerase 1, mitochondrial OS=Homo sapiens OX=9606 GN=ECI1 PE=1 SV=1	1	2	2	2	9.3	32.816
P42357	HAL	sp|P42357|HUTH_HUMAN Histidine ammonia-lyase OS=Homo sapiens OX=9606 GN=HAL PE=1 SV=1	1	3	3	3	4.7	72.697
P42765	ACAA2	sp|P42765|THIM_HUMAN 3-ketoacyl-CoA thiolase, mitochondrial OS=Homo sapiens OX=9606 GN=ACAA2 PE=1 SV=2	1	8	8	8	28	41.924
P43251	BTD	sp|P43251|BTD_HUMAN Biotinidase OS=Homo sapiens OX=9606 GN=BTD PE=1 SV=2	1	8	8	8	18	61.132	110310	75334	70888	109980	110520	106250	104450	89068	82825	97168	177860	97966	107960	111950	88056	110510
P43490	NAMPT	sp|P43490|NAMPT_HUMAN Nicotinamide phosphoribosyltransferase OS=Homo sapiens OX=9606 GN=NAMPT PE=1 SV=1	1	4	4	4	14.7	55.52
P43652;CON__REFSEQ:XP_585019	AFM	sp|P43652|AFAM_HUMAN Afamin OS=Homo sapiens OX=9606 GN=AFM PE=1 SV=1	2	28	28	28	50.4	69.068	1186600	1266700	506690	623800	734170	1044700	880950	645630	661020	701890	1116300	754580	816300	897010	1221400	736260
P43686	PSMC4	sp|P43686|PRS6B_HUMAN 26S proteasome regulatory subunit 6B OS=Homo sapiens OX=9606 GN=PSMC4 PE=1 SV=2	1	5	5	5	16.3	47.366
P45954	ACADSB	sp|P45954|ACDSB_HUMAN Short/branched chain specific acyl-CoA dehydrogenase, mitochondrial OS=Homo sapiens OX=9606 GN=ACADSB PE=1 SV=1	1	5	5	5	15.5	47.485
P46777	RPL5	sp|P46777|RL5_HUMAN 60S ribosomal protein L5 OS=Homo sapiens OX=9606 GN=RPL5 PE=1 SV=3	1	4	4	4	18.5	34.362
P46782	RPS5	sp|P46782|RS5_HUMAN 40S ribosomal protein S5 OS=Homo sapiens OX=9606 GN=RPS5 PE=1 SV=4	1	1	1	1	7.4	22.876
P46952	HAAO	sp|P46952|3HAO_HUMAN 3-hydroxyanthranilate 3,4-dioxygenase OS=Homo sapiens OX=9606 GN=HAAO PE=1 SV=2	1	3	3	3	8.7	32.556
P47756	CAPZB	sp|P47756|CAPZB_HUMAN F-actin-capping protein subunit beta OS=Homo sapiens OX=9606 GN=CAPZB PE=1 SV=4	1	3	3	3	11.2	31.35
P47929	LGALS7	sp|P47929|LEG7_HUMAN Galectin-7 OS=Homo sapiens OX=9606 GN=LGALS7 PE=1 SV=2	1	1	1	1	8.8	15.075
P47989	XDH	sp|P47989|XDH_HUMAN Xanthine dehydrogenase/oxidase OS=Homo sapiens OX=9606 GN=XDH PE=1 SV=4	1	9	8	8	9.2	146.42
P48444	ARCN1	sp|P48444|COPD_HUMAN Coatomer subunit delta OS=Homo sapiens OX=9606 GN=ARCN1 PE=1 SV=1	1	6	6	6	11.4	57.21
P48556	PSMD8	sp|P48556|PSMD8_HUMAN 26S proteasome non-ATPase regulatory subunit 8 OS=Homo sapiens OX=9606 GN=PSMD8 PE=1 SV=2	1	4	4	4	14	39.611
P48735	IDH2	sp|P48735|IDHP_HUMAN Isocitrate dehydrogenase [NADP], mitochondrial OS=Homo sapiens OX=9606 GN=IDH2 PE=1 SV=2	1	7	6	6	19	50.909		97234		11923									11935
P48740	MASP1	sp|P48740|MASP1_HUMAN Mannan-binding lectin serine protease 1 OS=Homo sapiens OX=9606 GN=MASP1 PE=1 SV=3	1	18	17	17	34.3	79.246	76065	101630	132540	124370	124470	150980	156040	292820	178420	187380	130900	114530	130600	171310	238480	197370
P49189	ALDH9A1	sp|P49189|AL9A1_HUMAN 4-trimethylaminobutyraldehyde dehydrogenase OS=Homo sapiens OX=9606 GN=ALDH9A1 PE=1 SV=3	1	11	11	11	26.9	53.801	25801	276480
P49257	LMAN1	sp|P49257|LMAN1_HUMAN Protein ERGIC-53 OS=Homo sapiens OX=9606 GN=LMAN1 PE=1 SV=2	1	2	2	2	6.9	57.548
P49327	FASN	sp|P49327|FAS_HUMAN Fatty acid synthase OS=Homo sapiens OX=9606 GN=FASN PE=1 SV=3	1	78	78	78	43.9	273.42		456880		205.79	98.617					200.97			284.28
P49411	TUFM	sp|P49411|EFTU_HUMAN Elongation factor Tu, mitochondrial OS=Homo sapiens OX=9606 GN=TUFM PE=1 SV=2	1	1	1	1	4.2	49.541
P49419	ALDH7A1	sp|P49419|AL7A1_HUMAN Alpha-aminoadipic semialdehyde dehydrogenase OS=Homo sapiens OX=9606 GN=ALDH7A1 PE=1 SV=5	1	7	7	7	18.4	58.486
P49588	AARS1	sp|P49588|SYAC_HUMAN Alanine--tRNA ligase, cytoplasmic OS=Homo sapiens OX=9606 GN=AARS1 PE=1 SV=2	1	3	3	3	4.3	106.81
P49591	SARS1	sp|P49591|SYSC_HUMAN Serine--tRNA ligase, cytoplasmic OS=Homo sapiens OX=9606 GN=SARS1 PE=1 SV=3	1	6	6	6	14	58.777
P49720	PSMB3	sp|P49720|PSB3_HUMAN Proteasome subunit beta type-3 OS=Homo sapiens OX=9606 GN=PSMB3 PE=1 SV=2	1	5	5	5	35.1	22.949	99473	292590	25771	30303					32748
P49721	PSMB2	sp|P49721|PSB2_HUMAN Proteasome subunit beta type-2 OS=Homo sapiens OX=9606 GN=PSMB2 PE=1 SV=1	1	7	7	7	41.3	22.836	301430	711530	53118	89775	68066		24139	65483	82341		36914
P49747;CON__ENSEMBL:ENSBTAP00000006074	COMP	sp|P49747|COMP_HUMAN Cartilage oligomeric matrix protein OS=Homo sapiens OX=9606 GN=COMP PE=1 SV=2	2	6	6	5	13.7	82.86		48597	34796		38804	58590	80182	21072	27093		17729			29259	48369	25741
P49773	HINT1	sp|P49773|HINT1_HUMAN Histidine triad nucleotide-binding protein 1 OS=Homo sapiens OX=9606 GN=HINT1 PE=1 SV=2	1	1	1	1	19	13.802
P49908	SELENOP	sp|P49908|SEPP1_HUMAN Selenoprotein P OS=Homo sapiens OX=9606 GN=SELENOP PE=1 SV=3	1	4	4	4	10.2	43.173	129180	202150	94539	150840	97216	178200	123370	126430	232890	262060	307630	187350	180610	203240	213310	195720
P49913	CAMP	sp|P49913|CAMP_HUMAN Cathelicidin antimicrobial peptide OS=Homo sapiens OX=9606 GN=CAMP PE=1 SV=1	1	4	4	4	19.4	19.301		17052	12297		7515.3	16954						12338				7012.7
P50053	KHK	sp|P50053|KHK_HUMAN Ketohexokinase OS=Homo sapiens OX=9606 GN=KHK PE=1 SV=2	1	7	7	7	25.8	32.523
P50225;P0DMM9;P0DMN0;O75897	SULT1A1; SULT1A3; SULT1A4	sp|P50225|ST1A1_HUMAN Sulfotransferase 1A1 OS=Homo sapiens OX=9606 GN=SULT1A1 PE=1 SV=3;sp|P0DMM9|ST1A3_HUMAN Sulfotransferase 1A3 OS=Homo sapiens OX=9606 GN=SULT1A3 PE=1 SV=1;sp|P0DMN0|ST1A4_HUMAN Sulfotransferase 1A4 OS=Homo sapiens OX=9606 GN=SULT1A4 PE	4	10	10	2	36.6	34.165	4522.1	499050			4469.3	2910.4		5259.7				4213.6
P50226	SULT1A2	sp|P50226|ST1A2_HUMAN Sulfotransferase 1A2 OS=Homo sapiens OX=9606 GN=SULT1A2 PE=1 SV=2	1	10	2	2	39	34.309
P50395;P31150	GDI2	sp|P50395|GDIB_HUMAN Rab GDP dissociation inhibitor beta OS=Homo sapiens OX=9606 GN=GDI2 PE=1 SV=2	2	6	6	6	20.4	50.663
P50440	GATM	sp|P50440|GATM_HUMAN Glycine amidinotransferase, mitochondrial OS=Homo sapiens OX=9606 GN=GATM PE=1 SV=1	1	6	6	6	18.2	48.455
P50991	CCT4	sp|P50991|TCPD_HUMAN T-complex protein 1 subunit delta OS=Homo sapiens OX=9606 GN=CCT4 PE=1 SV=4	1	1	1	1	2.4	57.924
P51149	RAB7A	sp|P51149|RAB7A_HUMAN Ras-related protein Rab-7a OS=Homo sapiens OX=9606 GN=RAB7A PE=1 SV=1	1	3	3	3	17.9	23.489
P51451	BLK	sp|P51451|BLK_HUMAN Tyrosine-protein kinase Blk OS=Homo sapiens OX=9606 GN=BLK PE=1 SV=3	1	1	1	1	4.2	57.706
P51570	GALK1	sp|P51570|GALK1_HUMAN Galactokinase OS=Homo sapiens OX=9606 GN=GALK1 PE=1 SV=1	1	11	11	11	39	42.272		243840		2795.3								2781
P51648	ALDH3A2	sp|P51648|AL3A2_HUMAN Aldehyde dehydrogenase family 3 member A2 OS=Homo sapiens OX=9606 GN=ALDH3A2 PE=1 SV=1	1	2	2	2	6.4	54.847
P51649	ALDH5A1	sp|P51649|SSDH_HUMAN Succinate-semialdehyde dehydrogenase, mitochondrial OS=Homo sapiens OX=9606 GN=ALDH5A1 PE=1 SV=2	1	2	2	2	5	57.214
P51665	PSMD7	sp|P51665|PSMD7_HUMAN 26S proteasome non-ATPase regulatory subunit 7 OS=Homo sapiens OX=9606 GN=PSMD7 PE=1 SV=2	1	1	1	1	3.7	37.025
P51884;CON__Q05443	LUM	sp|P51884|LUM_HUMAN Lumican OS=Homo sapiens OX=9606 GN=LUM PE=1 SV=2	2	10	10	10	35.2	38.429	109210	209840	115790	457670	247080	319850	255110	200820	276710	362990	559450	312900	272950	334270	367550	324760
P52209	PGD	sp|P52209|6PGD_HUMAN 6-phosphogluconate dehydrogenase, decarboxylating OS=Homo sapiens OX=9606 GN=PGD PE=1 SV=3	1	5	5	5	15.3	53.139		32445				10367
P52756	RBM5	sp|P52756|RBM5_HUMAN RNA-binding protein 5 OS=Homo sapiens OX=9606 GN=RBM5 PE=1 SV=2	1	1	1	1	0.9	92.153
P52758	RIDA	sp|P52758|RIDA_HUMAN 2-iminobutanoate/2-iminopropanoate deaminase OS=Homo sapiens OX=9606 GN=RIDA PE=1 SV=1	1	4	4	4	40.9	14.494
P52907;P47755	CAPZA1; CAPZA2	sp|P52907|CAZA1_HUMAN F-actin-capping protein subunit alpha-1 OS=Homo sapiens OX=9606 GN=CAPZA1 PE=1 SV=3;sp|P47755|CAZA2_HUMAN F-actin-capping protein subunit alpha-2 OS=Homo sapiens OX=9606 GN=CAPZA2 PE=1 SV=3	2	2	2	2	11.5	32.922
P53396	ACLY	sp|P53396|ACLY_HUMAN ATP-citrate synthase OS=Homo sapiens OX=9606 GN=ACLY PE=1 SV=3	1	5	5	5	5.8	120.84
P53618	COPB1	sp|P53618|COPB_HUMAN Coatomer subunit beta OS=Homo sapiens OX=9606 GN=COPB1 PE=1 SV=3	1	11	11	11	16.1	107.14		82990									39804
P53621	COPA	sp|P53621|COPA_HUMAN Coatomer subunit alpha OS=Homo sapiens OX=9606 GN=COPA PE=1 SV=2	1	16	16	16	17.2	138.34
P53999	SUB1	sp|P53999|TCP4_HUMAN Activated RNA polymerase II transcriptional coactivator p15 OS=Homo sapiens OX=9606 GN=SUB1 PE=1 SV=3	1	2	2	2	18.9	14.395
P54108	CRISP3	sp|P54108|CRIS3_HUMAN Cysteine-rich secretory protein 3 OS=Homo sapiens OX=9606 GN=CRISP3 PE=1 SV=1	1	3	3	3	13.5	27.63	50417	59678	59934	51664	75288	21219	48403	47835	56073	66863	36376	53982		19483	29075	23818
P54840	GYS2	sp|P54840|GYS2_HUMAN Glycogen [starch] synthase, liver OS=Homo sapiens OX=9606 GN=GYS2 PE=1 SV=2	1	4	4	4	8	80.988
P54868	HMGCS2	sp|P54868|HMCS2_HUMAN Hydroxymethylglutaryl-CoA synthase, mitochondrial OS=Homo sapiens OX=9606 GN=HMGCS2 PE=1 SV=1	1	4	4	4	12.8	56.635
P55036	PSMD4	sp|P55036|PSMD4_HUMAN 26S proteasome non-ATPase regulatory subunit 4 OS=Homo sapiens OX=9606 GN=PSMD4 PE=1 SV=1	1	1	1	1	6.6	40.736
P55056	APOC4	sp|P55056|APOC4_HUMAN Apolipoprotein C-IV OS=Homo sapiens OX=9606 GN=APOC4 PE=1 SV=1	1	2	2	2	16.5	14.553	53400		16858	29409	22271	114010	58960	13056	25839	78636	44756	63444	49207	35334	75007	198800
P55058	PLTP	sp|P55058|PLTP_HUMAN Phospholipid transfer protein OS=Homo sapiens OX=9606 GN=PLTP PE=1 SV=1	1	9	9	9	24.3	54.739	65650	105990	122810	110480	125070	101390	121410	146460	82459	114790	88988	101250	126240	103110	90134	90781
P55072	VCP	sp|P55072|TERA_HUMAN Transitional endoplasmic reticulum ATPase OS=Homo sapiens OX=9606 GN=VCP PE=1 SV=4	1	26	26	25	51.5	89.321		242450			3595.3
P55103	INHBC	sp|P55103|INHBC_HUMAN Inhibin beta C chain OS=Homo sapiens OX=9606 GN=INHBC PE=2 SV=1	1	1	1	1	5.4	38.237
P55263	ADK	sp|P55263|ADK_HUMAN Adenosine kinase OS=Homo sapiens OX=9606 GN=ADK PE=1 SV=2	1	2	2	2	6.6	40.545
P55290	CDH13	sp|P55290|CAD13_HUMAN Cadherin-13 OS=Homo sapiens OX=9606 GN=CDH13 PE=1 SV=1	1	2	2	2	3.6	78.286
P55774	CCL18	sp|P55774|CCL18_HUMAN C-C motif chemokine 18 OS=Homo sapiens OX=9606 GN=CCL18 PE=1 SV=1	1	2	2	2	24.7	9.8487
P55884	EIF3B	sp|P55884|EIF3B_HUMAN Eukaryotic translation initiation factor 3 subunit B OS=Homo sapiens OX=9606 GN=EIF3B PE=1 SV=3	1	6	6	6	8.7	92.48
P59666;P59665	DEFA3; DEFA1	sp|P59666|DEF3_HUMAN Neutrophil defensin 3 OS=Homo sapiens OX=9606 GN=DEFA3 PE=1 SV=1;sp|P59665|DEF1_HUMAN Neutrophil defensin 1 OS=Homo sapiens OX=9606 GN=DEFA1 PE=1 SV=1	2	2	2	2	19.1	10.245	72001	1727500	295810	248160	116430	104330	38840		47554	48234	61053	61760	40557	42468	30362	38405
P59998	ARPC4	sp|P59998|ARPC4_HUMAN Actin-related protein 2/3 complex subunit 4 OS=Homo sapiens OX=9606 GN=ARPC4 PE=1 SV=3	1	2	2	2	11.3	19.667
P60174	TPI1	sp|P60174|TPIS_HUMAN Triosephosphate isomerase OS=Homo sapiens OX=9606 GN=TPI1 PE=1 SV=4	1	10	10	10	61.4	26.669	13638	220910		19008	18815
P60660	MYL6	sp|P60660|MYL6_HUMAN Myosin light polypeptide 6 OS=Homo sapiens OX=9606 GN=MYL6 PE=1 SV=2	1	3	3	3	24.5	16.93
P60709;Q9BYX7	ACTB	sp|P60709|ACTB_HUMAN Actin, cytoplasmic 1 OS=Homo sapiens OX=9606 GN=ACTB PE=1 SV=1	2	16	1	1	58.7	41.736
P60891;P11908;P21108	PRPS1	sp|P60891|PRPS1_HUMAN Ribose-phosphate pyrophosphokinase 1 OS=Homo sapiens OX=9606 GN=PRPS1 PE=1 SV=2	3	7	7	7	32.1	34.834
P60900	PSMA6	sp|P60900|PSA6_HUMAN Proteasome subunit alpha type-6 OS=Homo sapiens OX=9606 GN=PSMA6 PE=1 SV=1	1	10	10	10	46.3	27.399	143860	340340	35999	38767	13697		14731	13720	43612
P60953	CDC42	sp|P60953|CDC42_HUMAN Cell division control protein 42 homolog OS=Homo sapiens OX=9606 GN=CDC42 PE=1 SV=2	1	4	4	3	23.6	21.258
P61006	RAB8A	sp|P61006|RAB8A_HUMAN Ras-related protein Rab-8A OS=Homo sapiens OX=9606 GN=RAB8A PE=1 SV=1	1	3	2	2	17.9	23.668
P61019;Q8WUD1	RAB2A; RAB2B	sp|P61019|RAB2A_HUMAN Ras-related protein Rab-2A OS=Homo sapiens OX=9606 GN=RAB2A PE=1 SV=1;sp|Q8WUD1|RAB2B_HUMAN Ras-related protein Rab-2B OS=Homo sapiens OX=9606 GN=RAB2B PE=1 SV=1	2	3	3	3	16.5	23.545
P61020;P51148;P20339	RAB5B; RAB5C	sp|P61020|RAB5B_HUMAN Ras-related protein Rab-5B OS=Homo sapiens OX=9606 GN=RAB5B PE=1 SV=1;sp|P51148|RAB5C_HUMAN Ras-related protein Rab-5C OS=Homo sapiens OX=9606 GN=RAB5C PE=1 SV=2;sp|P20339|RAB5A_HUMAN Ras-related protein Rab-5A OS=Homo sapiens OX=9606	3	4	4	4	21.4	23.707
P61106	RAB14	sp|P61106|RAB14_HUMAN Ras-related protein Rab-14 OS=Homo sapiens OX=9606 GN=RAB14 PE=1 SV=4	1	2	2	2	18.6	23.897
P61158;Q9P1U1	ACTR3	sp|P61158|ARP3_HUMAN Actin-related protein 3 OS=Homo sapiens OX=9606 GN=ACTR3 PE=1 SV=3	2	4	4	4	16	47.371
P61160	ACTR2	sp|P61160|ARP2_HUMAN Actin-related protein 2 OS=Homo sapiens OX=9606 GN=ACTR2 PE=1 SV=1	1	4	4	4	12.7	44.76
P61204;P84077;P84085	ARF3; ARF1; ARF5	sp|P61204|ARF3_HUMAN ADP-ribosylation factor 3 OS=Homo sapiens OX=9606 GN=ARF3 PE=1 SV=2;sp|P84077|ARF1_HUMAN ADP-ribosylation factor 1 OS=Homo sapiens OX=9606 GN=ARF1 PE=1 SV=2;sp|P84085|ARF5_HUMAN ADP-ribosylation factor 5 OS=Homo sapiens OX=9606 GN=ARF5	3	8	8	4	50.8	20.601
P61224;A6NIZ1	RAP1B	sp|P61224|RAP1B_HUMAN Ras-related protein Rap-1b OS=Homo sapiens OX=9606 GN=RAP1B PE=1 SV=1;sp|A6NIZ1|RP1BL_HUMAN Ras-related protein Rap-1b-like protein OS=Homo sapiens OX=9606 PE=2 SV=1	2	5	5	1	34.2	20.825
P61247	RPS3A	sp|P61247|RS3A_HUMAN 40S ribosomal protein S3a OS=Homo sapiens OX=9606 GN=RPS3A PE=1 SV=2	1	3	3	3	15.2	29.945
P61313	RPL15	sp|P61313|RL15_HUMAN 60S ribosomal protein L15 OS=Homo sapiens OX=9606 GN=RPL15 PE=1 SV=2	1	1	1	1	5.9	24.146
P61457	PCBD1	sp|P61457|PHS_HUMAN Pterin-4-alpha-carbinolamine dehydratase OS=Homo sapiens OX=9606 GN=PCBD1 PE=1 SV=2	1	2	2	2	20.2	11.999
P61604	HSPE1	sp|P61604|CH10_HUMAN 10 kDa heat shock protein, mitochondrial OS=Homo sapiens OX=9606 GN=HSPE1 PE=1 SV=2	1	2	2	2	25.5	10.932
P61626	LYZ	sp|P61626|LYSC_HUMAN Lysozyme C OS=Homo sapiens OX=9606 GN=LYZ PE=1 SV=1	1	2	2	2	27	16.537	24408		60220			212320			66580		130550		42575
P61769	B2M	sp|P61769|B2MG_HUMAN Beta-2-microglobulin OS=Homo sapiens OX=9606 GN=B2M PE=1 SV=1	1	2	2	2	26.9	13.714	84019	75112	72051	63521		413830	67817	82821	86662	81023	68645	83581	66781	57340		55444
P61978	HNRNPK	sp|P61978|HNRPK_HUMAN Heterogeneous nuclear ribonucleoprotein K OS=Homo sapiens OX=9606 GN=HNRNPK PE=1 SV=1	1	3	3	3	9.5	50.976
P61981	YWHAG	sp|P61981|1433G_HUMAN 14-3-3 protein gamma OS=Homo sapiens OX=9606 GN=YWHAG PE=1 SV=2	1	4	3	3	21.5	28.302
P62081	RPS7	sp|P62081|RS7_HUMAN 40S ribosomal protein S7 OS=Homo sapiens OX=9606 GN=RPS7 PE=1 SV=1	1	1	1	1	11.3	22.127
P62136;P36873	PPP1CA; PPP1CC	sp|P62136|PP1A_HUMAN Serine/threonine-protein phosphatase PP1-alpha catalytic subunit OS=Homo sapiens OX=9606 GN=PPP1CA PE=1 SV=1;sp|P36873|PP1G_HUMAN Serine/threonine-protein phosphatase PP1-gamma catalytic subunit OS=Homo sapiens OX=9606 GN=PPP1CC PE=1 S	2	7	7	1	27.3	37.512
P62191	PSMC1	sp|P62191|PRS4_HUMAN 26S proteasome regulatory subunit 4 OS=Homo sapiens OX=9606 GN=PSMC1 PE=1 SV=1	1	4	4	4	13.6	49.184
P62195	PSMC5	sp|P62195|PRS8_HUMAN 26S proteasome regulatory subunit 8 OS=Homo sapiens OX=9606 GN=PSMC5 PE=1 SV=1	1	9	9	9	30.5	45.626
P62258	YWHAE	sp|P62258|1433E_HUMAN 14-3-3 protein epsilon OS=Homo sapiens OX=9606 GN=YWHAE PE=1 SV=1	1	6	5	5	32.9	29.174	37389	68989	13649
P62277	RPS13	sp|P62277|RS13_HUMAN 40S ribosomal protein S13 OS=Homo sapiens OX=9606 GN=RPS13 PE=1 SV=2	1	1	1	1	9.9	17.222
P62330	ARF6	sp|P62330|ARF6_HUMAN ADP-ribosylation factor 6 OS=Homo sapiens OX=9606 GN=ARF6 PE=1 SV=2	1	4	4	4	37.1	20.082
P62333	PSMC6	sp|P62333|PRS10_HUMAN 26S proteasome regulatory subunit 10B OS=Homo sapiens OX=9606 GN=PSMC6 PE=1 SV=1	1	12	12	12	36.2	44.172
P62424	RPL7A	sp|P62424|RL7A_HUMAN 60S ribosomal protein L7a OS=Homo sapiens OX=9606 GN=RPL7A PE=1 SV=2	1	2	2	2	10.5	29.995
P62701;P22090;Q8TD47	RPS4X	sp|P62701|RS4X_HUMAN 40S ribosomal protein S4, X isoform OS=Homo sapiens OX=9606 GN=RPS4X PE=1 SV=2	3	6	6	6	27.8	29.597
P67775;P62714	PPP2CA	sp|P67775|PP2AA_HUMAN Serine/threonine-protein phosphatase 2A catalytic subunit alpha isoform OS=Homo sapiens OX=9606 GN=PPP2CA PE=1 SV=1;sp|P62714|PP2AB_HUMAN Serine/threonine-protein phosphatase 2A catalytic subunit beta isoform OS=Homo sapiens OX=9606 G	2	2	2	2	8.4	35.594
P62805	H4C1	sp|P62805|H4_HUMAN Histone H4 OS=Homo sapiens OX=9606 GN=H4C1 PE=1 SV=2	1	6	6	6	51.5	11.367	137040	6923800	292570	109810	231240	820650	21923		4062.3	1988.3		928.52		3983.5	3579.9	874.27
P62820;Q9H0U4;Q92928;Q92930;P51153;P59190	RAB1A; RAB1B	sp|P62820|RAB1A_HUMAN Ras-related protein Rab-1A OS=Homo sapiens OX=9606 GN=RAB1A PE=1 SV=3;sp|Q9H0U4|RAB1B_HUMAN Ras-related protein Rab-1B OS=Homo sapiens OX=9606 GN=RAB1B PE=1 SV=1;sp|Q92928|RAB1C_HUMAN Putative Ras-related protein Rab-1C OS=Homo sapien	6	4	4	3	29.3	22.677		186010			3898	5288.6
P62826	RAN	sp|P62826|RAN_HUMAN GTP-binding nuclear protein Ran OS=Homo sapiens OX=9606 GN=RAN PE=1 SV=3	1	3	3	3	18.1	24.423
P62829	RPL23	sp|P62829|RL23_HUMAN 60S ribosomal protein L23 OS=Homo sapiens OX=9606 GN=RPL23 PE=1 SV=1	1	1	1	1	14.3	14.865
P62834	RAP1A	sp|P62834|RAP1A_HUMAN Ras-related protein Rap-1A OS=Homo sapiens OX=9606 GN=RAP1A PE=1 SV=1	1	5	1	1	34.2	20.987
P62879;P62873;P16520;Q9HAV0	GNB2; GNB1	sp|P62879|GBB2_HUMAN Guanine nucleotide-binding protein G(I)/G(S)/G(T) subunit beta-2 OS=Homo sapiens OX=9606 GN=GNB2 PE=1 SV=3;sp|P62873|GBB1_HUMAN Guanine nucleotide-binding protein G(I)/G(S)/G(T) subunit beta-1 OS=Homo sapiens OX=9606 GN=GNB1 PE=1 SV=3;	4	2	2	2	6.2	37.331
P62888	RPL30	sp|P62888|RL30_HUMAN 60S ribosomal protein L30 OS=Homo sapiens OX=9606 GN=RPL30 PE=1 SV=2	1	3	3	3	40.9	12.784
P62913	RPL11	sp|P62913|RL11_HUMAN 60S ribosomal protein L11 OS=Homo sapiens OX=9606 GN=RPL11 PE=1 SV=2	1	1	1	1	7.9	20.252
P62937;F5H284;Q9Y536;P0DN26;A0A0B4J2A2;A0A075B767;A0A075B759	PPIA	sp|P62937|PPIA_HUMAN Peptidyl-prolyl cis-trans isomerase A OS=Homo sapiens OX=9606 GN=PPIA PE=1 SV=2	7	4	4	4	31.5	18.012	54346	93688	33618	31406	47858	51111
P63010;Q10567	AP2B1; AP1B1	sp|P63010|AP2B1_HUMAN AP-2 complex subunit beta OS=Homo sapiens OX=9606 GN=AP2B1 PE=1 SV=1;sp|Q10567|AP1B1_HUMAN AP-1 complex subunit beta-1 OS=Homo sapiens OX=9606 GN=AP1B1 PE=1 SV=2	2	1	1	1	1.6	104.55
P63104	YWHAZ	sp|P63104|1433Z_HUMAN 14-3-3 protein zeta/delta OS=Homo sapiens OX=9606 GN=YWHAZ PE=1 SV=1	1	7	7	6	38.4	27.745	69662	172390	30632		24990	45171
P63241;Q9GZV4;Q6IS14	EIF5A; EIF5A2	sp|P63241|IF5A1_HUMAN Eukaryotic translation initiation factor 5A-1 OS=Homo sapiens OX=9606 GN=EIF5A PE=1 SV=2;sp|Q9GZV4|IF5A2_HUMAN Eukaryotic translation initiation factor 5A-2 OS=Homo sapiens OX=9606 GN=EIF5A2 PE=1 SV=3;sp|Q6IS14|IF5AL_HUMAN Eukaryotic	3	2	2	2	19.5	16.832
P63244	RACK1	sp|P63244|RACK1_HUMAN Receptor of activated protein C kinase 1 OS=Homo sapiens OX=9606 GN=RACK1 PE=1 SV=3	1	11	11	11	51.1	35.076	1239.7	170460
P63261	ACTG1	sp|P63261|ACTG_HUMAN Actin, cytoplasmic 2 OS=Homo sapiens OX=9606 GN=ACTG1 PE=1 SV=1	1	16	16	1	58.7	41.792	298140	3244400	453360	313700	477080	612980	168130	55999	105710	60439	71424	46606	38834	59699	38655	75570
P67809;P16989;Q9Y2T7	YBX1; YBX3; YBX2	sp|P67809|YBOX1_HUMAN Y-box-binding protein 1 OS=Homo sapiens OX=9606 GN=YBX1 PE=1 SV=3;sp|P16989|YBOX3_HUMAN Y-box-binding protein 3 OS=Homo sapiens OX=9606 GN=YBX3 PE=1 SV=4;sp|Q9Y2T7|YBOX2_HUMAN Y-box-binding protein 2 OS=Homo sapiens OX=9606 GN=YBX2 PE	3	4	4	4	20.1	35.924
P68133;P68032;P62736;P63267	ACTA1; ACTC1	sp|P68133|ACTS_HUMAN Actin, alpha skeletal muscle OS=Homo sapiens OX=9606 GN=ACTA1 PE=1 SV=1;sp|P68032|ACTC_HUMAN Actin, alpha cardiac muscle 1 OS=Homo sapiens OX=9606 GN=ACTC1 PE=1 SV=1;sp|P62736|ACTA_HUMAN Actin, aortic smooth muscle OS=Homo sapiens OX=9	4	11	3	3	35.5	42.051
P68104;Q5VTE0;Q05639	EEF1A1; EEF1A1P5	sp|P68104|EF1A1_HUMAN Elongation factor 1-alpha 1 OS=Homo sapiens OX=9606 GN=EEF1A1 PE=1 SV=1;sp|Q5VTE0|EF1A3_HUMAN Putative elongation factor 1-alpha-like 3 OS=Homo sapiens OX=9606 GN=EEF1A1P5 PE=5 SV=1	3	13	13	13	32.3	50.14	35535	1124100	9640.3	28070							4308
P68363;Q9H853	TUBA1B	sp|P68363|TBA1B_HUMAN Tubulin alpha-1B chain OS=Homo sapiens OX=9606 GN=TUBA1B PE=1 SV=1	2	15	15	0	48.1	50.151	41386	832470		10675		3521.5
P68366	TUBA4A	sp|P68366|TBA4A_HUMAN Tubulin alpha-4A chain OS=Homo sapiens OX=9606 GN=TUBA4A PE=1 SV=1	1	13	1	1	42	49.924
P68371;P04350	TUBB4B; TUBB4A	sp|P68371|TBB4B_HUMAN Tubulin beta-4B chain OS=Homo sapiens OX=9606 GN=TUBB4B PE=1 SV=1;sp|P04350|TBB4A_HUMAN Tubulin beta-4A chain OS=Homo sapiens OX=9606 GN=TUBB4A PE=1 SV=2	2	18	18	2	56.9	49.83	32167	566760		4387				2269.5
P68871	HBB	sp|P68871|HBB_HUMAN Hemoglobin subunit beta OS=Homo sapiens OX=9606 GN=HBB PE=1 SV=2	1	14	14	7	95.2	15.998	6174300	4879400	9553000	10082000	22102000	3617500	8287500	9306800	7062500	8822500	6583300	17324000	13896000	11693000	12101000	8486400
P69892;P69891	HBG2; HBG1	sp|P69892|HBG2_HUMAN Hemoglobin subunit gamma-2 OS=Homo sapiens OX=9606 GN=HBG2 PE=1 SV=2;sp|P69891|HBG1_HUMAN Hemoglobin subunit gamma-1 OS=Homo sapiens OX=9606 GN=HBG1 PE=1 SV=2	2	5	4	3	42.9	16.126				23407	31196		29612	12014		21150		23872	54103	18985	21547
P69905	HBA1	sp|P69905|HBA_HUMAN Hemoglobin subunit alpha OS=Homo sapiens OX=9606 GN=HBA1 PE=1 SV=2	1	10	10	6	91.5	15.257	4990500	4385300	7790800	9164300	19787000	2608300	6789800	8112000	5793400	7022600	5307400	15841000	12395000	10603000	10118000	6962900
P78417	GSTO1	sp|P78417|GSTO1_HUMAN Glutathione S-transferase omega-1 OS=Homo sapiens OX=9606 GN=GSTO1 PE=1 SV=2	1	4	4	4	17.8	27.566
P78509	RELN	sp|P78509|RELN_HUMAN Reelin OS=Homo sapiens OX=9606 GN=RELN PE=1 SV=3	1	3	3	3	1.2	388.38
P80108	GPLD1	sp|P80108|PHLD_HUMAN Phosphatidylinositol-glycan-specific phospholipase D OS=Homo sapiens OX=9606 GN=GPLD1 PE=1 SV=3	1	20	20	20	30.4	92.335	95642	190190	107740	145610	107690	206490	125240	143590	155730	125690	159870	147260	201100	190460	244340	177900
P80188	LCN2	sp|P80188|NGAL_HUMAN Neutrophil gelatinase-associated lipocalin OS=Homo sapiens OX=9606 GN=LCN2 PE=1 SV=2	1	3	3	3	26.8	22.588
P80404	ABAT	sp|P80404|GABT_HUMAN 4-aminobutyrate aminotransferase, mitochondrial OS=Homo sapiens OX=9606 GN=ABAT PE=1 SV=3	1	12	12	12	32	56.438
P80748	IGLV3-21	sp|P80748|LV321_HUMAN Immunoglobulin lambda variable 3-21 OS=Homo sapiens OX=9606 GN=IGLV3-21 PE=1 SV=2	1	6	6	4	48.7	12.446	395590	723100	273850	275470	1010500	550900	819720	396490	1082800	3946700	2358800	1048800		3769500	969860	890010
P98160	HSPG2	sp|P98160|PGBM_HUMAN Basement membrane-specific heparan sulfate proteoglycan core protein OS=Homo sapiens OX=9606 GN=HSPG2 PE=1 SV=4	1	20	20	20	6.4	468.83		414290	34758	17122	70638	35195	55791	39379		15351	120750	124430
Q00266;P31153	MAT1A	sp|Q00266|METK1_HUMAN S-adenosylmethionine synthase isoform type-1 OS=Homo sapiens OX=9606 GN=MAT1A PE=1 SV=2	2	12	12	12	38.7	43.647		448210							2949
Q00610;P53675	CLTC	sp|Q00610|CLH1_HUMAN Clathrin heavy chain 1 OS=Homo sapiens OX=9606 GN=CLTC PE=1 SV=5	2	27	27	27	21.4	191.61		354070			6958.7		10634						8846.9
Q00765	REEP5	sp|Q00765|REEP5_HUMAN Receptor expression-enhancing protein 5 OS=Homo sapiens OX=9606 GN=REEP5 PE=1 SV=3	1	2	2	2	11.1	21.493
Q00796	SORD	sp|Q00796|DHSO_HUMAN Sorbitol dehydrogenase OS=Homo sapiens OX=9606 GN=SORD PE=1 SV=4	1	16	16	16	61.9	38.324
Q01082;P11277;O15020	SPTBN1	sp|Q01082|SPTB2_HUMAN Spectrin beta chain, non-erythrocytic 1 OS=Homo sapiens OX=9606 GN=SPTBN1 PE=1 SV=2	3	20	20	20	11.9	274.61
Q01518	CAP1	sp|Q01518|CAP1_HUMAN Adenylyl cyclase-associated protein 1 OS=Homo sapiens OX=9606 GN=CAP1 PE=1 SV=5	1	2	2	2	5.9	51.901
Q01638	IL1RL1	sp|Q01638|ILRL1_HUMAN Interleukin-1 receptor-like 1 OS=Homo sapiens OX=9606 GN=IL1RL1 PE=1 SV=4	1	2	2	2	6.5	63.357
Q02252	ALDH6A1	sp|Q02252|MMSA_HUMAN Methylmalonate-semialdehyde dehydrogenase [acylating], mitochondrial OS=Homo sapiens OX=9606 GN=ALDH6A1 PE=1 SV=2	1	4	4	4	9.7	57.839
Q02790	FKBP4	sp|Q02790|FKBP4_HUMAN Peptidyl-prolyl cis-trans isomerase FKBP4 OS=Homo sapiens OX=9606 GN=FKBP4 PE=1 SV=3	1	2	2	2	7.6	51.804
Q02985	CFHR3	sp|Q02985|FHR3_HUMAN Complement factor H-related protein 3 OS=Homo sapiens OX=9606 GN=CFHR3 PE=1 SV=2	1	8	6	2	25.8	37.323	106900	41749	49182			85625	58148	30553		90350	32643	64111			32194	57607
Q03013	GSTM4	sp|Q03013|GSTM4_HUMAN Glutathione S-transferase Mu 4 OS=Homo sapiens OX=9606 GN=GSTM4 PE=1 SV=3	1	6	6	1	34.4	25.561
Q03154	ACY1	sp|Q03154|ACY1_HUMAN Aminoacylase-1 OS=Homo sapiens OX=9606 GN=ACY1 PE=1 SV=1	1	6	6	6	18.9	45.884	9902.5	95355
Q03591	CFHR1	sp|Q03591|FHR1_HUMAN Complement factor H-related protein 1 OS=Homo sapiens OX=9606 GN=CFHR1 PE=1 SV=2	1	11	5	1	35.5	37.65	980940	395400	610360	321570	738660	833050	538160	599600	601180	552400	709890	620930	527380	65594	557860	567430
Q04446	GBE1	sp|Q04446|GLGB_HUMAN 1,4-alpha-glucan-branching enzyme OS=Homo sapiens OX=9606 GN=GBE1 PE=1 SV=3	1	4	4	4	8.8	80.473
Q04756;CON__ENSEMBL:ENSBTAP00000023055	HGFAC	sp|Q04756|HGFA_HUMAN Hepatocyte growth factor activator OS=Homo sapiens OX=9606 GN=HGFAC PE=1 SV=1	2	12	12	12	22.6	70.681	55810	47200	73341	81978	120370	129350	65790	107570	62339	100280	178800	113880	122050	104130	116600	127210
Q04828;P42330;P52895	AKR1C1; AKR1C3	sp|Q04828|AK1C1_HUMAN Aldo-keto reductase family 1 member C1 OS=Homo sapiens OX=9606 GN=AKR1C1 PE=1 SV=1;sp|P42330|AK1C3_HUMAN Aldo-keto reductase family 1 member C3 OS=Homo sapiens OX=9606 GN=AKR1C3 PE=1 SV=4;sp|P52895|AK1C2_HUMAN Aldo-keto reductase fami	3	6	4	4	26.6	36.788
Q06033;CON__Q0V8M9	ITIH3	sp|Q06033|ITIH3_HUMAN Inter-alpha-trypsin inhibitor heavy chain H3 OS=Homo sapiens OX=9606 GN=ITIH3 PE=1 SV=2	2	18	18	18	27.8	99.848	524060	286410	597750	210120	531660	219240	479710	652040	540650	304450	262170	317250	248030	132470	161470	219000
Q06141	REG3A	sp|Q06141|REG3A_HUMAN Regenerating islet-derived protein 3-alpha OS=Homo sapiens OX=9606 GN=REG3A PE=1 SV=1	1	4	4	4	36.6	19.395
Q06210;O94808	GFPT1	sp|Q06210|GFPT1_HUMAN Glutamine--fructose-6-phosphate aminotransferase [isomerizing] 1 OS=Homo sapiens OX=9606 GN=GFPT1 PE=1 SV=3	2	8	8	8	16.5	78.806
Q06278	AOX1	sp|Q06278|AOXA_HUMAN Aldehyde oxidase OS=Homo sapiens OX=9606 GN=AOX1 PE=1 SV=2	1	41	41	40	40.7	147.92		678970		639.49		979.81								870.99
Q06323	PSME1	sp|Q06323|PSME1_HUMAN Proteasome activator complex subunit 1 OS=Homo sapiens OX=9606 GN=PSME1 PE=1 SV=1	1	5	5	5	20.9	28.723
Q06520	SULT2A1	sp|Q06520|ST2A1_HUMAN Sulfotransferase 2A1 OS=Homo sapiens OX=9606 GN=SULT2A1 PE=1 SV=3	1	7	7	7	30.9	33.779
Q06830	PRDX1	sp|Q06830|PRDX1_HUMAN Peroxiredoxin-1 OS=Homo sapiens OX=9606 GN=PRDX1 PE=1 SV=1	1	7	7	6	47.2	22.11		207600		20762
Q07954	LRP1	sp|Q07954|LRP1_HUMAN Prolow-density lipoprotein receptor-related protein 1 OS=Homo sapiens OX=9606 GN=LRP1 PE=1 SV=2	1	16	16	16	4.9	504.6	11735	46765	18336	17918	8478	31846	9693.6	6362	7615.1				5505.1		8362.9
Q08257	CRYZ	sp|Q08257|QOR_HUMAN Quinone oxidoreductase OS=Homo sapiens OX=9606 GN=CRYZ PE=1 SV=1	1	7	7	7	32.2	35.206
Q08380	LGALS3BP	sp|Q08380|LG3BP_HUMAN Galectin-3-binding protein OS=Homo sapiens OX=9606 GN=LGALS3BP PE=1 SV=1	1	19	19	19	40.5	65.33	1148700	1031800	796340	586480	875350	981230	456490	1070800	1012000	512390	660830	689090	737740	1360300	807300	865810
Q08830	FGL1	sp|Q08830|FGL1_HUMAN Fibrinogen-like protein 1 OS=Homo sapiens OX=9606 GN=FGL1 PE=1 SV=3	1	4	4	4	16	36.379	90122	11242	41332	10826	9260.3	32886				21528
Q12805	EFEMP1	sp|Q12805|FBLN3_HUMAN EGF-containing fibulin-like extracellular matrix protein 1 OS=Homo sapiens OX=9606 GN=EFEMP1 PE=1 SV=2	1	9	9	9	27.6	54.64	40984	60934	68060	39414	54960	63117	60352	57230	45072	41041	74273	37160	40589	28488	57024	30860
Q12882	DPYD	sp|Q12882|DPYD_HUMAN Dihydropyrimidine dehydrogenase [NADP(+)] OS=Homo sapiens OX=9606 GN=DPYD PE=1 SV=2	1	2	2	2	2.6	111.4
Q13011	ECH1	sp|Q13011|ECH1_HUMAN Delta(3,5)-Delta(2,4)-dienoyl-CoA isomerase, mitochondrial OS=Homo sapiens OX=9606 GN=ECH1 PE=1 SV=2	1	4	4	4	16.2	35.816
Q13057	COASY	sp|Q13057|COASY_HUMAN Bifunctional coenzyme A synthase OS=Homo sapiens OX=9606 GN=COASY PE=1 SV=4	1	3	3	3	7.4	62.328
Q13103	SPP2	sp|Q13103|SPP24_HUMAN Secreted phosphoprotein 24 OS=Homo sapiens OX=9606 GN=SPP2 PE=1 SV=1	1	5	5	4	28	24.337	21011	58231	16456	14235	11963	28132	35316	37274	31754	22840	22035	27144	30986	41206	22783	25871
Q13200	PSMD2	sp|Q13200|PSMD2_HUMAN 26S proteasome non-ATPase regulatory subunit 2 OS=Homo sapiens OX=9606 GN=PSMD2 PE=1 SV=3	1	10	10	10	14.8	100.2
Q13228	SELENBP1	sp|Q13228|SBP1_HUMAN Methanethiol oxidase OS=Homo sapiens OX=9606 GN=SELENBP1 PE=1 SV=2	1	10	10	10	27.1	52.39
Q13347	EIF3I	sp|Q13347|EIF3I_HUMAN Eukaryotic translation initiation factor 3 subunit I OS=Homo sapiens OX=9606 GN=EIF3I PE=1 SV=1	1	3	3	3	11.7	36.501
Q13561	DCTN2	sp|Q13561|DCTN2_HUMAN Dynactin subunit 2 OS=Homo sapiens OX=9606 GN=DCTN2 PE=1 SV=4	1	4	4	4	14.5	44.23
Q13576	IQGAP2	sp|Q13576|IQGA2_HUMAN Ras GTPase-activating-like protein IQGAP2 OS=Homo sapiens OX=9606 GN=IQGAP2 PE=1 SV=4	1	14	14	14	12.3	180.58
Q13630	GFUS	sp|Q13630|FCL_HUMAN GDP-L-fucose synthase OS=Homo sapiens OX=9606 GN=GFUS PE=1 SV=1	1	2	2	2	5.9	35.892
Q13642	FHL1	sp|Q13642|FHL1_HUMAN Four and a half LIM domains protein 1 OS=Homo sapiens OX=9606 GN=FHL1 PE=1 SV=4	1	8	8	8	31.9	36.263		102380			69044
Q13790	APOF	sp|Q13790|APOF_HUMAN Apolipoprotein F OS=Homo sapiens OX=9606 GN=APOF PE=1 SV=2	1	3	3	3	11.7	35.399	208940	189590	318680		216690	236460	172630	338280	258910	277980	391520	337230	326780	224320	233100	247070
Q13813	SPTAN1	sp|Q13813|SPTN1_HUMAN Spectrin alpha chain, non-erythrocytic 1 OS=Homo sapiens OX=9606 GN=SPTAN1 PE=1 SV=3	1	28	28	28	15.1	284.54		169640							13001			4340.2		8290.1
Q13867	BLMH	sp|Q13867|BLMH_HUMAN Bleomycin hydrolase OS=Homo sapiens OX=9606 GN=BLMH PE=1 SV=1	1	3	3	3	8.1	52.562	29848	46047					32001	22005
Q13885;Q9BVA1	TUBB2A; TUBB2B	sp|Q13885|TBB2A_HUMAN Tubulin beta-2A chain OS=Homo sapiens OX=9606 GN=TUBB2A PE=1 SV=1;sp|Q9BVA1|TBB2B_HUMAN Tubulin beta-2B chain OS=Homo sapiens OX=9606 GN=TUBB2B PE=1 SV=1	2	15	2	2	48.3	49.906
Q14103	HNRNPD	sp|Q14103|HNRPD_HUMAN Heterogeneous nuclear ribonucleoprotein D0 OS=Homo sapiens OX=9606 GN=HNRNPD PE=1 SV=1	1	2	2	2	6.8	38.434
Q14117;Q14195;Q14194	DPYS	sp|Q14117|DPYS_HUMAN Dihydropyrimidinase OS=Homo sapiens OX=9606 GN=DPYS PE=1 SV=1	3	13	13	13	41.4	56.629		321180					45933					70442
Q14152	EIF3A	sp|Q14152|EIF3A_HUMAN Eukaryotic translation initiation factor 3 subunit A OS=Homo sapiens OX=9606 GN=EIF3A PE=1 SV=1	1	4	4	4	3.6	166.57
Q14203	DCTN1	sp|Q14203|DCTN1_HUMAN Dynactin subunit 1 OS=Homo sapiens OX=9606 GN=DCTN1 PE=1 SV=3	1	3	3	3	2.9	141.69
Q14204	DYNC1H1	sp|Q14204|DYHC1_HUMAN Cytoplasmic dynein 1 heavy chain 1 OS=Homo sapiens OX=9606 GN=DYNC1H1 PE=1 SV=5	1	15	15	15	4.1	532.4		59474			11746
Q14376	GALE	sp|Q14376|GALE_HUMAN UDP-glucose 4-epimerase OS=Homo sapiens OX=9606 GN=GALE PE=1 SV=2	1	7	7	7	27.9	38.281
Q14520	HABP2	sp|Q14520|HABP2_HUMAN Hyaluronan-binding protein 2 OS=Homo sapiens OX=9606 GN=HABP2 PE=1 SV=1	1	17	17	17	38	62.671	255740	610100	229250	129620	184980	337410	226120	201970	153070	176230	218150	174100	170890	175430	161970	175960
Q14558	PRPSAP1	sp|Q14558|KPRA_HUMAN Phosphoribosyl pyrophosphate synthase-associated protein 1 OS=Homo sapiens OX=9606 GN=PRPSAP1 PE=1 SV=2	1	3	3	3	12.1	39.393
Q14624;CON__Q3T052	ITIH4	sp|Q14624|ITIH4_HUMAN Inter-alpha-trypsin inhibitor heavy chain H4 OS=Homo sapiens OX=9606 GN=ITIH4 PE=1 SV=4	2	36	36	36	46	103.36	2794300	1224800	2322500	2158400	2049400	1985800	2337500	2733400	2038700	2059200	2527500	2033400	2220600	2096500	1693500	2178500
Q14643	ITPR1	sp|Q14643|ITPR1_HUMAN Inositol 1,4,5-trisphosphate receptor type 1 OS=Homo sapiens OX=9606 GN=ITPR1 PE=1 SV=3	1	1	1	1	0.4	313.93
Q14697	GANAB	sp|Q14697|GANAB_HUMAN Neutral alpha-glucosidase AB OS=Homo sapiens OX=9606 GN=GANAB PE=1 SV=3	1	7	7	7	8.8	106.87	4206.6	66107	13837	3564.1		4189.8	5992.3		4177.8			3958.9	4056
Q14749	GNMT	sp|Q14749|GNMT_HUMAN Glycine N-methyltransferase OS=Homo sapiens OX=9606 GN=GNMT PE=1 SV=3	1	6	6	6	31.2	32.742
Q14766	LTBP1	sp|Q14766|LTBP1_HUMAN Latent-transforming growth factor beta-binding protein 1 OS=Homo sapiens OX=9606 GN=LTBP1 PE=1 SV=4	1	2	2	2	1.7	186.79
Q14894	CRYM	sp|Q14894|CRYM_HUMAN Ketimine reductase mu-crystallin OS=Homo sapiens OX=9606 GN=CRYM PE=1 SV=1	1	3	3	3	15.3	33.775
Q14914	PTGR1	sp|Q14914|PTGR1_HUMAN Prostaglandin reductase 1 OS=Homo sapiens OX=9606 GN=PTGR1 PE=1 SV=2	1	8	8	8	29.5	35.869
Q15008	PSMD6	sp|Q15008|PSMD6_HUMAN 26S proteasome non-ATPase regulatory subunit 6 OS=Homo sapiens OX=9606 GN=PSMD6 PE=1 SV=1	1	10	10	10	28	45.531
Q15113	PCOLCE	sp|Q15113|PCOC1_HUMAN Procollagen C-endopeptidase enhancer 1 OS=Homo sapiens OX=9606 GN=PCOLCE PE=1 SV=2	1	3	3	3	9.1	47.972		6386.2				18336
Q15166	PON3	sp|Q15166|PON3_HUMAN Serum paraoxonase/lactonase 3 OS=Homo sapiens OX=9606 GN=PON3 PE=1 SV=3	1	3	3	3	10.7	39.607		14217									23506				10814
Q15274	QPRT	sp|Q15274|NADC_HUMAN Nicotinate-nucleotide pyrophosphorylase [carboxylating] OS=Homo sapiens OX=9606 GN=QPRT PE=1 SV=3	1	3	3	3	13.5	30.845
Q15365	PCBP1	sp|Q15365|PCBP1_HUMAN Poly(rC)-binding protein 1 OS=Homo sapiens OX=9606 GN=PCBP1 PE=1 SV=2	1	3	3	2	11.2	37.497
Q15436;Q15437	SEC23A	sp|Q15436|SC23A_HUMAN Protein transport protein Sec23A OS=Homo sapiens OX=9606 GN=SEC23A PE=1 SV=2	2	6	6	6	9.8	86.16
Q15485	FCN2	sp|Q15485|FCN2_HUMAN Ficolin-2 OS=Homo sapiens OX=9606 GN=FCN2 PE=1 SV=2	1	9	9	8	34.8	34.001	24461	211340	468930	340440	340660	147540	409620	549840	484350	664240	107490	131440	109630	291250	525010	340540
Q15582	TGFBI	sp|Q15582|BGH3_HUMAN Transforming growth factor-beta-induced protein ig-h3 OS=Homo sapiens OX=9606 GN=TGFBI PE=1 SV=1	1	14	14	14	26.4	74.68	183410	188480	134400	110590	103320	81997	132670	76400	89991	82001	97030	108750	92896	67285	88631	84583
Q15848	ADIPOQ	sp|Q15848|ADIPO_HUMAN Adiponectin OS=Homo sapiens OX=9606 GN=ADIPOQ PE=1 SV=1	1	2	2	2	12.3	26.413	107750	120240	415460	156210	394210	108580	393180	163220	160040	353510	96194	364930	414090	148140	128840	135200
Q16401	PSMD5	sp|Q16401|PSMD5_HUMAN 26S proteasome non-ATPase regulatory subunit 5 OS=Homo sapiens OX=9606 GN=PSMD5 PE=1 SV=3	1	4	4	4	10.9	56.195
Q16610	ECM1	sp|Q16610|ECM1_HUMAN Extracellular matrix protein 1 OS=Homo sapiens OX=9606 GN=ECM1 PE=1 SV=2	1	20	20	20	51.9	60.673	184480	188520	359230	219170	291960	210370	266240	224730	234800	210550	267540	167430	290600	196630	330660	235770
Q16698	DECR1	sp|Q16698|DECR_HUMAN 2,4-dienoyl-CoA reductase [(3E)-enoyl-CoA-producing], mitochondrial OS=Homo sapiens OX=9606 GN=DECR1 PE=1 SV=1	1	8	8	8	31	36.067
Q16706	MAN2A1	sp|Q16706|MA2A1_HUMAN Alpha-mannosidase 2 OS=Homo sapiens OX=9606 GN=MAN2A1 PE=1 SV=2	1	3	3	3	3.7	131.14
Q16719	KYNU	sp|Q16719|KYNU_HUMAN Kynureninase OS=Homo sapiens OX=9606 GN=KYNU PE=1 SV=1	1	1	1	1	3.2	52.351
Q16822	PCK2	sp|Q16822|PCKGM_HUMAN Phosphoenolpyruvate carboxykinase [GTP], mitochondrial OS=Homo sapiens OX=9606 GN=PCK2 PE=1 SV=4	1	21	21	20	41.4	70.698	41104	182220
Q16851	UGP2	sp|Q16851|UGPA_HUMAN UTP--glucose-1-phosphate uridylyltransferase OS=Homo sapiens OX=9606 GN=UGP2 PE=1 SV=5	1	21	21	21	49.8	56.94	81550	1946400	42746	34863	2912.2	6280.8	25290	7084.6	9038.3		2929.2	2446.5	3300	3478.7		3419.7
Q3LXA3	TKFC	sp|Q3LXA3|TKFC_HUMAN Triokinase/FMN cyclase OS=Homo sapiens OX=9606 GN=TKFC PE=1 SV=2	1	12	12	12	37	58.946
Q3MIT2	PUS10	sp|Q3MIT2|PUS10_HUMAN tRNA pseudouridine synthase Pus10 OS=Homo sapiens OX=9606 GN=PUS10 PE=1 SV=1	1	1	1	1	2.6	60.243
Q3SY00	TSGA10IP	sp|Q3SY00|T10IP_HUMAN Testis-specific protein 10-interacting protein OS=Homo sapiens OX=9606 GN=TSGA10IP PE=1 SV=2	1	2	2	2	5.9	62.381	9920200						11238000			13466000			15340000			11480000
Q3ZCM7	TUBB8	sp|Q3ZCM7|TBB8_HUMAN Tubulin beta-8 chain OS=Homo sapiens OX=9606 GN=TUBB8 PE=1 SV=2	1	8	2	2	25.9	49.775
Q4G0N4	NADK2	sp|Q4G0N4|NAKD2_HUMAN NAD kinase 2, mitochondrial OS=Homo sapiens OX=9606 GN=NADK2 PE=1 SV=2	1	4	4	4	12.2	49.432
Q562R1	ACTBL2	sp|Q562R1|ACTBL_HUMAN Beta-actin-like protein 2 OS=Homo sapiens OX=9606 GN=ACTBL2 PE=1 SV=2	1	4	1	1	13.8	42.003
Q5BKX8	CAVIN4	sp|Q5BKX8|CAVN4_HUMAN Caveolae-associated protein 4 OS=Homo sapiens OX=9606 GN=CAVIN4 PE=1 SV=2	1	1	1	1	3.3	41.899
Q5JR59	MTUS2	sp|Q5JR59|MTUS2_HUMAN Microtubule-associated tumor suppressor candidate 2 OS=Homo sapiens OX=9606 GN=MTUS2 PE=1 SV=3	1	2	2	2	1.5	150.19		595140							1617900
Q5JRA6	MIA3	sp|Q5JRA6|TGO1_HUMAN Transport and Golgi organization protein 1 homolog OS=Homo sapiens OX=9606 GN=MIA3 PE=1 SV=1	1	3	3	3	2.8	213.7							4690100					5695900		6699000
Q5TEC6	H3-2	sp|Q5TEC6|H3PS2_HUMAN Histone HIST2H3PS2 OS=Homo sapiens OX=9606 GN=H3-2 PE=1 SV=1	1	2	2	1	13.2	15.43	6631.8	896450	14868	10175	12659	101800
Q6EMK4	VASN	sp|Q6EMK4|VASN_HUMAN Vasorin OS=Homo sapiens OX=9606 GN=VASN PE=1 SV=1	1	5	5	5	10	71.712	19357	21782	20013	19923	29181	26927	10770	15631	8627.5	16845	23364		12517		13284	14205
Q6GTS8	PM20D1	sp|Q6GTS8|P20D1_HUMAN N-fatty-acyl-amino acid synthase/hydrolase PM20D1 OS=Homo sapiens OX=9606 GN=PM20D1 PE=1 SV=3	1	2	2	2	6.2	55.741
Q6IB77	GLYAT	sp|Q6IB77|GLYAT_HUMAN Glycine N-acyltransferase OS=Homo sapiens OX=9606 GN=GLYAT PE=1 SV=3	1	5	5	5	25	33.924
Q6P387	C16orf46	sp|Q6P387|CP046_HUMAN Uncharacterized protein C16orf46 OS=Homo sapiens OX=9606 GN=C16orf46 PE=2 SV=2	1	1	1	1	2.5	43.417
Q6PL18	ATAD2	sp|Q6PL18|ATAD2_HUMAN ATPase family AAA domain-containing protein 2 OS=Homo sapiens OX=9606 GN=ATAD2 PE=1 SV=1	1	2	2	2	2.4	158.55
Q6UX06	OLFM4	sp|Q6UX06|OLFM4_HUMAN Olfactomedin-4 OS=Homo sapiens OX=9606 GN=OLFM4 PE=1 SV=1	1	3	3	3	7.6	57.279
Q6UX71	PLXDC2	sp|Q6UX71|PXDC2_HUMAN Plexin domain-containing protein 2 OS=Homo sapiens OX=9606 GN=PLXDC2 PE=1 SV=1	1	3	3	3	7.4	59.582
Q6UXB8	PI16	sp|Q6UXB8|PI16_HUMAN Peptidase inhibitor 16 OS=Homo sapiens OX=9606 GN=PI16 PE=1 SV=1	1	5	5	5	13.6	49.471		14179		15378	12347	13312					26540	14835	16715		16763
Q6XQN6	NAPRT	sp|Q6XQN6|PNCB_HUMAN Nicotinate phosphoribosyltransferase OS=Homo sapiens OX=9606 GN=NAPRT PE=1 SV=2	1	6	6	6	16.5	57.578	10342	122560
Q6ZTQ3	RASSF6	sp|Q6ZTQ3|RASF6_HUMAN Ras association domain-containing protein 6 OS=Homo sapiens OX=9606 GN=RASSF6 PE=1 SV=1	1	1	1	1	3.8	43.383
Q76KD6	SPATC1	sp|Q76KD6|SPERI_HUMAN Speriolin OS=Homo sapiens OX=9606 GN=SPATC1 PE=2 SV=2	1	1	1	1	1.9	62.398
Q76LX8	ADAMTS13	sp|Q76LX8|ATS13_HUMAN A disintegrin and metalloproteinase with thrombospondin motifs 13 OS=Homo sapiens OX=9606 GN=ADAMTS13 PE=1 SV=1	1	4	4	4	4.4	153.6		24365	31540	12121	32794	14704	15238	20275		8974.4	16680		12364		17365	8994.3
Q7L1S5	CHST9	sp|Q7L1S5|CHST9_HUMAN Carbohydrate sulfotransferase 9 OS=Homo sapiens OX=9606 GN=CHST9 PE=2 SV=2	1	1	1	1	2	52.054
Q7L2H7	EIF3M	sp|Q7L2H7|EIF3M_HUMAN Eukaryotic translation initiation factor 3 subunit M OS=Homo sapiens OX=9606 GN=EIF3M PE=1 SV=1	1	1	1	1	5.1	42.502
Q7Z2Y8	GVINP1	sp|Q7Z2Y8|GVIN1_HUMAN Interferon-induced very large GTPase 1 OS=Homo sapiens OX=9606 GN=GVINP1 PE=2 SV=2	1	1	1	1	0.7	279.04
Q7Z4W1	DCXR	sp|Q7Z4W1|DCXR_HUMAN L-xylulose reductase OS=Homo sapiens OX=9606 GN=DCXR PE=1 SV=2	1	9	9	9	52.9	25.913	153060	1903800	7606.2	49175			30756
Q7Z5P4	HSD17B13	sp|Q7Z5P4|DHB13_HUMAN 17-beta-hydroxysteroid dehydrogenase 13 OS=Homo sapiens OX=9606 GN=HSD17B13 PE=1 SV=1	1	2	2	2	7	33.655
Q86UX7	FERMT3	sp|Q86UX7|URP2_HUMAN Fermitin family homolog 3 OS=Homo sapiens OX=9606 GN=FERMT3 PE=1 SV=1	1	3	3	3	7.2	75.952
Q86VB7	CD163	sp|Q86VB7|C163A_HUMAN Scavenger receptor cysteine-rich type 1 protein M130 OS=Homo sapiens OX=9606 GN=CD163 PE=1 SV=2	1	5	5	5	6.1	125.45	4997.2	25201	31513		14765	18555	15687		39478		4799.1	5793.7
Q86VP6	CAND1	sp|Q86VP6|CAND1_HUMAN Cullin-associated NEDD8-dissociated protein 1 OS=Homo sapiens OX=9606 GN=CAND1 PE=1 SV=2	1	10	10	10	10.7	136.37
Q8IVG5	SAMD9L	sp|Q8IVG5|SAM9L_HUMAN Sterile alpha motif domain-containing protein 9-like OS=Homo sapiens OX=9606 GN=SAMD9L PE=1 SV=2	1	1	1	1	0.8	184.53
Q8IZ83	ALDH16A1	sp|Q8IZ83|A16A1_HUMAN Aldehyde dehydrogenase family 16 member A1 OS=Homo sapiens OX=9606 GN=ALDH16A1 PE=1 SV=2	1	9	9	9	16.8	85.126		85666	18369
Q8N8K9	KIAA1958	sp|Q8N8K9|K1958_HUMAN Uncharacterized protein KIAA1958 OS=Homo sapiens OX=9606 GN=KIAA1958 PE=1 SV=1	1	2	2	2	2.8	79.211												23486				38455
Q8NGR1	OR13A1	sp|Q8NGR1|O13A1_HUMAN Olfactory receptor 13A1 OS=Homo sapiens OX=9606 GN=OR13A1 PE=2 SV=2	1	1	1	1	4.6	36.494
Q8NI99	ANGPTL6	sp|Q8NI99|ANGL6_HUMAN Angiopoietin-related protein 6 OS=Homo sapiens OX=9606 GN=ANGPTL6 PE=1 SV=1	1	5	5	5	17.2	51.694	17793	43643	11425		22844	21465	28473		16966	23507	22995	10497	20072	19993	13815	24455
Q8TBY9	CFAP251	sp|Q8TBY9|CF251_HUMAN Cilia- and flagella-associated protein 251 OS=Homo sapiens OX=9606 GN=CFAP251 PE=1 SV=2	1	1	1	1	1	129.95
Q8WWA0	ITLN1	sp|Q8WWA0|ITLN1_HUMAN Intelectin-1 OS=Homo sapiens OX=9606 GN=ITLN1 PE=1 SV=1	1	5	5	2	19.2	34.961		64083	28092	20859			15871		15122	9642
Q8WWZ8	OIT3	sp|Q8WWZ8|OIT3_HUMAN Oncoprotein-induced transcript 3 protein OS=Homo sapiens OX=9606 GN=OIT3 PE=1 SV=2	1	2	2	2	4.4	60.021	10622	12191						15710	25299			14376		17521	14694
Q8WZ42	TTN	sp|Q8WZ42|TITIN_HUMAN Titin OS=Homo sapiens OX=9606 GN=TTN PE=1 SV=4	1	3	3	3	0.2	3816					1490100		618410					242400
Q92496	CFHR4	sp|Q92496|FHR4_HUMAN Complement factor H-related protein 4 OS=Homo sapiens OX=9606 GN=CFHR4 PE=1 SV=3	1	5	1	1	10.6	65.35
Q92598;O95757	HSPH1	sp|Q92598|HS105_HUMAN Heat shock protein 105 kDa OS=Homo sapiens OX=9606 GN=HSPH1 PE=1 SV=1	2	4	4	3	6.4	96.864
Q92614	MYO18A	sp|Q92614|MY18A_HUMAN Unconventional myosin-XVIIIa OS=Homo sapiens OX=9606 GN=MYO18A PE=1 SV=3	1	4	4	4	3	233.11
Q92820	GGH	sp|Q92820|GGH_HUMAN Gamma-glutamyl hydrolase OS=Homo sapiens OX=9606 GN=GGH PE=1 SV=2	1	4	4	4	15.1	35.964	647570	261750	382130	318240	254730	243780	259800	254850	589410	271220	435340	240100	190140	251170	223370	245390
Q92947	GCDH	sp|Q92947|GCDH_HUMAN Glutaryl-CoA dehydrogenase, mitochondrial OS=Homo sapiens OX=9606 GN=GCDH PE=1 SV=1	1	2	2	2	9.4	48.127
Q92954	PRG4	sp|Q92954|PRG4_HUMAN Proteoglycan 4 OS=Homo sapiens OX=9606 GN=PRG4 PE=1 SV=3	1	7	7	7	7	151.06	89345	171750	102550	67272	27041	148910	38298	27364	58056	24177	46984	32540	30791	46756	69758	81799
Q93088	BHMT	sp|Q93088|BHMT1_HUMAN Betaine--homocysteine S-methyltransferase 1 OS=Homo sapiens OX=9606 GN=BHMT PE=1 SV=2	1	19	19	15	55.7	44.998		816040		8106.8
Q93099	HGD	sp|Q93099|HGD_HUMAN Homogentisate 1,2-dioxygenase OS=Homo sapiens OX=9606 GN=HGD PE=1 SV=2	1	16	16	16	47.4	49.963
Q96CN7	ISOC1	sp|Q96CN7|ISOC1_HUMAN Isochorismatase domain-containing protein 1 OS=Homo sapiens OX=9606 GN=ISOC1 PE=1 SV=3	1	1	1	1	5	32.236
Q96F10	SAT2	sp|Q96F10|SAT2_HUMAN Thialysine N-epsilon-acetyltransferase OS=Homo sapiens OX=9606 GN=SAT2 PE=1 SV=1	1	1	1	1	13.5	19.155
Q96GK7;Q6P2I3	FAHD2A; FAHD2B	sp|Q96GK7|FAH2A_HUMAN Fumarylacetoacetate hydrolase domain-containing protein 2A OS=Homo sapiens OX=9606 GN=FAHD2A PE=1 SV=1;sp|Q6P2I3|FAH2B_HUMAN Fumarylacetoacetate hydrolase domain-containing protein 2B OS=Homo sapiens OX=9606 GN=FAHD2B PE=1 SV=1	2	4	4	4	19.1	34.596
Q96HC4	PDLIM5	sp|Q96HC4|PDLI5_HUMAN PDZ and LIM domain protein 5 OS=Homo sapiens OX=9606 GN=PDLIM5 PE=1 SV=5	1	2	2	2	4	63.944
Q96HR9	REEP6	sp|Q96HR9|REEP6_HUMAN Receptor expression-enhancing protein 6 OS=Homo sapiens OX=9606 GN=REEP6 PE=1 SV=2	1	2	2	2	10	23.418
Q96HW7	INTS4	sp|Q96HW7|INT4_HUMAN Integrator complex subunit 4 OS=Homo sapiens OX=9606 GN=INTS4 PE=1 SV=2	1	2	2	2	1.9	108.17						275660		233710
Q96IU4	ABHD14B	sp|Q96IU4|ABHEB_HUMAN Protein ABHD14B OS=Homo sapiens OX=9606 GN=ABHD14B PE=1 SV=1	1	3	3	3	21.9	22.345
Q96IY4;CON__Q2KIG3	CPB2	sp|Q96IY4|CBPB2_HUMAN Carboxypeptidase B2 OS=Homo sapiens OX=9606 GN=CPB2 PE=1 SV=2	2	10	10	10	28.6	48.424	195220	138070	91076	99253	147360	194390	97087	119080	105420	119230	174740	182550	171970	158690	147390	162620
Q96KN2	CNDP1	sp|Q96KN2|CNDP1_HUMAN Beta-Ala-His dipeptidase OS=Homo sapiens OX=9606 GN=CNDP1 PE=1 SV=4	1	14	14	14	35.5	56.705	96030	114830	52249	65465	113120	154330	182440	187290	146210	93229	159600	103160	117830	137840	125620	171890
Q96KP4	CNDP2	sp|Q96KP4|CNDP2_HUMAN Cytosolic non-specific dipeptidase OS=Homo sapiens OX=9606 GN=CNDP2 PE=1 SV=2	1	8	8	8	25.3	52.878
Q96LJ7	DHRS1	sp|Q96LJ7|DHRS1_HUMAN Dehydrogenase/reductase SDR family member 1 OS=Homo sapiens OX=9606 GN=DHRS1 PE=1 SV=1	1	4	4	4	16.3	33.909
Q96MT7	CFAP44	sp|Q96MT7|CFA44_HUMAN Cilia- and flagella-associated protein 44 OS=Homo sapiens OX=9606 GN=CFAP44 PE=1 SV=2	1	1	1	1	0.6	213.86
Q96N76	UROC1	sp|Q96N76|HUTU_HUMAN Urocanate hydratase OS=Homo sapiens OX=9606 GN=UROC1 PE=1 SV=1	1	7	7	7	12.7	74.83
Q96PD5	PGLYRP2	sp|Q96PD5|PGRP2_HUMAN N-acetylmuramoyl-L-alanine amidase OS=Homo sapiens OX=9606 GN=PGLYRP2 PE=1 SV=1	1	15	15	12	36.5	62.216	219670	440630	321280	397490	425930	419150	371280	387980	405530	416610	726390	340930	497290	469530	469910	433650
Q96QK1	VPS35	sp|Q96QK1|VPS35_HUMAN Vacuolar protein sorting-associated protein 35 OS=Homo sapiens OX=9606 GN=VPS35 PE=1 SV=2	1	3	3	3	4.6	91.706
Q96RD9	FCRL5	sp|Q96RD9|FCRL5_HUMAN Fc receptor-like protein 5 OS=Homo sapiens OX=9606 GN=FCRL5 PE=1 SV=3	1	2	2	2	3.2	106.44				2330400	1829200				1772500	2076400	2065700	3175900	1737300	2469300	1711100	2096000
Q99436	PSMB7	sp|Q99436|PSB7_HUMAN Proteasome subunit beta type-7 OS=Homo sapiens OX=9606 GN=PSMB7 PE=1 SV=1	1	2	2	2	11.2	29.965	50271	178530		37050
Q99447	PCYT2	sp|Q99447|PCY2_HUMAN Ethanolamine-phosphate cytidylyltransferase OS=Homo sapiens OX=9606 GN=PCYT2 PE=1 SV=1	1	5	5	5	20.6	43.835
Q99460	PSMD1	sp|Q99460|PSMD1_HUMAN 26S proteasome non-ATPase regulatory subunit 1 OS=Homo sapiens OX=9606 GN=PSMD1 PE=1 SV=2	1	10	10	10	16.8	105.84
Q99714	HSD17B10	sp|Q99714|HCD2_HUMAN 3-hydroxyacyl-CoA dehydrogenase type-2 OS=Homo sapiens OX=9606 GN=HSD17B10 PE=1 SV=3	1	2	2	2	12.6	26.923
Q9BQE3	TUBA1C	sp|Q9BQE3|TBA1C_HUMAN Tubulin alpha-1C chain OS=Homo sapiens OX=9606 GN=TUBA1C PE=1 SV=1	1	15	3	2	48.3	49.895
Q9BUT1	BDH2	sp|Q9BUT1|BDH2_HUMAN 3-hydroxybutyrate dehydrogenase type 2 OS=Homo sapiens OX=9606 GN=BDH2 PE=1 SV=2	1	2	2	2	11	26.724
Q9BWD1	ACAT2	sp|Q9BWD1|THIC_HUMAN Acetyl-CoA acetyltransferase, cytosolic OS=Homo sapiens OX=9606 GN=ACAT2 PE=1 SV=2	1	4	4	4	17.6	41.35
Q9BWP8	COLEC11	sp|Q9BWP8|COL11_HUMAN Collectin-11 OS=Homo sapiens OX=9606 GN=COLEC11 PE=1 SV=1	1	3	3	3	14.8	28.665	100560	133050	25214	65425	87649	67860	82615	51390	46778	71064	98611	34569	104600	68314	67591	101480
Q9BXJ4	C1QTNF3	sp|Q9BXJ4|C1QT3_HUMAN Complement C1q tumor necrosis factor-related protein 3 OS=Homo sapiens OX=9606 GN=C1QTNF3 PE=1 SV=1	1	1	1	1	4.5	26.994
Q9BXR6	CFHR5	sp|Q9BXR6|FHR5_HUMAN Complement factor H-related protein 5 OS=Homo sapiens OX=9606 GN=CFHR5 PE=1 SV=1	1	7	6	6	13.5	64.419	56894	51684	31369	35741	26852	37333	26319	35123	53933	48123	37428	37269	38727	40597	21603	36220
Q9BYE9	CDHR2	sp|Q9BYE9|CDHR2_HUMAN Cadherin-related family member 2 OS=Homo sapiens OX=9606 GN=CDHR2 PE=1 SV=2	1	5	5	5	5.1	141.54
Q9H257	CARD9	sp|Q9H257|CARD9_HUMAN Caspase recruitment domain-containing protein 9 OS=Homo sapiens OX=9606 GN=CARD9 PE=1 SV=2	1	1	1	1	2.2	62.24
Q9H2A2	ALDH8A1	sp|Q9H2A2|AL8A1_HUMAN 2-aminomuconic semialdehyde dehydrogenase OS=Homo sapiens OX=9606 GN=ALDH8A1 PE=1 SV=1	1	8	8	8	27.9	53.401
Q9H2M3	BHMT2	sp|Q9H2M3|BHMT2_HUMAN S-methylmethionine--homocysteine S-methyltransferase BHMT2 OS=Homo sapiens OX=9606 GN=BHMT2 PE=1 SV=1	1	9	5	5	38.6	40.354
Q9H479	FN3K	sp|Q9H479|FN3K_HUMAN Fructosamine-3-kinase OS=Homo sapiens OX=9606 GN=FN3K PE=1 SV=1	1	2	2	2	9.1	35.171
Q9H8H3	METTL7A	sp|Q9H8H3|MET7A_HUMAN Methyltransferase-like protein 7A OS=Homo sapiens OX=9606 GN=METTL7A PE=1 SV=1	1	5	5	5	27.9	28.319
Q9HC35	EML4	sp|Q9HC35|EMAL4_HUMAN Echinoderm microtubule-associated protein-like 4 OS=Homo sapiens OX=9606 GN=EML4 PE=1 SV=3	1	4	4	4	7.1	108.91
Q9HC84	MUC5B	sp|Q9HC84|MUC5B_HUMAN Mucin-5B OS=Homo sapiens OX=9606 GN=MUC5B PE=1 SV=3	1	2	2	2	0.5	596.33		1646900	1721000	2529000	2284000	2066600	2239900	2110800	2207400	2538400	2880000	2578300	2198500	2154300	1847700	2432300
Q9NP78	ABCB9	sp|Q9NP78|ABCB9_HUMAN ABC-type oligopeptide transporter ABCB9 OS=Homo sapiens OX=9606 GN=ABCB9 PE=1 SV=1	1	2	2	2	2.1	84.474
Q9NP80	PNPLA8	sp|Q9NP80|PLPL8_HUMAN Calcium-independent phospholipase A2-gamma OS=Homo sapiens OX=9606 GN=PNPLA8 PE=1 SV=1	1	1	1	1	1.3	88.476
Q9NQ79	CRTAC1	sp|Q9NQ79|CRAC1_HUMAN Cartilage acidic protein 1 OS=Homo sapiens OX=9606 GN=CRTAC1 PE=1 SV=2	1	1	1	1	1.5	71.42
Q9NQC3	RTN4	sp|Q9NQC3|RTN4_HUMAN Reticulon-4 OS=Homo sapiens OX=9606 GN=RTN4 PE=1 SV=2	1	2	2	2	2.3	129.93
Q9NQR4	NIT2	sp|Q9NQR4|NIT2_HUMAN Omega-amidase NIT2 OS=Homo sapiens OX=9606 GN=NIT2 PE=1 SV=1	1	6	6	6	31.5	30.608
Q9NQX3	GPHN	sp|Q9NQX3|GEPH_HUMAN Gephyrin OS=Homo sapiens OX=9606 GN=GPHN PE=1 SV=1	1	4	4	4	8.4	79.748
Q9NR45	NANS	sp|Q9NR45|SIAS_HUMAN Sialic acid synthase OS=Homo sapiens OX=9606 GN=NANS PE=1 SV=2	1	3	3	3	12	40.307
Q9NS37	CREBZF	sp|Q9NS37|ZHANG_HUMAN CREB/ATF bZIP transcription factor OS=Homo sapiens OX=9606 GN=CREBZF PE=1 SV=2	1	1	1	1	2.8	37.134
Q9NTX5	ECHDC1	sp|Q9NTX5|ECHD1_HUMAN Ethylmalonyl-CoA decarboxylase OS=Homo sapiens OX=9606 GN=ECHDC1 PE=1 SV=2	1	1	1	1	6.2	33.698
Q9NVR5	DNAAF2	sp|Q9NVR5|KTU_HUMAN Protein kintoun OS=Homo sapiens OX=9606 GN=DNAAF2 PE=1 SV=2	1	1	1	1	2.6	91.113
Q9NVS9	PNPO	sp|Q9NVS9|PNPO_HUMAN Pyridoxine-5-phosphate oxidase OS=Homo sapiens OX=9606 GN=PNPO PE=1 SV=1	1	6	6	6	30.3	29.988
Q9NZP8	C1RL	sp|Q9NZP8|C1RL_HUMAN Complement C1r subcomponent-like protein OS=Homo sapiens OX=9606 GN=C1RL PE=1 SV=2	1	7	6	6	16.8	53.498	41603	59185	33525	36564	74303	51168	43280	61529	42723	54661	68334	63379	42149	41986	28564	28498
Q9NZT1	CALML5	sp|Q9NZT1|CALL5_HUMAN Calmodulin-like protein 5 OS=Homo sapiens OX=9606 GN=CALML5 PE=1 SV=2	1	2	2	2	21.2	15.892
Q9P2E9	RRBP1	sp|Q9P2E9|RRBP1_HUMAN Ribosome-binding protein 1 OS=Homo sapiens OX=9606 GN=RRBP1 PE=1 SV=5	1	7	7	7	7.2	152.45		40657			16492
Q9UBQ5	EIF3K	sp|Q9UBQ5|EIF3K_HUMAN Eukaryotic translation initiation factor 3 subunit K OS=Homo sapiens OX=9606 GN=EIF3K PE=1 SV=1	1	1	1	1	6.9	25.059
Q9UBQ6	EXTL2	sp|Q9UBQ6|EXTL2_HUMAN Exostosin-like 2 OS=Homo sapiens OX=9606 GN=EXTL2 PE=1 SV=1	1	2	2	2	7.3	37.465							13689				17325				21501	16117
Q9UBQ7	GRHPR	sp|Q9UBQ7|GRHPR_HUMAN Glyoxylate reductase/hydroxypyruvate reductase OS=Homo sapiens OX=9606 GN=GRHPR PE=1 SV=1	1	11	11	11	44.8	35.668	4447.5	339700
Q9UBR1	UPB1	sp|Q9UBR1|BUP1_HUMAN Beta-ureidopropionase OS=Homo sapiens OX=9606 GN=UPB1 PE=1 SV=1	1	10	10	10	42.7	43.166
Q9UBS8	RNF14	sp|Q9UBS8|RNF14_HUMAN E3 ubiquitin-protein ligase RNF14 OS=Homo sapiens OX=9606 GN=RNF14 PE=1 SV=1	1	1	1	1	3.8	53.837
Q9UEU0	VTI1B	sp|Q9UEU0|VTI1B_HUMAN Vesicle transport through interaction with t-SNAREs homolog 1B OS=Homo sapiens OX=9606 GN=VTI1B PE=1 SV=3	1	1	1	1	5.6	26.688
Q9UGM5	FETUB	sp|Q9UGM5|FETUB_HUMAN Fetuin-B OS=Homo sapiens OX=9606 GN=FETUB PE=1 SV=2	1	8	8	8	29.6	42.054	332710	213040	119820	287070	361690	227130	220620	293670	277910	200690	409820	223100	272950	229430	292000	317560
Q9UHG3	PCYOX1	sp|Q9UHG3|PCYOX_HUMAN Prenylcysteine oxidase 1 OS=Homo sapiens OX=9606 GN=PCYOX1 PE=1 SV=3	1	9	9	9	25	56.639	33484	31370	17537	38603	29198	45942	24852	18097	24344	29200	42520	30793	38303	35490	39569	44474
Q9UJ70	NAGK	sp|Q9UJ70|NAGK_HUMAN N-acetyl-D-glucosamine kinase OS=Homo sapiens OX=9606 GN=NAGK PE=1 SV=4	1	3	3	3	11.3	37.375
Q9UK55;CON__ENSEMBL:ENSBTAP00000013050	SERPINA10	sp|Q9UK55|ZPI_HUMAN Protein Z-dependent protease inhibitor OS=Homo sapiens OX=9606 GN=SERPINA10 PE=1 SV=1	2	9	9	9	22.3	50.706	102000	56415	52696	81802	35526	66149	35401	43513	60854	72499	92272	64157	55058	55411	39384	55850
Q9ULA0	DNPEP	sp|Q9ULA0|DNPEP_HUMAN Aspartyl aminopeptidase OS=Homo sapiens OX=9606 GN=DNPEP PE=1 SV=2	1	11	11	11	29.9	53.41
Q9ULV3	CIZ1	sp|Q9ULV3|CIZ1_HUMAN Cip1-interacting zinc finger protein OS=Homo sapiens OX=9606 GN=CIZ1 PE=1 SV=2	1	1	1	1	1.3	100.04
Q9UM21	MGAT4A	sp|Q9UM21|MGT4A_HUMAN Alpha-1,3-mannosyl-glycoprotein 4-beta-N-acetylglucosaminyltransferase A OS=Homo sapiens OX=9606 GN=MGAT4A PE=1 SV=1	1	1	1	1	3.6	61.543
Q9UN36	NDRG2	sp|Q9UN36|NDRG2_HUMAN Protein NDRG2 OS=Homo sapiens OX=9606 GN=NDRG2 PE=1 SV=2	1	2	2	2	8.1	40.798
Q9UNM6	PSMD13	sp|Q9UNM6|PSD13_HUMAN 26S proteasome non-ATPase regulatory subunit 13 OS=Homo sapiens OX=9606 GN=PSMD13 PE=1 SV=2	1	5	5	5	18.6	42.945
Q9UNN8	PROCR	sp|Q9UNN8|EPCR_HUMAN Endothelial protein C receptor OS=Homo sapiens OX=9606 GN=PROCR PE=1 SV=1	1	2	2	2	10.9	26.671
Q9Y223	GNE	sp|Q9Y223|GLCNE_HUMAN Bifunctional UDP-N-acetylglucosamine 2-epimerase/N-acetylmannosamine kinase OS=Homo sapiens OX=9606 GN=GNE PE=1 SV=1	1	4	4	4	7.2	79.274
Q9Y2S2	CRYL1	sp|Q9Y2S2|CRYL1_HUMAN Lambda-crystallin homolog OS=Homo sapiens OX=9606 GN=CRYL1 PE=1 SV=3	1	7	7	7	27.3	35.419
Q9Y2T3	GDA	sp|Q9Y2T3|GUAD_HUMAN Guanine deaminase OS=Homo sapiens OX=9606 GN=GDA PE=1 SV=1	1	2	2	2	5.3	51.002
Q9Y2V2	CARHSP1	sp|Q9Y2V2|CHSP1_HUMAN Calcium-regulated heat-stable protein 1 OS=Homo sapiens OX=9606 GN=CARHSP1 PE=1 SV=2	1	1	1	1	10.9	15.892
Q9Y315	DERA	sp|Q9Y315|DEOC_HUMAN Deoxyribose-phosphate aldolase OS=Homo sapiens OX=9606 GN=DERA PE=1 SV=2	1	8	8	8	34.3	35.23		105780	17355		9630.5
Q9Y490;Q9Y4G6	TLN1	sp|Q9Y490|TLN1_HUMAN Talin-1 OS=Homo sapiens OX=9606 GN=TLN1 PE=1 SV=3	2	7	7	7	3.8	269.76
Q9Y617	PSAT1	sp|Q9Y617|SERC_HUMAN Phosphoserine aminotransferase OS=Homo sapiens OX=9606 GN=PSAT1 PE=1 SV=2	1	5	5	5	15.4	40.422
Q9Y678;Q9UBF2	COPG1	sp|Q9Y678|COPG1_HUMAN Coatomer subunit gamma-1 OS=Homo sapiens OX=9606 GN=COPG1 PE=1 SV=1	2	7	7	7	11	97.717
Q9Y6B6;Q9NR31	SAR1B; SAR1A	sp|Q9Y6B6|SAR1B_HUMAN GTP-binding protein SAR1b OS=Homo sapiens OX=9606 GN=SAR1B PE=1 SV=1;sp|Q9NR31|SAR1A_HUMAN GTP-binding protein SAR1a OS=Homo sapiens OX=9606 GN=SAR1A PE=1 SV=1	2	4	4	4	21.2	22.41
Q9Y6C2	EMILIN1	sp|Q9Y6C2|EMIL1_HUMAN EMILIN-1 OS=Homo sapiens OX=9606 GN=EMILIN1 PE=1 SV=3	1	1	1	1	1.3	106.69
Q9Y6R7	FCGBP	sp|Q9Y6R7|FCGBP_HUMAN IgGFc-binding protein OS=Homo sapiens OX=9606 GN=FCGBP PE=1 SV=3	1	81	81	81	35.6	572.01	441450	222960	180610	153590	205190	243860	500090	361450	315150	291760	309880	208940	357990	228290	399640	289240
Q9Y6Z7	COLEC10	sp|Q9Y6Z7|COL10_HUMAN Collectin-10 OS=Homo sapiens OX=9606 GN=COLEC10 PE=1 SV=2	1	3	3	3	11.9	30.705	76191	79953	27626		48119	40529	62702	63027	38489	57815	72543	39312	68184	48331	52755	65225
